# Supplementary material for: The Landscape of Actionable Genomic Alterations by Next-Generation Sequencing in Tumor Tissue Versus Circulating Tumor DNA in Chinese Patients With Non-Small Cell Lung Cancer
Source: Front Oncol. 2022 Feb 22;11:751106. doi: 10.3389/fonc.2021.751106 (PMC8902245; doi:10.3389/fonc.2021.751106)
Supplement: Supplementary file 4 [file Table_2.xlsx]

## Sheet: Sheet1
Supplementary Table2 Summary for Tissue-NSCLC (n=199)					Supplementary Table2 geneSummary for Tissue-NSCLC (n=199)													Supplementary Table2 Summary for cfDNA-NSCLC (n=125)					Supplementary Table2 geneSummary for cfDNA-NSCLC (n=125)
ID	summary	Mean	Median		Hugo_Symbol	Frame_Shift_Del	Frame_Shift_Ins	In_Frame_Del	In_Frame_Ins	Missense_Mutation	Nonsense_Mutation	Splice_Site	total	MutatedSamples	AlteredSamples	Ratio		ID	summary	Mean	Median		Hugo_Symbol	Frame_Shift_Del	Frame_Shift_Ins	In_Frame_Del	In_Frame_Ins	Missense_Mutation	Nonsense_Mutation	Splice_Site	total	MutatedSamples	AlteredSamples	ratio
NCBI_Build	NA	NA	NA		TP53	1	5	2	0	94	20	9	131	120	120	0.542986		NCBI_Build	NA	NA	NA		TP53	1	1	3	0	45	6	4	60	57	57	0.327586
Center	NA	NA	NA		EGFR	0	0	48	7	75	0	0	130	108	108	0.488688		Center	NA	NA	NA		EGFR	0	0	17	2	43	1	0	63	45	45	0.258621
Samples	199	NA	NA		RB1	1	0	11	0	10	7	3	32	32	32	0.144796		Samples	125	NA	NA		CD3EAP	0	0	22	0	0	0	0	22	22	22	0.126437
nGenes	46	NA	NA		KRAS	0	0	0	0	19	1	0	20	19	19	0.0859729		nGenes	33	NA	NA		RB1	0	1	5	0	3	2	4	15	14	14	0.0804598
Frame_Shift_Del	3	0.015	0		PIK3CA	0	0	0	0	20	0	0	20	19	19	0.0859729		Frame_Shift_Del	1	0.008	0		PIK3CA	0	0	0	0	13	0	0	13	13	13	0.0747126
Frame_Shift_Ins	7	0.035	0		CD3EAP	0	0	16	0	0	0	0	16	16	16	0.0723982		Frame_Shift_Ins	4	0.032	0		KRAS	0	0	0	0	10	1	0	11	10	10	0.0574713
In_Frame_Del	79	0.397	0		CTNNB1	0	0	0	0	13	0	0	13	12	12	0.0542986		In_Frame_Del	51	0.408	0		APC	0	1	0	0	4	0	0	5	5	5	0.0287356
In_Frame_Ins	17	0.085	0		ERBB2	0	0	1	9	3	0	0	13	12	12	0.0542986		In_Frame_Ins	3	0.024	0		TERT	0	0	1	0	4	0	0	5	5	5	0.0287356
Missense_Mutation	298	1.497	1		APC	0	1	0	0	4	6	0	11	9	9	0.040724		Missense_Mutation	157	1.256	1		FBXW7	0	0	0	0	4	0	0	4	4	4	0.0229885
Nonsense_Mutation	39	0.196	0		BRAF	0	0	0	0	5	0	0	5	5	5	0.0226244		Nonsense_Mutation	11	0.088	0		HRAS	0	0	0	0	3	0	0	3	3	3	0.0172414
Splice_Site	12	0.06	0		CDKN2A	0	0	0	0	3	2	0	5	5	5	0.0226244		Splice_Site	9	0.072	0		KIT	0	0	0	0	3	0	0	3	3	3	0.0172414
total	455	2.286	2		STK11	1	1	0	0	2	1	0	5	5	5	0.0226244		total	236	1.888	2		NOS3	0	0	3	0	0	0	0	3	3	3	0.0172414
					MET	0	0	0	0	4	0	0	4	4	4	0.0180995							ATM	0	0	0	0	2	0	0	2	2	2	0.0114943
					TERT	0	0	0	0	4	0	0	4	4	4	0.0180995							CDA	0	0	0	0	2	0	0	2	2	2	0.0114943
					FBXW7	0	0	0	0	3	0	0	3	3	3	0.0135747							CDKN2A	0	0	0	0	2	0	0	2	2	2	0.0114943
					FGFR3	0	0	0	0	3	0	0	3	3	3	0.0135747							CTNNB1	0	0	0	0	2	0	0	2	2	2	0.0114943
					ALK	0	0	0	0	2	0	0	2	2	2	0.00904977							IDH1	0	0	0	0	2	0	0	2	2	2	0.0114943
					CDA	0	0	0	0	2	0	0	2	2	2	0.00904977							KDR	0	0	0	0	2	0	0	2	2	2	0.0114943
					DPYD	0	0	0	0	2	0	0	2	2	2	0.00904977							NTRK1	0	0	0	0	2	0	0	2	2	2	0.0114943
					HRAS	0	0	0	0	2	0	0	2	2	2	0.00904977							STK11	0	1	0	0	1	0	0	2	2	2	0.0114943
					IDH2	0	0	0	0	2	0	0	2	2	2	0.00904977							AKT1	0	0	0	0	1	0	0	1	1	1	0.00574713
					KDR	0	0	0	0	2	0	0	2	2	2	0.00904977							ALK	0	0	0	0	1	0	0	1	1	1	0.00574713
					KIT	0	0	0	0	1	1	0	2	2	2	0.00904977							BRAF	0	0	0	0	1	0	0	1	1	1	0.00574713
					NRAS	0	0	0	0	2	0	0	2	2	2	0.00904977							CMPK1	0	0	0	0	0	1	0	1	1	1	0.00574713
					OBSCN	0	0	0	0	2	0	0	2	2	2	0.00904977							DPYD	0	0	0	0	1	0	0	1	1	1	0.00574713
					RET	0	0	0	0	2	0	0	2	2	2	0.00904977							ERBB2	0	0	0	1	0	0	0	1	1	1	0.00574713
					ATM	0	0	0	0	1	0	0	1	1	1	0.00452489							FGFR3	0	0	0	0	1	0	0	1	1	1	0.00574713
					ERCC1	0	0	0	0	1	0	0	1	1	1	0.00452489							JAK2	0	0	0	0	1	0	0	1	1	1	0.00574713
					ESR1	0	0	0	0	1	0	0	1	1	1	0.00452489							MET	0	0	0	0	0	0	1	1	1	1	0.00574713
					ESR2	0	0	0	0	1	0	0	1	1	1	0.00452489							NQO1	0	0	0	0	1	0	0	1	1	1	0.00574713
					FGFR2	0	0	0	0	1	0	0	1	1	1	0.00452489							RET	0	0	0	0	1	0	0	1	1	1	0.00574713
					FOXL2	0	0	0	0	0	1	0	1	1	1	0.00452489							SMAD4	0	0	0	0	1	0	0	1	1	1	0.00574713
					GNA11	0	0	0	0	1	0	0	1	1	1	0.00452489							VHL	0	0	0	0	1	0	0	1	1	1	0.00574713
					IDH1	0	0	0	0	1	0	0	1	1	1	0.00452489
					MAP2K1	0	0	0	0	1	0	0	1	1	1	0.00452489
					MSH3	0	0	0	1	0	0	0	1	1	1	0.00452489
					MTHFR	0	0	0	0	1	0	0	1	1	1	0.00452489
					MTOR	0	0	0	0	1	0	0	1	1	1	0.00452489
					NOS3	0	0	1	0	0	0	0	1	1	1	0.00452489
					NQO1	0	0	0	0	1	0	0	1	1	1	0.00452489
					NTRK1	0	0	0	0	1	0	0	1	1	1	0.00452489
					PDGFRA	0	0	0	0	1	0	0	1	1	1	0.00452489
					SMAD4	0	0	0	0	1	0	0	1	1	1	0.00452489
					SMO	0	0	0	0	1	0	0	1	1	1	0.00452489
					VHL	0	0	0	0	1	0	0	1	1	1	0.00452489
					XRCC1	0	0	0	0	1	0	0	1	1	1	0.00452489
