# Supplementary material for: The Landscape of Actionable Genomic Alterations by Next-Generation Sequencing in Tumor Tissue Versus Circulating Tumor DNA in Chinese Patients With Non-Small Cell Lung Cancer
Source: Front Oncol. 2022 Feb 22;11:751106. doi: 10.3389/fonc.2021.751106 (PMC8902245; doi:10.3389/fonc.2021.751106)
Supplement: Supplementary file 5 [file Table_3.xlsx]

## Sheet: Sheet1
Supplementary Table3 Somatic copy number alterations (SCNAs) of NSCLC derived from NGS of tumor DNA
Amplication
cytoband	q value	residual q value	wide peak boundaries	genes in wide peak
5p15.33	4.8833e-92	7.8681e-92	chr5:1253836-1293959	TERT
7p11.2	6.5831e-70	1.4209e-69	chr7:55214248-55384288	EGFR
14q13.3	3.6774e-14	3.6774e-14	chr14:35553534-38123611	FOXA1	NFKBIA	PAX9	PSMA6	NKX2-1	KIAA0391	NKX2-8	MBIP	PPP2R3C	BRMS1L	INSM2	SLC25A21	MIPOL1	RALGAPA1	SFTA3	LOC100129794	MIR4503
12q14.3	4.5808e-10	4.5808e-10	chr12:66774596-68294180	DYRK2	GRIP1	CAND1
8q24.21	1.5685e-09	3.9093e-08	chr8:127922157-129440504	hsa-mir-1208	hsa-mir-1207	hsa-mir-1205	hsa-mir-1204	MYC	POU5F1B	PVT1	LOC727677	MIR1205	MIR1206	MIR1207	MIR1204	MIR1208	PCAT1
1q21.3	0.0012295	0.0012295	chr1:121351273-155655500	hsa-mir-555	hsa-mir-92b	hsa-mir-4258	hsa-mir-190b	hsa-mir-554	hsa-mir-4257	hsa-mir-3118-3	hsa-mir-3118-2	hsa-mir-3118-1	ADAR	ARNT	BCL9	CHRNB2	CKS1B	CLK2	CTSK	CTSS	ECM1	EFNA1	EFNA3	EFNA4	ENSA	FCGR1A	FDPS	FLG	FMO5	GBA	GBAP1	GJA5	GJA8	IL6R	ILF2	IVL	KCNN3	LOR	MCL1	SMCP	MTX1	MUC1	NPR1	PDZK1	PI4KB	PKLR	PRKAB2	PSMB4	PSMD4
8q21.13	2.7322e-05	0.0015794	chr8:80409653-83282489	FABP4	FABP5	IMPA1	PMP2	TPD52	STMN2	HEY1	MRPS28	PAG1	SNX16	ZBTB10	ZFAND1	CHMP4C	SLC10A5	ZNF704	FABP9	FABP12
5p13.3	0.00076381	0.0044567	chr5:3292285-49565058	hsa-mir-1274a	hsa-mir-580	hsa-mir-579	hsa-mir-4279	hsa-mir-887	hsa-mir-4278	ADCY2	C6	C7	C9	CDH6	CDH9	CDH10	CDH12	CDH18	CTNND2	DAB2	DAP	DNAH5	FGF10	FYB	GDNF	GHR	HMGCS1	IL7R	LIFR	MTRR	MYO10	NPR3	OXCT1	PMCHL1	PRKAA1	PRLR	PTGER4	RAD1	RPL37	SEPP1	SKP2	SLC1A3	SRD5A1	TARS	TRIO	ZNF131	SEMA5A	OSMR	NUP155
19q13.12	0.0064814	0.0064814	chr19:33021090-42462619	hsa-mir-641	ACTN4	AKT2	APLP1	ATP4A	AXL	BCKDHA	BLVRB	CAPNS1	CD22	CD79A	CEACAM5	CEBPA	CEBPG	CEACAM3	CEACAM7	CEACAM4	TBCB	CLC	COX6B1	COX7A1	CYP2A6	CYP2A7	CYP2A13	CYP2B6	CYP2B7P1	CYP2F1	ECH1	FBL	ETV2	GPI	FFAR1	FFAR3	FFAR2	HNRNPL	HPN	LGALS4	LGALS7	LRP3	MAG	MAP3K10	CEACAM6	NFKBIB	NPHS1	PEPD	FXYD1
3q26.33	3.0183e-05	0.011045	chr3:147563838-198022430	hsa-mir-922	hsa-mir-570	hsa-mir-3137	hsa-mir-944	hsa-mir-28	hsa-mir-1248	hsa-mir-1224	hsa-mir-569	hsa-mir-551b	hsa-mir-720	hsa-mir-1263	hsa-mir-16-2	AADAC	ACTL6A	AGTR1	AHSG	APOD	BCHE	BCL6	BDH1	AP2M1	CLCN2	CP	CPA3	CPB1	CPN2	CRYGS	DGKG	DLG1	DVL3	ECT2	EHHADH	EIF4A2	EIF4G1	EPHB3	ETV5	MECOM	FGF12	GHSR	GP5	GYG1	HRG	HES1	IL1RAP	IL12A	KNG1
13q14.2	0.01653	0.01653	chr13:48833796-48955599	RB1	ITM2B
17q12	0.01653	0.01653	chr17:35763872-39524892	ACACA	CACNB1	CDC6	CCR7	CSF3	ERBB2	GRB7	IGFBP4	KRT10	KRT12	KRT33A	KRT33B	LASP1	MLLT6	NEUROD2	PNMT	MED1	PSMB3	PSMD3	RARA	RPL19	SMARCE1	TADA2A	HNF1B	THRA	TOP2A	PCGF2	PIP4K2B	TCAP	RPL23	NR1D1	MED24	STARD3	DDX52	DUSP14	SYNRG	CASC3	IKZF3	KRT23	SOCS7	RAPGEFL1	CDK12	KRT20	CWC25	GSDMB	PLXDC1
7p22.2	0.0085081	0.031246	chr7:1-6891287	hsa-mir-589	hsa-mir-339	ACTB	GNA12	GPER	LFNG	NUDT1	PDGFA	PMS2	PRKAR1B	RAC1	FSCN1	ZNF12	AIMP2	MAFK	MAD1L1	EIF3B	CYTH3	KIAA0415	KDELR2	ADAP1	IQCE	SUN1	WIPI2	INTS1	EIF2AK1	SNX8	FTSJ2	GET4	CCZ1	RNF216	ZNF853	CYP2W1	HEATR2	ZDHHC4	CHST12	RADIL	PAPOLB	FAM20C	RBAK	C7orf26	MICALL2	FBXL18	TTYH3	USP42	PSMG3
11q13.3	0.040828	0.040828	chr11:68780163-70838290	hsa-mir-548k	hsa-mir-3164	CCND1	CTTN	FGF3	FGF4	PPFIA1	FADD	FGF19	SHANK2	MYEOV	ANO1	MRGPRF	TPCN2	ORAOV1	MIR548K	MIR3664
8p11.22	0.031094	0.044379	chr8:37979299-41305145	ADAM3A	FGFR1	ADAM2	IDO1	SFRP1	STAR	TACC1	ADAM18	ADAM9	ASH2L	BAG4	DDHD2	LSM1	WHSC1L1	C8orf4	PLEKHA2	ZMAT4	TM2D2	PPAPDC1B	LETM2	IDO2	HTRA4	ADAM32	ADAM5P	RNF5P1	C8orf86	LOC100130964
20q13.2	0.051006	0.051006	chr20:50714053-56893867	hsa-mir-4325	BMP7	CSTF1	CYP24A1	MC3R	PCK1	PFDN4	AURKA	TFAP2C	ZNF217	RAE1	BCAS1	SPO11	C20orf43	PPP4R1L	RBM38	ZFP64	DOK5	PMEPA1	CASS4	RAB22A	ZBP1	FAM210B	TSHZ2	C20orf85	GCNT7	CBLN4	CTCFL	FAM209A	FAM209B	SUMO1P1	MIR4325	MTRNR2L3	MIR4756	MIR4532	MIR5095
7q31.2	0.13641	0.13641	chr7:70974783-118315032	hsa-mir-548o	hsa-mir-4285	hsa-mir-106b	hsa-mir-591	hsa-mir-489	hsa-mir-1285-1	hsa-mir-590	hsa-mir-4284	ACHE	ASNS	AZGP1	CACNA2D1	CALCR	CAPZA2	CAV1	CAV2	KRIT1	CD36	CDK6	CFTR	AP1S1	COL1A2	CLDN4	CLDN3	CUX1	CYP3A7	CYP3A4	CYP3A5	CYP51A1	DLD	DLX5	DLX6	DYNC1I1	SLC26A3	ELN	EPHB4	EPO	GNAI1	GNB2	GNG11	GNGT1	GPR22	GRM3	GTF2I	GTF2IP1	HGF
7p15.3	0.0058569	0.14024	chr7:11220178-29685438	hsa-mir-196b	hsa-mir-148a	hsa-mir-1183	hsa-mir-3146	hsa-mir-1302-6	AHR	CHN2	CLK2P	DGKB	DFNA5	ETV1	EVX1	HNRNPA2B1	HOXA1	HOXA2	HOXA3	HOXA4	HOXA5	HOXA6	HOXA7	HOXA9	HOXA10	HOXA11	HOXA13	IL6	ITGB8	MEOX2	NPY	SP4	TWIST1	DNAH11	TAX1BP1	SKAP2	CREB5	NFE2L3	HDAC9	RAPGEF5	KIAA0087	TRIL	ARL4A	GPNMB	AGR2	IGF2BP3	NUPL2	HIBADH	CBX3
3q26.31	5.1924e-05	0.15007	chr3:141717910-198022430	hsa-mir-922	hsa-mir-570	hsa-mir-3137	hsa-mir-944	hsa-mir-28	hsa-mir-1248	hsa-mir-1224	hsa-mir-569	hsa-mir-551b	hsa-mir-720	hsa-mir-1263	hsa-mir-16-2	AADAC	ACTL6A	AGTR1	AHSG	APOD	ATR	BCHE	BCL6	BDH1	AP2M1	CLCN2	CP	CPA3	CPB1	CPN2	CRYGS	DGKG	DLG1	DVL3	ECT2	EHHADH	EIF4A2	EIF4G1	EPHB3	ETV5	MECOM	FGF12	GHSR	GP5	GYG1	HRG	HES1	IL1RAP	IL12A
13q34	0.19469	0.19469	chr13:69665130-115169878	hsa-mir-1267	hsa-mir-4306	hsa-mir-623	hsa-mir-3170	hsa-mir-92a-1	hsa-mir-622	ATP4B	KLF5	BTF3P11	CLN5	COL4A1	COL4A2	DACH1	DCT	GPR183	EDNRB	EFNB2	ERCC5	F7	F10	FGF14	GPC5	GAS6	GPR18	ING1	IPO5	LAMP1	LIG4	LMO7	PCCA	POU4F1	DNAJC3	RAP2A	GRK1	ATXN8OS	SLC10A2	SLC15A1	SOX1	TFDP1	TPP2	UCHL3	ZIC2	STK24	CUL4A	IRS2	SCEL
Deletion
cytoband	q value	residual q value	wide peak boundaries	genes in wide peak
6q22.1	0	0	chr6:117641167-117649630	ROS1
7q34	1.0317e-245	1.0317e-245	chr7:140484989-140497817	BRAF
10q11.21	1.2179e-68	1.2179e-68	chr10:39066026-43613899	RET	ZNF33B	BMS1	LOC84856	LOC441666	ZNF37BP
1q23.1	6.2627e-17	6.2627e-17	chr1:156833243-157158362	hsa-mir-765	ETV3	NTRK1	ARHGEF11	LRRC71	CYCSP52	PEAR1	ETV3L	MIR765
10q26.13	7.175e-11	7.175e-11	chr10:123158883-123478280	FGFR2
20q13.33	2.0873e-08	2.0873e-08	chr20:59729305-63025520	hsa-mir-647	hsa-mir-4326	hsa-mir-124-3	hsa-mir-133a-2	hsa-mir-3195	hsa-mir-1257	CDH4	CHRNA4	COL9A3	EEF1A2	NPBWR2	KCNQ2	LAMA5	MYT1	NTSR1	OPRL1	PSMA7	PTK6	RPS21	SRMS	TAF4	TCEA2	TPD52L2	TNFRSF6B	OSBPL2	ARFRP1	RGS19	TCFL5	ADRM1	OGFR	DIDO1	HRH3	PRPF6	SS18L1	GTPBP5	GMEB2	SLCO4A1	STMN3	RTEL1	SOX18	YTHDF1	LIME1	UCKL1	C20orf11	PCMTD2	C20orf20
11p15.5	8.0884e-05	8.0884e-05	chr11:1-3475383	hsa-mir-483	hsa-mir-675	hsa-mir-4298	hsa-mir-210	AP2A2	ASCL2	CARS	CD81	CD151	CDKN1C	CTSD	DRD4	DUSP8	HRAS	IGF2	INS	IRF7	KCNQ1	LSP1	MUC2	MUC6	NAP1L4	SLC22A18	SLC22A18AS	POLR2L	PSMD13	RNH1	MRPL23	RPLP2	SCT	TALDO1	TH	TSPAN4	TNNI2	TNNT3	PHLDA2	ZNF195	RASSF7	IFITM1	BRSK2	TSPAN32	TSSC4	IFITM3	DEAF1	IFITM2	OR7E12P
4p16.3	0.0013244	0.0013244	chr4:1-2086619	hsa-mir-943	hsa-mir-571	ATP5I	CTBP1	DGKQ	FGFR3	GAK	IDUA	LETM1	MYL5	PDE6B	WHSC1	WHSC2	ZNF141	SLBP	MAEA	PCGF3	SPON2	TACC3	CPLX1	SLC26A1	FGFRL1	PIGG	KIAA1530	ABCA11P	MFSD7	TMEM175	C4orf42	TMEM129	ZNF595	FAM53A	ZNF721	ZNF718	CRIPAK	RNF212	NAT8L	POLN	C4orf48	ZNF876P	ZNF732	SCARNA22	MIR943	LOC100129917	LOC100130872	TMED11P
16p13.3	0.001641	0.001641	chr16:1-2327219	hsa-mir-940	hsa-mir-1225	hsa-mir-3177	hsa-mir-662	hsa-mir-3176	ABCA3	ARHGDIG	CLCN7	ECI1	DNASE1L2	E4F1	GFER	HAGH	HBA1	HBA2	HBM	HBQ1	HBZ	IGFALS	MPG	NDUFB10	NME3	NME4	NTHL1	PKD1	RPL3L	RPS2	SOLH	SSTR5	TPSAB1	TSC2	UBE2I	NPRL3	AXIN1	RGS11	CACNA1H	BAIAP3	RHBDL1	PIGQ	SYNGR3	SLC9A3R2	RAB11FIP3	IFT140	TELO2	NUBP2	MSLN
8q24.3	0.0016999	0.0016999	chr8:142006841-146364022	hsa-mir-1234	hsa-mir-939	hsa-mir-661	hsa-mir-937	hsa-mir-1302-7	BAI1	CYC1	CYP11B1	CYP11B2	EEF1D	GLI4	GML	GPR20	GPT	GRINA	HSF1	LY6E	LY6H	TONSL	PLEC	PTK2	RPL8	TSTA3	ZNF7	ZNF16	PSCA	LY6D	JRK	DGAT1	GPAA1	FOXH1	RECQL4	LRRC14	ZNF623	PTP4A3	PUF60	DENND3	ZC3H3	ARC	BOP1	SCRIB	FBXL6	OPLAH	COMMD5	CPSF1	CYHR1
13q34	0.0038662	0.0038662	chr13:110996553-115169878	ATP4B	COL4A2	F7	F10	GAS6	ING1	LAMP1	GRK1	SOX1	TFDP1	CUL4A	PROZ	ARHGEF7	CDC16	TUBGCP3	RASA3	ATP11A	MCF2L	TMCO3	DCUN1D2	ANKRD10	RAB20	CARKD	PCID2	UPF3A	CARS2	GRTP1	ADPRHL1	TEX29	SPACA7	LINC00346	CHAMP1	FAM70B	C13orf35	FLJ44054	FLJ41484	LINC00552	MCF2L-AS1	LOC100506394
7p22.3	0.0072421	0.0072421	chr7:1-2542403	hsa-mir-339	GPER	NUDT1	PDGFA	PRKAR1B	MAFK	MAD1L1	EIF3B	ADAP1	SUN1	INTS1	SNX8	FTSJ2	GET4	CYP2W1	HEATR2	CHST12	FAM20C	MICALL2	PSMG3	C7orf50	ZFAND2A	COX19	KIAA1908	GPR146	TMEM184A	TFAMP1	UNCX	ELFN1	FLJ44511	LOC442497	MIR339	LOC100288524	MIR4655
9q34.3	0.024108	0.024108	chr9:135503882-141213431	hsa-mir-602	hsa-mir-4292	hsa-mir-126	ABCA2	ABO	C8G	CACNA1B	ENTPD2	CEL	CELP	COL5A1	DBH	SARDH	FCN1	FCN2	FUT7	GRIN1	LCN1	NOTCH1	PAEP	PTGDS	RALGDS	RPL7A	RXRA	SNAPC4	SURF1	SURF2	SURF4	MED22	SURF6	TRAF2	TSC1	VAV2	BRD3	LHX3	GFI1B	SSNA1	EDF1	CLIC3	GTF3C5	GTF3C4	ADAMTSL2	PPP1R26	SEC16A	TUBB4B	UBAC1
5p15.33	0.10333	0.10333	chr5:1-1965605	hsa-mir-4277	NDUFS6	SDHA	SLC6A3	SLC9A3	TERT	TRIP13	PDCD6	SLC12A7	TPPP	EXOC3	PP7080	IRX4	CEP72	AHRR	MRPL36	BRD9	ZDHHC11	LPCAT1	CLPTM1L	NKD2	C5orf55	CCDC127	PLEKHG4B	SLC6A19	SLC6A18	LRRC14B	SDHAP3	LOC728613	MIR4277	LOC100506688	MIR4457	MIR4456	MIR4635
1p36.33	0.12607	0.12607	chr1:1-3639245	hsa-mir-551a	hsa-mir-4251	hsa-mir-429	hsa-mir-1302-2	CDK11B	DVL1	MEGF6	GABRD	GNB1	PEX10	PRKCZ	SCNN1D	SKI	TP73	TNFRSF4	MMP23B	MMP23A	TNFRSF14	TNFRSF18	ISG15	PLCH2	SLC35E2	RER1	NOC2L	OR4F3	ARHGEF16	SSU72	WRAP73	SDF4	MXRA8	CPSF3L	C1orf159	AURKAIP1	MRPL20	ATAD3A	PANK4	HES4	PRDM16	VWA1	NADK	MMEL1	OR4F5	LINC00115	MORN1	GLTPD1	OR4F16
Supplementary Table3 Somatic copy number alterations (SCNAs) of NSCLC derived from NGS of cfDNA
Amplication
cytoband	q value	residual q value	wide peak boundaries	genes in wide peak
7p11.2	2.9976e-22	2.9976e-22	chr7:55210971-55384447	EGFR
5p15.33	6.7576e-14	1.286e-13	chr5:1-1367104	SDHA	SLC9A3	TERT	TRIP13	PDCD6	SLC12A7	TPPP	EXOC3	PP7080	CEP72	AHRR	BRD9	ZDHHC11	CLPTM1L	NKD2	C5orf55	CCDC127	PLEKHG4B	SLC6A19	SLC6A18	LRRC14B	LOC100506688	MIR4457	MIR4456	MIR4635
8q22.3	0.086822	0.086822	chr8:90313052-119101747	hsa-mir-2053	hsa-mir-548a-3	hsa-mir-3151	hsa-mir-1273	hsa-mir-875	hsa-mir-3150	ANGPT1	ATP6V1C1	OSGIN2	CALB1	RUNX1T1	CDH17	COX6C	DECR1	DPYS	EXT1	GEM	EIF3E	KCNS2	MATN2	NBN	ODF1	POLR2K	RAD21	RPL30	SDC2	SPAG1	STK3	KLF10	TRHR	TRPS1	UQCRB	YWHAZ	FZD6	EIF3H	RIPK2	CCNE2	EBAG9	TTC35	RIMS2	PTDSS1	HRSP12	PGCP	POP1	ZFPM2	RAD54B
1q23.3	0.10953	0.10953	chr1:159105872-166358111	hsa-mir-921	hsa-mir-556	hsa-mir-4259	ALDH9A1	APCS	APOA2	ATP1A2	ATP1A4	CASQ1	CD48	COPA	CRP	FCER1A	FCER1G	FCGR2A	FCGR2B	FCGR3A	FCGR3B	DARC	HSPA6	HSPA7	KCNJ9	KCNJ10	LMX1A	LY9	MGST3	MPZ	NDUFS2	NHLH1	NIT1	DDR2	PBX1	PFDN2	PPOX	PEX19	RGS4	RXRG	SDHC	SLAMF1	UAP1	UCK2	USF1	TAGLN2	RGS5	PEA15	B4GALT3
5p14.1	0.07797	0.1386	chr5:7781049-49565068	hsa-mir-1274a	hsa-mir-580	hsa-mir-579	hsa-mir-4279	hsa-mir-887	ADCY2	C6	C7	C9	CDH6	CDH9	CDH10	CDH12	CDH18	CTNND2	DAB2	DAP	DNAH5	FGF10	FYB	GDNF	GHR	HMGCS1	IL7R	LIFR	MTRR	MYO10	NPR3	OXCT1	PMCHL1	PRKAA1	PRLR	PTGER4	RAD1	RPL37	SEPP1	SKP2	SLC1A3	TARS	TRIO	ZNF131	SEMA5A	OSMR	NUP155	MARCH6	BASP1
7q31.2	0.19485	0.19485	chr7:114245380-116965147	CAPZA2	CAV1	CAV2	MET	WNT2	ST7	TFEC	TES	MDFIC	ST7-AS1	ST7-AS2	ST7-OT3	FOXP2	ST7-OT4	MIR3666
Deletion
cytoband	q value	residual q value	wide peak boundaries	genes in wide peak
7q34	0	0	chr7:140471468-140509938	BRAF
10q26.13	3.8691e-126	3.8691e-126	chr10:123158883-123478335	FGFR2
6q22.1	7.2569e-85	7.2569e-85	chr6:117545679-117865314	ROS1	VGLL2	DCBLD1
[truncated: 340 more columns]
