# Supplementary material for: The Landscape of Actionable Genomic Alterations by Next-Generation Sequencing in Tumor Tissue Versus Circulating Tumor DNA in Chinese Patients With Non-Small Cell Lung Cancer
Source: Front Oncol. 2022 Feb 22;11:751106. doi: 10.3389/fonc.2021.751106 (PMC8902245; doi:10.3389/fonc.2021.751106)
Supplement: Supplementary file 6 [file Table_4.xlsx]

## Sheet: Sheet1
Supplementary Table4 Summary for Tissue-LUAD (n=176)					Supplementary Table4 geneSummary for Tissue-LUAD (n=176)													Supplementary Table4 Summary for cfDNA-LUAD (n=22)					Supplementary Table4 geneSummary for cfDNA-LUAD (n=22)												Supplementary Table4 Summary for Tissue-LUSC (n=102)					Supplementary Table4 geneSummary for Tissue-LUSC (n=102)
ID	summary	Mean	Median		Hugo_Symbol	Frame_Shift_Del	Frame_Shift_Ins	In_Frame_Del	In_Frame_Ins	Missense_Mutation	Nonsense_Mutation	Splice_Site	total	MutatedSamples	AlteredSamples	Ratio		ID	summary	Mean	Median		Hugo_Symbol	Frame_Shift_Ins	In_Frame_Del	In_Frame_Ins	Missense_Mutation	Nonsense_Mutation	Splice_Site	total	MutatedSamples	AlteredSamples	ratio		ID	summary	Mean	Median		Hugo_Symbol	In_Frame_Del	Missense_Mutation	Nonsense_Mutation	Splice_Site	total	MutatedSamples	AlteredSamples	ratio
NCBI_Build	NA	NA	NA		EGFR	0	0	47	7	72	0	0	126	105	105	0.532995		NCBI_Build	NA	NA	NA		TP53	0	3	0	36	3	3	45	43	43	0.300699		NCBI_Build	NA	NA	NA		TP53	0	11	2	3	16	16	16	0.695652
Center	NA	NA	NA		TP53	1	5	2	0	83	17	6	114	103	103	0.522843		Center	NA	NA	NA		EGFR	0	16	2	37	1	0	56	40	40	0.27972		Center	NA	NA	NA		EGFR	1	3	0	0	4	3	3	0.130435
Samples	176	NA	NA		RB1	1	0	10	0	8	7	3	29	29	29	0.147208		Samples	102	NA	NA		CD3EAP	0	20	0	0	0	0	20	20	20	0.13986		Samples	22	NA	NA		PIK3CA	0	3	0	0	3	3	3	0.130435
nGenes	44	NA	NA		KRAS	0	0	0	0	18	1	0	19	18	18	0.0913706		nGenes	33	NA	NA		RB1	0	3	0	3	2	3	11	10	10	0.0699301		nGenes	13	NA	NA		RB1	1	2	0	0	3	3	3	0.130435
Frame_Shift_Del	3	0.017	0		PIK3CA	0	0	0	0	17	0	0	17	16	16	0.0812183		Frame_Shift_Ins	2	0.02	0		KRAS	0	0	0	9	1	0	10	9	9	0.0629371		In_Frame_Del	4	0.182	0		CD3EAP	2	0	0	0	2	2	2	0.0869565
Frame_Shift_Ins	7	0.04	0		CD3EAP	0	0	14	0	0	0	0	14	14	14	0.071066		In_Frame_Del	46	0.451	0		PIK3CA	0	0	0	8	0	0	8	8	8	0.0559441		Missense_Mutation	26	1.182	1		CDKN2A	0	0	1	0	1	1	1	0.0434783
In_Frame_Del	75	0.426	0		CTNNB1	0	0	0	0	13	0	0	13	12	12	0.0609137		In_Frame_Ins	3	0.029	0		APC	1	0	0	4	0	0	5	5	5	0.034965		Nonsense_Mutation	3	0.136	0		DPYD	0	1	0	0	1	1	1	0.0434783
In_Frame_Ins	17	0.097	0		ERBB2	0	0	1	9	3	0	0	13	12	12	0.0609137		Missense_Mutation	131	1.284	1		FBXW7	0	0	0	4	0	0	4	4	4	0.027972		Splice_Site	3	0.136	0		FGFR2	0	1	0	0	1	1	1	0.0434783
Missense_Mutation	271	1.54	1		APC	0	1	0	0	4	6	0	11	9	9	0.0456853		Nonsense_Mutation	8	0.078	0		HRAS	0	0	0	3	0	0	3	3	3	0.020979		total	36	1.636	2		KDR	0	1	0	0	1	1	1	0.0434783
Nonsense_Mutation	35	0.199	0		BRAF	0	0	0	0	5	0	0	5	5	5	0.0253807		Splice_Site	7	0.069	0		NOS3	0	3	0	0	0	0	3	3	3	0.020979							KIT	0	1	0	0	1	1	1	0.0434783
Splice_Site	9	0.051	0		STK11	1	1	0	0	2	1	0	5	5	5	0.0253807		total	197	1.931	2		ATM	0	0	0	2	0	0	2	2	2	0.013986							MTHFR	0	1	0	0	1	1	1	0.0434783
total	417	2.369	2		CDKN2A	0	0	0	0	3	1	0	4	4	4	0.0203046							CDA	0	0	0	2	0	0	2	2	2	0.013986							NRAS	0	1	0	0	1	1	1	0.0434783
					MET	0	0	0	0	4	0	0	4	4	4	0.0203046							CDKN2A	0	0	0	2	0	0	2	2	2	0.013986							TERT	0	1	0	0	1	1	1	0.0434783
					FBXW7	0	0	0	0	3	0	0	3	3	3	0.0152284							CTNNB1	0	0	0	2	0	0	2	2	2	0.013986
					FGFR3	0	0	0	0	3	0	0	3	3	3	0.0152284							KDR	0	0	0	2	0	0	2	2	2	0.013986
					TERT	0	0	0	0	3	0	0	3	3	3	0.0152284							KIT	0	0	0	2	0	0	2	2	2	0.013986
					ALK	0	0	0	0	2	0	0	2	2	2	0.0101523							NTRK1	0	0	0	2	0	0	2	2	2	0.013986
					CDA	0	0	0	0	2	0	0	2	2	2	0.0101523							STK11	1	0	0	1	0	0	2	2	2	0.013986
					HRAS	0	0	0	0	2	0	0	2	2	2	0.0101523							TERT	0	1	0	1	0	0	2	2	2	0.013986
					IDH2	0	0	0	0	2	0	0	2	2	2	0.0101523							AKT1	0	0	0	1	0	0	1	1	1	0.00699301
					OBSCN	0	0	0	0	2	0	0	2	2	2	0.0101523							ALK	0	0	0	1	0	0	1	1	1	0.00699301
					RET	0	0	0	0	2	0	0	2	2	2	0.0101523							BRAF	0	0	0	1	0	0	1	1	1	0.00699301
					ATM	0	0	0	0	1	0	0	1	1	1	0.00507614							CMPK1	0	0	0	0	1	0	1	1	1	0.00699301
					DPYD	0	0	0	0	1	0	0	1	1	1	0.00507614							DPYD	0	0	0	1	0	0	1	1	1	0.00699301
					ERCC1	0	0	0	0	1	0	0	1	1	1	0.00507614							ERBB2	0	0	1	0	0	0	1	1	1	0.00699301
					ESR1	0	0	0	0	1	0	0	1	1	1	0.00507614							FGFR3	0	0	0	1	0	0	1	1	1	0.00699301
					ESR2	0	0	0	0	1	0	0	1	1	1	0.00507614							IDH1	0	0	0	1	0	0	1	1	1	0.00699301
					FOXL2	0	0	0	0	0	1	0	1	1	1	0.00507614							JAK2	0	0	0	1	0	0	1	1	1	0.00699301
					GNA11	0	0	0	0	1	0	0	1	1	1	0.00507614							MET	0	0	0	0	0	1	1	1	1	0.00699301
					IDH1	0	0	0	0	1	0	0	1	1	1	0.00507614							NQO1	0	0	0	1	0	0	1	1	1	0.00699301
					KDR	0	0	0	0	1	0	0	1	1	1	0.00507614							RET	0	0	0	1	0	0	1	1	1	0.00699301
					KIT	0	0	0	0	0	1	0	1	1	1	0.00507614							SMAD4	0	0	0	1	0	0	1	1	1	0.00699301
					MAP2K1	0	0	0	0	1	0	0	1	1	1	0.00507614							VHL	0	0	0	1	0	0	1	1	1	0.00699301
					MSH3	0	0	0	1	0	0	0	1	1	1	0.00507614
					MTOR	0	0	0	0	1	0	0	1	1	1	0.00507614
					NOS3	0	0	1	0	0	0	0	1	1	1	0.00507614
					NQO1	0	0	0	0	1	0	0	1	1	1	0.00507614
					NRAS	0	0	0	0	1	0	0	1	1	1	0.00507614
					NTRK1	0	0	0	0	1	0	0	1	1	1	0.00507614
					PDGFRA	0	0	0	0	1	0	0	1	1	1	0.00507614
					SMAD4	0	0	0	0	1	0	0	1	1	1	0.00507614
					SMO	0	0	0	0	1	0	0	1	1	1	0.00507614
					VHL	0	0	0	0	1	0	0	1	1	1	0.00507614
					XRCC1	0	0	0	0	1	0	0	1	1	1	0.00507614
[truncated: 15 more columns]
