# Supplementary material for: The Landscape of Actionable Genomic Alterations by Next-Generation Sequencing in Tumor Tissue Versus Circulating Tumor DNA in Chinese Patients With Non-Small Cell Lung Cancer
Source: Front Oncol. 2022 Feb 22;11:751106. doi: 10.3389/fonc.2021.751106 (PMC8902245; doi:10.3389/fonc.2021.751106)
Supplement: Supplementary file 7 [file Table_5.xlsx]

## Sheet: Sheet1
Supplementary Table5 Signaling pathways enriched by KEGG analysis of all somatic mutated genes in tumor DNA from 199 NSCLC patients.										Supplementary Table5 Signaling pathways enriched by KEGG analysis of all somatic mutated genes in cfDNA from 125 NSCLC patients.										Supplementary Table5 Functional terms enriched by GO analysis of all somatic mutated genes in tumor DNA from 199 NSCLC patients.										Supplementary Table5 Functional terms enriched by GO analysis of all somatic mutated genes in cfDNA from 125 NSCLC patients.
ID	Description	GeneRatio	BgRatio	pvalue	p.adjust	qvalue	Gene	Count		ID	Description	GeneRatio	BgRatio	pvalue	p.adjust	qvalue	Gene	Count		ID	Description	GeneRatio	BgRatio	pvalue	p.adjust	qvalue	Gene	Count		ID	Description	GeneRatio	BgRatio	pvalue	p.adjust	qvalue	Gene	Count
hsa05230	Central carbon metabolism in cancer	18/43	70/8109	3.43808e-27	6.01665e-25	2.38856e-25	EGFR/TP53/MET/PIK3CA/FGFR3/KRAS/IDH2/ERBB2/RET/HRAS/KIT/PDGFRA/NTRK1/NRAS/MAP2K1/IDH1/FGFR2/MTOR	18		hsa05230	Central carbon metabolism in cancer	13/32	70/8109	1.39605e-19	1.76491e-17	6.22911e-18	TP53/ERBB2/KRAS/EGFR/PIK3CA/KIT/HRAS/NTRK1/IDH1/AKT1/RET/MET/FGFR3	13		GO:0004714	transmembrane receptor protein tyrosine kinase activity	11/45	61/18337	1.97978e-18	4.33572e-16	2.37574e-16	EGFR/MET/FGFR3/KDR/ERBB2/RET/KIT/PDGFRA/NTRK1/ALK/FGFR2	11		GO:0004714	transmembrane receptor protein tyrosine kinase activity	9/32	61/18337	7.11416e-16	1.29478e-13	7.63836e-14	ERBB2/EGFR/KIT/NTRK1/RET/KDR/ALK/MET/FGFR3	9
hsa05223	Non-small cell lung cancer	14/43	72/8109	3.19706e-19	2.00456e-17	7.95796e-18	EGFR/RB1/TP53/CDKN2A/MET/PIK3CA/KRAS/ERBB2/RET/HRAS/BRAF/NRAS/ALK/MAP2K1	14		hsa05223	Non-small cell lung cancer	13/32	72/8109	2.07637e-19	1.76491e-17	6.22911e-18	TP53/ERBB2/KRAS/EGFR/PIK3CA/RB1/CDKN2A/HRAS/AKT1/RET/ALK/BRAF/MET	13		GO:0019199	transmembrane receptor protein kinase activity	11/45	80/18337	4.8032e-17	5.25951e-15	2.88192e-15	EGFR/MET/FGFR3/KDR/ERBB2/RET/KIT/PDGFRA/NTRK1/ALK/FGFR2	11		GO:0019199	transmembrane receptor protein kinase activity	9/32	80/18337	9.31076e-15	8.47279e-13	4.99841e-13	ERBB2/EGFR/KIT/NTRK1/RET/KDR/ALK/MET/FGFR3	9
hsa05226	Gastric cancer	17/43	149/8109	3.43639e-19	2.00456e-17	7.95796e-18	EGFR/RB1/TP53/CTNNB1/MET/SMAD4/PIK3CA/KRAS/TERT/APC/ERBB2/HRAS/BRAF/NRAS/MAP2K1/FGFR2/MTOR	17		hsa05225	Hepatocellular carcinoma	15/32	168/8109	1.2351e-17	6.99892e-16	2.47021e-16	TP53/KRAS/EGFR/PIK3CA/RB1/APC/CDKN2A/HRAS/TERT/AKT1/CTNNB1/SMAD4/BRAF/NQO1/MET	15		GO:0004713	protein tyrosine kinase activity	12/45	135/18337	3.60334e-16	2.63044e-14	1.44134e-14	EGFR/MET/FGFR3/KDR/ERBB2/RET/KIT/PDGFRA/NTRK1/ALK/MAP2K1/FGFR2	12		GO:0004713	protein tyrosine kinase activity	10/32	135/18337	1.87522e-14	1.13763e-12	6.71132e-13	ERBB2/EGFR/KIT/JAK2/NTRK1/RET/KDR/ALK/MET/FGFR3	10
hsa01521	EGFR tyrosine kinase inhibitor resistance	14/43	79/8109	1.30014e-18	5.6881e-17	2.25813e-17	EGFR/MET/PIK3CA/FGFR3/KRAS/KDR/ERBB2/HRAS/PDGFRA/BRAF/NRAS/MAP2K1/FGFR2/MTOR	14		hsa05226	Gastric cancer	14/32	149/8109	9.57302e-17	4.06853e-15	1.43595e-15	TP53/ERBB2/KRAS/EGFR/PIK3CA/RB1/APC/HRAS/TERT/AKT1/CTNNB1/SMAD4/BRAF/MET	14		GO:0019838	growth factor binding	7/45	137/18337	3.98862e-08	2.18377e-06	1.19658e-06	EGFR/FGFR3/KDR/ERBB2/PDGFRA/NTRK1/FGFR2	7		GO:0019903	protein phosphatase binding	6/32	148/18337	1.90313e-07	8.65923e-06	5.10839e-06	TP53/ERBB2/EGFR/AKT1/CTNNB1/MET	6
hsa05225	Hepatocellular carcinoma	17/43	168/8109	2.78581e-18	9.75032e-17	3.8708e-17	EGFR/RB1/TP53/CDKN2A/CTNNB1/MET/SMAD4/PIK3CA/KRAS/TERT/APC/HRAS/BRAF/NRAS/MAP2K1/MTOR/NQO1	17		hsa01521	EGFR tyrosine kinase inhibitor resistance	11/32	79/8109	3.99617e-15	1.3587e-13	4.7954e-14	ERBB2/KRAS/EGFR/PIK3CA/JAK2/HRAS/AKT1/KDR/BRAF/MET/FGFR3	11		GO:0140296	general transcription initiation factor binding	4/45	45/18337	4.38043e-06	0.000191863	0.00010513	TP53/ESR1/MTOR/ERCC1	4		GO:0019902	phosphatase binding	6/32	193/18337	9.07561e-07	3.30352e-05	1.94887e-05	TP53/ERBB2/EGFR/AKT1/CTNNB1/MET	6
hsa05224	Breast cancer	16/43	147/8109	1.03687e-17	3.02422e-16	1.20059e-16	EGFR/RB1/TP53/CTNNB1/ESR2/PIK3CA/KRAS/APC/ERBB2/HRAS/KIT/ESR1/BRAF/NRAS/MAP2K1/MTOR	16		hsa05213	Endometrial cancer	10/32	58/8109	8.87133e-15	2.51354e-13	8.87133e-14	TP53/ERBB2/KRAS/EGFR/PIK3CA/APC/HRAS/AKT1/CTNNB1/BRAF	10		GO:0008022	protein C-terminus binding	6/45	185/18337	5.71137e-06	0.000208465	0.000114227	CTNNB1/TERT/ERBB2/HRAS/MAP2K1/ERCC1	6		GO:0019838	growth factor binding	5/32	137/18337	3.70423e-06	0.000112362	6.62862e-05	ERBB2/EGFR/NTRK1/KDR/FGFR3	5
hsa05215	Prostate cancer	14/43	97/8109	2.75006e-17	6.87515e-16	2.72938e-16	EGFR/RB1/TP53/CTNNB1/PIK3CA/KRAS/ERBB2/HRAS/PDGFRA/BRAF/NRAS/MAP2K1/FGFR2/MTOR	14		hsa05219	Bladder cancer	9/32	41/8109	2.17664e-14	5.28612e-13	1.86569e-13	TP53/ERBB2/KRAS/EGFR/RB1/CDKN2A/HRAS/BRAF/FGFR3	9		GO:0050661	NADP binding	4/45	53/18337	8.48672e-06	0.000236227	0.000129439	DPYD/IDH1/MTHFR/NOS3	4		GO:0008022	protein C-terminus binding	5/32	185/18337	1.59843e-05	0.000415593	0.000245173	ERBB2/JAK2/HRAS/TERT/CTNNB1	5
hsa01522	Endocrine resistance	14/43	98/8109	3.19759e-17	6.99472e-16	2.77685e-16	EGFR/RB1/TP53/CDKN2A/ESR2/PIK3CA/KRAS/ERBB2/HRAS/ESR1/BRAF/NRAS/MAP2K1/MTOR	14		hsa05218	Melanoma	10/32	72/8109	8.80473e-14	1.87101e-12	6.60355e-13	TP53/KRAS/EGFR/PIK3CA/RB1/CDKN2A/HRAS/AKT1/BRAF/MET	10		GO:0004674	protein serine/threonine kinase activity	8/45	430/18337	8.62929e-06	0.000236227	0.000129439	EGFR/PIK3CA/OBSCN/STK11/BRAF/ATM/MAP2K1/MTOR	8		GO:0106311	protein threonine kinase activity	5/32	248/18337	6.49336e-05	0.00133836	0.000789548	PIK3CA/STK11/ATM/AKT1/BRAF	5
hsa05219	Bladder cancer	11/43	41/8109	6.56983e-17	1.27747e-15	5.07145e-16	EGFR/RB1/TP53/CDKN2A/FGFR3/KRAS/ERBB2/HRAS/BRAF/NRAS/MAP2K1	11		hsa05224	Breast cancer	12/32	147/8109	1.32562e-13	2.50396e-12	8.8375e-13	TP53/ERBB2/KRAS/EGFR/PIK3CA/RB1/APC/KIT/HRAS/AKT1/CTNNB1/BRAF	12		GO:0001091	RNA polymerase II general transcription initiation factor binding	3/45	19/18337	1.30197e-05	0.000316813	0.000173596	TP53/ESR1/ERCC1	3		GO:0106310	protein serine kinase activity	5/32	249/18337	6.61827e-05	0.00133836	0.000789548	PIK3CA/STK11/ATM/AKT1/BRAF	5
hsa05210	Colorectal cancer	13/43	86/8109	2.3721e-16	4.15118e-15	1.64799e-15	EGFR/TP53/CTNNB1/SMAD4/PIK3CA/KRAS/APC/MSH3/HRAS/BRAF/NRAS/MAP2K1/MTOR	13		hsa05212	Pancreatic cancer	10/32	76/8109	1.55184e-13	2.63813e-12	9.31105e-13	TP53/ERBB2/KRAS/EGFR/PIK3CA/RB1/CDKN2A/AKT1/SMAD4/BRAF	10		GO:0019903	protein phosphatase binding	5/45	148/18337	3.01487e-05	0.000563072	0.000308532	EGFR/TP53/CTNNB1/MET/ERBB2	5		GO:0004674	protein serine/threonine kinase activity	6/32	430/18337	8.67345e-05	0.00157857	0.000931254	EGFR/PIK3CA/STK11/ATM/AKT1/BRAF	6
hsa05218	Melanoma	12/43	72/8109	1.13771e-15	1.80999e-14	7.18551e-15	EGFR/RB1/TP53/CDKN2A/MET/PIK3CA/KRAS/HRAS/PDGFRA/BRAF/NRAS/MAP2K1	12		hsa05210	Colorectal cancer	10/32	86/8109	5.61519e-13	8.67801e-12	3.06283e-12	TP53/KRAS/EGFR/PIK3CA/APC/HRAS/AKT1/CTNNB1/SMAD4/BRAF	10		GO:0106311	protein threonine kinase activity	6/45	248/18337	3.01649e-05	0.000563072	0.000308532	PIK3CA/OBSCN/STK11/BRAF/ATM/MTOR	6		GO:0001085	RNA polymerase II transcription factor binding	3/32	52/18337	0.000100664	0.00161642	0.000953585	TP53/CTNNB1/SMAD4	3
hsa05214	Glioma	12/43	75/8109	1.91401e-15	2.79127e-14	1.10811e-14	EGFR/RB1/TP53/CDKN2A/PIK3CA/KRAS/HRAS/PDGFRA/BRAF/NRAS/MAP2K1/MTOR	12		hsa04151	PI3K-Akt signaling pathway	15/32	354/8109	8.56119e-13	1.21284e-11	4.2806e-12	TP53/ERBB2/KRAS/EGFR/PIK3CA/KIT/JAK2/HRAS/STK11/NOS3/NTRK1/AKT1/KDR/MET/FGFR3	15		GO:0106310	protein serine kinase activity	6/45	249/18337	3.08532e-05	0.000563072	0.000308532	PIK3CA/OBSCN/STK11/BRAF/ATM/MTOR	6		GO:0050661	NADP binding	3/32	53/18337	0.000106577	0.00161642	0.000953585	NOS3/IDH1/DPYD	3
hsa05213	Endometrial cancer	11/43	58/8109	4.45048e-15	5.99103e-14	2.37839e-14	EGFR/TP53/CTNNB1/PIK3CA/KRAS/APC/ERBB2/HRAS/BRAF/NRAS/MAP2K1	11		hsa05215	Prostate cancer	10/32	97/8109	1.94048e-12	2.53755e-11	8.95606e-12	TP53/ERBB2/KRAS/EGFR/PIK3CA/RB1/HRAS/AKT1/CTNNB1/BRAF	10		GO:0001223	transcription coactivator binding	3/45	26/18337	3.45168e-05	0.000581475	0.000318616	SMAD4/TERT/ESR1	3		GO:0016303	1-phosphatidylinositol-3-kinase activity	2/32	10/18337	0.000131614	0.00171098	0.00100937	PIK3CA/ATM	2
hsa04151	PI3K-Akt signaling pathway	18/43	354/8109	4.85685e-14	6.07106e-13	2.41016e-13	EGFR/TP53/MET/PIK3CA/FGFR3/KRAS/KDR/ERBB2/HRAS/KIT/PDGFRA/NTRK1/STK11/NRAS/MAP2K1/FGFR2/MTOR/NOS3	18		hsa01522	Endocrine resistance	10/32	98/8109	2.15561e-12	2.61753e-11	9.23833e-12	TP53/ERBB2/KRAS/EGFR/PIK3CA/RB1/CDKN2A/HRAS/AKT1/BRAF	10		GO:0019887	protein kinase regulator activity	5/45	190/18337	9.8896e-05	0.00154702	0.00084768	CDKN2A/PIK3CA/APC/STK11/MAP2K1	5		GO:0043560	insulin receptor substrate binding	2/32	10/18337	0.000131614	0.00171098	0.00100937	PIK3CA/JAK2	2
hsa05205	Proteoglycans in cancer	15/43	205/8109	5.36235e-14	6.25607e-13	2.48361e-13	EGFR/TP53/CTNNB1/MET/PIK3CA/KRAS/SMO/KDR/ERBB2/HRAS/ESR1/BRAF/NRAS/MAP2K1/MTOR	15		hsa05214	Glioma	9/32	75/8109	7.1503e-12	8.10367e-11	2.86012e-11	TP53/KRAS/EGFR/PIK3CA/RB1/CDKN2A/HRAS/AKT1/BRAF	9		GO:0019902	phosphatase binding	5/45	193/18337	0.000106461	0.00155433	0.000851688	EGFR/TP53/CTNNB1/MET/ERBB2	5		GO:0031625	ubiquitin protein ligase binding	5/32	293/18337	0.0001423	0.00172657	0.00101857	TP53/EGFR/RB1/APC/FBXW7	5
hsa05212	Pancreatic cancer	11/43	76/8109	1.04831e-13	1.14659e-12	4.55188e-13	EGFR/RB1/TP53/CDKN2A/SMAD4/PIK3CA/KRAS/ERBB2/BRAF/MAP2K1/MTOR	11		hsa05220	Chronic myeloid leukemia	9/32	76/8109	8.08994e-12	8.59556e-11	3.03373e-11	TP53/KRAS/PIK3CA/RB1/CDKN2A/HRAS/AKT1/SMAD4/BRAF	9		GO:0047485	protein N-terminus binding	4/45	106/18337	0.000130968	0.00179262	0.000982257	TP53/TERT/ATM/MAP2K1	4		GO:0044389	ubiquitin-like protein ligase binding	5/32	312/18337	0.000190717	0.00206209	0.0012165	TP53/EGFR/RB1/APC/FBXW7	5
hsa05216	Thyroid cancer	9/43	37/8109	1.51693e-13	1.56155e-12	6.19923e-13	TP53/CTNNB1/KRAS/RET/HRAS/NTRK1/BRAF/NRAS/MAP2K1	9		hsa05216	Thyroid cancer	7/32	37/8109	7.00273e-11	7.00273e-10	2.47155e-10	TP53/KRAS/HRAS/NTRK1/RET/CTNNB1/BRAF	7		GO:0019207	kinase regulator activity	5/45	220/18337	0.000196342	0.00252935	0.00138595	CDKN2A/PIK3CA/APC/STK11/MAP2K1	5		GO:0035004	phosphatidylinositol 3-kinase activity	2/32	12/18337	0.000192613	0.00206209	0.0012165	PIK3CA/ATM	2
hsa04015	Rap1 signaling pathway	14/43	210/8109	1.60075e-12	1.55628e-11	6.17832e-12	EGFR/CTNNB1/MET/PIK3CA/FGFR3/KRAS/KDR/HRAS/KIT/PDGFRA/BRAF/NRAS/MAP2K1/FGFR2	14		hsa05205	Proteoglycans in cancer	11/32	205/8109	1.67222e-10	1.57932e-09	5.57408e-10	TP53/ERBB2/KRAS/EGFR/PIK3CA/HRAS/AKT1/KDR/CTNNB1/BRAF/MET	11		GO:0000014	single-stranded DNA endodeoxyribonuclease activity	2/45	10/18337	0.000261705	0.00286567	0.00157023	XRCC1/ERCC1	2		GO:0070411	I-SMAD binding	2/32	14/18337	0.000264994	0.00267938	0.00158066	CTNNB1/SMAD4	2
hsa05220	Chronic myeloid leukemia	10/43	76/8109	4.24944e-12	3.91396e-11	1.55381e-11	RB1/TP53/CDKN2A/SMAD4/PIK3CA/KRAS/HRAS/BRAF/NRAS/MAP2K1	10		hsa04015	Rap1 signaling pathway	11/32	210/8109	2.16779e-10	1.93961e-09	6.84567e-10	KRAS/EGFR/PIK3CA/KIT/HRAS/AKT1/KDR/CTNNB1/BRAF/MET/FGFR3	11		GO:0001094	TFIID-class transcription factor complex binding	2/45	10/18337	0.000261705	0.00286567	0.00157023	TP53/ERCC1	2		GO:0019887	protein kinase regulator activity	4/32	190/18337	0.000320013	0.00306538	0.00180838	PIK3CA/APC/CDKN2A/STK11	4
hsa04010	MAPK signaling pathway	15/43	294/8109	1.04656e-11	9.15743e-11	3.63543e-11	EGFR/TP53/MET/FGFR3/KRAS/KDR/ERBB2/HRAS/KIT/PDGFRA/NTRK1/BRAF/NRAS/MAP2K1/FGFR2	15		hsa04010	MAPK signaling pathway	12/32	294/8109	4.86892e-10	4.13858e-09	1.46068e-09	TP53/ERBB2/KRAS/EGFR/KIT/HRAS/NTRK1/AKT1/KDR/BRAF/MET/FGFR3	12		GO:0016303	1-phosphatidylinositol-3-kinase activity	2/45	10/18337	0.000261705	0.00286567	0.00157023	PIK3CA/ATM	2		GO:0030275	LRR domain binding	2/32	17/18337	0.000394741	0.00342109	0.00201823	KRAS/STK11	2
hsa05206	MicroRNAs in cancer	15/43	310/8109	2.2387e-11	1.86559e-10	7.40624e-11	EGFR/TP53/CDKN2A/MET/PIK3CA/FGFR3/KRAS/APC/ERBB2/HRAS/PDGFRA/ATM/NRAS/MAP2K1/MTOR	15		hsa04068	FoxO signaling pathway	9/32	131/8109	1.16487e-09	9.4299e-09	3.3282e-09	KRAS/EGFR/PIK3CA/HRAS/STK11/ATM/AKT1/SMAD4/BRAF	9		GO:0001085	RNA polymerase II transcription factor binding	3/45	52/18337	0.000280596	0.00292622	0.00160341	TP53/CTNNB1/SMAD4	3		GO:0052742	phosphatidylinositol kinase activity	2/32	17/18337	0.000394741	0.00342109	0.00201823	PIK3CA/ATM	2
hsa05163	Human cytomegalovirus infection	13/43	225/8109	7.16347e-11	5.69821e-10	2.26215e-10	EGFR/RB1/TP53/CDKN2A/CTNNB1/PIK3CA/KRAS/HRAS/PDGFRA/NRAS/GNA11/MAP2K1/MTOR	13		hsa04550	Signaling pathways regulating pluripotency of stem cells	9/32	143/8109	2.54582e-09	1.96723e-08	6.94315e-09	KRAS/PIK3CA/APC/JAK2/HRAS/AKT1/CTNNB1/SMAD4/FGFR3	9		GO:0140297	DNA-binding transcription factor binding	6/45	376/18337	0.000296005	0.00294659	0.00161457	RB1/TP53/CDKN2A/CTNNB1/SMAD4/ESR1	6		GO:0140297	DNA-binding transcription factor binding	5/32	376/18337	0.000450507	0.00372692	0.00219865	TP53/RB1/CDKN2A/CTNNB1/SMAD4	5
hsa04014	Ras signaling pathway	13/43	232/8109	1.05223e-10	8.00608e-10	3.17835e-10	EGFR/MET/PIK3CA/FGFR3/KRAS/KDR/HRAS/KIT/PDGFRA/NTRK1/NRAS/MAP2K1/FGFR2	13		hsa05160	Hepatitis C	9/32	157/8109	5.82491e-09	4.30537e-08	1.51954e-08	TP53/KRAS/EGFR/PIK3CA/RB1/HRAS/AKT1/CTNNB1/BRAF	9		GO:0035004	phosphatidylinositol 3-kinase activity	2/45	12/18337	0.000382636	0.00364336	0.00199636	PIK3CA/ATM	2		GO:0019207	kinase regulator activity	4/32	220/18337	0.000556969	0.00440732	0.00260004	PIK3CA/APC/CDKN2A/STK11	4
hsa04012	ErbB signaling pathway	9/43	85/8109	4.18358e-10	3.05053e-09	1.21104e-09	EGFR/PIK3CA/KRAS/ERBB2/HRAS/BRAF/NRAS/MAP2K1/MTOR	9		hsa05211	Renal cell carcinoma	7/32	69/8109	6.72845e-09	4.76598e-08	1.68211e-08	KRAS/PIK3CA/HRAS/VHL/AKT1/BRAF/MET	7		GO:0001221	transcription coregulator binding	3/45	61/18337	0.000449962	0.0041059	0.00224981	SMAD4/TERT/ESR1	3		GO:0047485	protein N-terminus binding	3/32	106/18337	0.000824323	0.00625112	0.00368776	TP53/ATM/TERT	3
hsa04068	FoxO signaling pathway	10/43	131/8109	1.04532e-09	7.31724e-09	2.90489e-09	EGFR/SMAD4/PIK3CA/KRAS/HRAS/STK11/BRAF/ATM/NRAS/MAP2K1	10		hsa05166	Human T-cell leukemia virus 1 infection	10/32	222/8109	7.35726e-09	5.00294e-08	1.76574e-08	TP53/KRAS/PIK3CA/RB1/CDKN2A/HRAS/ATM/TERT/AKT1/SMAD4	10		GO:0070411	I-SMAD binding	2/45	14/18337	0.000525928	0.00460713	0.00252445	CTNNB1/SMAD4	2		GO:0001223	transcription coactivator binding	2/32	26/18337	0.000934112	0.00680033	0.00401176	TERT/SMAD4	2
hsa05221	Acute myeloid leukemia	8/43	67/8109	1.63045e-09	1.09742e-08	4.35668e-09	PIK3CA/KRAS/HRAS/KIT/BRAF/NRAS/MAP2K1/MTOR	8		hsa05161	Hepatitis B	9/32	162/8109	7.68044e-09	5.02183e-08	1.77241e-08	TP53/KRAS/PIK3CA/RB1/JAK2/HRAS/AKT1/SMAD4/BRAF	9		GO:0001098	basal transcription machinery binding	3/45	69/18337	0.000646142	0.00524093	0.00287174	TP53/ESR1/ERCC1	3		GO:0051721	protein phosphatase 2A binding	2/32	31/18337	0.00132924	0.0093047	0.00548918	TP53/AKT1	2
hsa05211	Renal cell carcinoma	8/43	69/8109	2.07411e-09	1.34433e-08	5.33688e-09	VHL/MET/PIK3CA/KRAS/HRAS/BRAF/NRAS/MAP2K1	8		hsa04014	Ras signaling pathway	10/32	232/8109	1.12465e-08	7.0811e-08	2.49921e-08	KRAS/EGFR/PIK3CA/KIT/HRAS/NTRK1/AKT1/KDR/MET/FGFR3	10		GO:0001099	basal RNA polymerase II transcription machinery binding	3/45	69/18337	0.000646142	0.00524093	0.00287174	TP53/ESR1/ERCC1	3		GO:0097718	disordered domain specific binding	2/32	34/18337	0.00159844	0.0107747	0.00635637	TP53/RB1	2
hsa04550	Signaling pathways regulating pluripotency of stem cells	10/43	143/8109	2.4745e-09	1.54656e-08	6.13974e-09	CTNNB1/SMAD4/PIK3CA/FGFR3/KRAS/APC/HRAS/NRAS/MAP2K1/FGFR2	10		hsa05206	MicroRNAs in cancer	11/32	310/8109	1.34413e-08	8.16078e-08	2.88028e-08	TP53/ERBB2/KRAS/EGFR/PIK3CA/APC/CDKN2A/HRAS/ATM/MET/FGFR3	11		GO:0031625	ubiquitin protein ligase binding	5/45	293/18337	0.000728864	0.00570076	0.0031237	EGFR/RB1/TP53/APC/FBXW7	5		GO:0042169	SH2 domain binding	2/32	38/18337	0.00199434	0.0129632	0.00764747	KIT/JAK2	2
hsa04218	Cellular senescence	10/43	156/8109	5.78203e-09	3.48915e-08	1.38517e-08	RB1/TP53/CDKN2A/PIK3CA/KRAS/HRAS/ATM/NRAS/MAP2K1/MTOR	10		hsa05165	Human papillomavirus infection	11/32	331/8109	2.65582e-08	1.55686e-07	5.49481e-08	TP53/KRAS/EGFR/PIK3CA/RB1/APC/HRAS/ATM/TERT/AKT1/CTNNB1	11		GO:0030275	LRR domain binding	2/45	17/18337	0.000782328	0.005711	0.00312931	KRAS/STK11	2		GO:0045296	cadherin binding	4/32	332/18337	0.00254328	0.0159613	0.00941613	EGFR/IDH1/KDR/CTNNB1	4
hsa05160	Hepatitis C	10/43	157/8109	6.15222e-09	3.58879e-08	1.42472e-08	EGFR/RB1/TP53/CTNNB1/PIK3CA/KRAS/HRAS/BRAF/NRAS/MAP2K1	10		hsa04012	ErbB signaling pathway	7/32	85/8109	2.9473e-08	1.67013e-07	5.89459e-08	ERBB2/KRAS/EGFR/PIK3CA/HRAS/AKT1/BRAF	7		GO:0052742	phosphatidylinositol kinase activity	2/45	17/18337	0.000782328	0.005711	0.00312931	PIK3CA/ATM	2		GO:0001102	RNA polymerase II activating transcription factor binding	2/32	48/18337	0.00316542	0.0192036	0.0113289	RB1/CTNNB1	2
hsa05165	Human papillomavirus infection	13/43	331/8109	8.34581e-09	4.71135e-08	1.87037e-08	EGFR/RB1/TP53/CTNNB1/PIK3CA/KRAS/TERT/APC/HRAS/ATM/NRAS/MAP2K1/MTOR	13		hsa05235	PD-L1 expression and PD-1 checkpoint pathway in cancer	7/32	89/8109	4.06984e-08	2.23185e-07	7.8771e-08	KRAS/EGFR/PIK3CA/JAK2/HRAS/AKT1/ALK	7		GO:0019003	GDP binding	3/45	75/18337	0.000824238	0.00582285	0.0031906	KRAS/HRAS/NRAS	3		GO:0005516	calmodulin binding	3/32	198/18337	0.00488425	0.0286753	0.0169166	EGFR/NOS3/AKT1	3
hsa04919	Thyroid hormone signaling pathway	9/43	121/8109	1.00072e-08	5.47267e-08	2.17261e-08	TP53/CTNNB1/PIK3CA/KRAS/HRAS/ESR1/NRAS/MAP2K1/MTOR	9		hsa04510	Focal adhesion	9/32	201/8109	5.05675e-08	2.6864e-07	9.4814e-08	ERBB2/EGFR/PIK3CA/HRAS/AKT1/KDR/CTNNB1/BRAF/MET	9		GO:0044389	ubiquitin-like protein ligase binding	5/45	312/18337	0.000966092	0.00661169	0.00362284	EGFR/RB1/TP53/APC/FBXW7	5		GO:0001221	transcription coregulator binding	2/32	61/18337	0.00506341	0.0287981	0.0169891	TERT/SMAD4	2
hsa04810	Regulation of actin cytoskeleton	11/43	218/8109	1.11319e-08	5.90329e-08	2.34356e-08	EGFR/PIK3CA/FGFR3/KRAS/APC/HRAS/PDGFRA/BRAF/NRAS/MAP2K1/FGFR2	11		hsa04370	VEGF signaling pathway	6/32	59/8109	8.95044e-08	4.58824e-07	1.61938e-07	KRAS/PIK3CA/HRAS/NOS3/AKT1/KDR	6		GO:0050660	flavin adenine dinucleotide binding	3/45	81/18337	0.00103082	0.0068409	0.00374844	DPYD/MTHFR/NOS3	3		GO:0002039	p53 binding	2/32	66/18337	0.00590287	0.0325552	0.0192055	TP53/STK11	2
hsa05166	Human T-cell leukemia virus 1 infection	11/43	222/8109	1.34602e-08	6.92803e-08	2.75038e-08	RB1/TP53/CDKN2A/SMAD4/PIK3CA/KRAS/TERT/HRAS/ATM/NRAS/MAP2K1	11		hsa04933	AGE-RAGE signaling pathway in diabetic complications	7/32	100/8109	9.17648e-08	4.58824e-07	1.61938e-07	KRAS/PIK3CA/JAK2/HRAS/NOS3/AKT1/SMAD4	7		GO:0030295	protein kinase activator activity	3/45	84/18337	0.00114531	0.00737717	0.00404228	PIK3CA/STK11/MAP2K1	3		GO:0019003	GDP binding	2/32	75/18337	0.00756243	0.0404812	0.0238813	KRAS/HRAS	2
hsa05235	PD-L1 expression and PD-1 checkpoint pathway in cancer	8/43	89/8109	1.6216e-08	8.10798e-08	3.21881e-08	EGFR/PIK3CA/KRAS/HRAS/NRAS/ALK/MAP2K1/MTOR	8		hsa04218	Cellular senescence	8/32	156/8109	1.11434e-07	5.41251e-07	1.9103e-07	TP53/KRAS/PIK3CA/RB1/CDKN2A/HRAS/ATM/AKT1	8		GO:0008013	beta-catenin binding	3/45	85/18337	0.00118519	0.00741589	0.0040635	CTNNB1/APC/ESR1	3		GO:0046332	SMAD binding	2/32	77/18337	0.00795667	0.0412392	0.0243285	CTNNB1/SMAD4	2
hsa04370	VEGF signaling pathway	7/43	59/8109	1.96712e-08	9.5624e-08	3.7962e-08	PIK3CA/KRAS/KDR/HRAS/NRAS/MAP2K1/NOS3	7		hsa05163	Human cytomegalovirus infection	9/32	225/8109	1.33701e-07	6.31367e-07	2.22835e-07	TP53/KRAS/EGFR/PIK3CA/RB1/CDKN2A/HRAS/AKT1/CTNNB1	9		GO:0051219	phosphoprotein binding	3/45	87/18337	0.00126754	0.00771089	0.00422515	RB1/FBXW7/MTOR	3		GO:0033613	activating transcription factor binding	2/32	78/18337	0.00815721	0.0412392	0.0243285	RB1/CTNNB1	2
hsa04020	Calcium signaling pathway	11/43	240/8109	3.0262e-08	1.43131e-07	5.68219e-08	EGFR/MET/FGFR3/KDR/ERBB2/RET/PDGFRA/NTRK1/GNA11/FGFR2/NOS3	11		hsa05221	Acute myeloid leukemia	6/32	67/8109	1.93907e-07	8.90925e-07	3.14444e-07	KRAS/PIK3CA/KIT/HRAS/AKT1/BRAF	6		GO:0019209	kinase activator activity	3/45	90/18337	0.0013977	0.0082729	0.00453309	PIK3CA/STK11/MAP2K1	3		GO:0050660	flavin adenine dinucleotide binding	2/32	81/18337	0.00877244	0.0431509	0.0254563	NOS3/DPYD	2
hsa04915	Estrogen signaling pathway	9/43	138/8109	3.18141e-08	1.46512e-07	5.81643e-08	EGFR/ESR2/PIK3CA/KRAS/HRAS/ESR1/NRAS/MAP2K1/NOS3	9		hsa04722	Neurotrophin signaling pathway	7/32	119/8109	3.04941e-07	1.36421e-06	4.81486e-07	TP53/KRAS/PIK3CA/HRAS/NTRK1/AKT1/BRAF	7		GO:0017134	fibroblast growth factor binding	2/45	23/18337	0.0014418	0.00830931	0.00455305	FGFR3/FGFR2	2		GO:0030295	protein kinase activator activity	2/32	84/18337	0.00940788	0.0449127	0.0264956	PIK3CA/STK11	2
hsa05231	Choline metabolism in cancer	8/43	98/8109	3.48961e-08	1.53684e-07	6.10112e-08	EGFR/PIK3CA/KRAS/HRAS/PDGFRA/NRAS/MAP2K1/MTOR	8		hsa01524	Platinum drug resistance	6/32	73/8109	3.25327e-07	1.41809e-06	5.00503e-07	TP53/ERBB2/PIK3CA/CDKN2A/ATM/AKT1	6		GO:0003707	steroid hormone receptor activity	2/45	26/18337	0.00184347	0.0103518	0.00567221	ESR2/ESR1	2		GO:0008013	beta-catenin binding	2/32	85/18337	0.00962415	0.0449127	0.0264956	APC/CTNNB1	2
hsa04929	GnRH secretion	7/43	64/8109	3.51277e-08	1.53684e-07	6.10112e-08	ESR2/PIK3CA/KRAS/HRAS/NRAS/GNA11/MAP2K1	7		hsa05167	Kaposi sarcoma-associated herpesvirus infection	8/32	194/8109	5.97149e-07	2.53788e-06	8.95724e-07	TP53/KRAS/PIK3CA/RB1/JAK2/HRAS/AKT1/CTNNB1	8		GO:0001882	nucleoside binding	5/45	390/18337	0.002576	0.0141036	0.007728	KRAS/HRAS/NRAS/GNA11/CDA	5		GO:0051219	phosphoprotein binding	2/32	87/18337	0.0100633	0.0457881	0.0270121	RB1/FBXW7	2
hsa04072	Phospholipase D signaling pathway	9/43	148/8109	5.85382e-08	2.49858e-07	9.91918e-08	EGFR/PIK3CA/KRAS/HRAS/KIT/PDGFRA/NRAS/MAP2K1/MTOR	9		hsa04210	Apoptosis	7/32	136/8109	7.58511e-07	3.14505e-06	1.11002e-06	TP53/KRAS/PIK3CA/HRAS/ATM/NTRK1/AKT1	7		GO:0097718	disordered domain specific binding	2/45	34/18337	0.00314269	0.0167866	0.00919813	RB1/TP53	2		GO:0019209	kinase activator activity	2/32	90/18337	0.0107386	0.0476688	0.0281215	PIK3CA/STK11	2
hsa04510	Focal adhesion	10/43	201/8109	6.58232e-08	2.69485e-07	1.06984e-07	EGFR/CTNNB1/MET/PIK3CA/KDR/ERBB2/HRAS/PDGFRA/BRAF/MAP2K1	10		hsa05418	Fluid shear stress and atherosclerosis	7/32	139/8109	8.795e-07	3.55988e-06	1.25643e-06	TP53/PIK3CA/NOS3/AKT1/KDR/CTNNB1/NQO1	7		GO:0061629	RNA polymerase II-specific DNA-binding transcription factor binding	4/45	271/18337	0.00432005	0.0220472	0.0120807	RB1/CDKN2A/CTNNB1/ESR1	4
hsa04917	Prolactin signaling pathway	7/43	70/8109	6.62164e-08	2.69485e-07	1.06984e-07	ESR2/PIK3CA/KRAS/HRAS/ESR1/NRAS/MAP2K1	7		hsa04211	Longevity regulating pathway	6/32	89/8109	1.06251e-06	4.20061e-06	1.48257e-06	TP53/KRAS/PIK3CA/HRAS/STK11/AKT1	6		GO:0004520	endodeoxyribonuclease activity	2/45	40/18337	0.00432891	0.0220472	0.0120807	XRCC1/ERCC1	2
hsa01524	Platinum drug resistance	7/43	73/8109	8.89512e-08	3.53783e-07	1.40449e-07	TP53/CDKN2A/PIK3CA/ERBB2/MSH3/ATM/ERCC1	7		hsa05208	Chemical carcinogenesis - reactive oxygen species	8/32	223/8109	1.71687e-06	6.63338e-06	2.34119e-06	KRAS/EGFR/PIK3CA/HRAS/AKT1/BRAF/NQO1/MET	8		GO:0030331	estrogen receptor binding	2/45	41/18337	0.00454383	0.0226159	0.0123923	CTNNB1/ESR1	2
hsa05207	Chemical carcinogenesis - receptor activation	10/43	212/8109	1.08886e-07	4.23445e-07	1.68105e-07	EGFR/RB1/ESR2/PIK3CA/KRAS/HRAS/ESR1/NRAS/MAP2K1/MTOR	10		hsa04020	Calcium signaling pathway	8/32	240/8109	2.97945e-06	1.12557e-05	3.9726e-06	ERBB2/EGFR/NOS3/NTRK1/RET/KDR/MET/FGFR3	8		GO:0001102	RNA polymerase II activating transcription factor binding	2/45	48/18337	0.0061829	0.0300901	0.0164877	RB1/CTNNB1	2
hsa05161	Hepatitis B	9/43	162/8109	1.27921e-07	4.86656e-07	1.93199e-07	RB1/TP53/SMAD4/PIK3CA/KRAS/HRAS/BRAF/NRAS/MAP2K1	9		hsa04066	HIF-1 signaling pathway	6/32	109/8109	3.50329e-06	1.29469e-05	4.56951e-06	ERBB2/EGFR/PIK3CA/NOS3/VHL/AKT1	6		GO:0004879	nuclear receptor activity	2/45	52/18337	0.00722318	0.033657	0.0184422	ESR2/ESR1	2
hsa04722	Neurotrophin signaling pathway	8/43	119/8109	1.60328e-07	5.96964e-07	2.3699e-07	TP53/PIK3CA/KRAS/HRAS/NTRK1/BRAF/NRAS/MAP2K1	8		hsa04071	Sphingolipid signaling pathway	6/32	119/8109	5.83937e-06	2.11211e-05	7.45452e-06	TP53/KRAS/PIK3CA/HRAS/NOS3/AKT1	6		GO:0098531	ligand-activated transcription factor activity	2/45	52/18337	0.00722318	0.033657	0.0184422	ESR2/ESR1	2
hsa04540	Gap junction	7/43	88/8109	3.26841e-07	1.19161e-06	4.73059e-07	EGFR/KRAS/HRAS/PDGFRA/NRAS/GNA11/MAP2K1	7		hsa04919	Thyroid hormone signaling pathway	6/32	121/8109	6.43169e-06	2.27789e-05	8.03961e-06	TP53/KRAS/PIK3CA/HRAS/AKT1/CTNNB1	6		GO:0051287	NAD binding	2/45	53/18337	0.0074948	0.034195	0.018737	IDH2/IDH1	2
hsa04211	Longevity regulating pathway	7/43	89/8109	3.53357e-07	1.26199e-06	5.01001e-07	TP53/PIK3CA/KRAS/HRAS/STK11/NRAS/MTOR	7		hsa04917	Prolactin signaling pathway	5/32	70/8109	6.97003e-06	2.41817e-05	8.53473e-06	KRAS/PIK3CA/JAK2/HRAS/AKT1	5		GO:0003924	GTPase activity	4/45	322/18337	0.00789442	0.0352832	0.0193333	KRAS/HRAS/NRAS/GNA11	4
hsa04210	Apoptosis	8/43	136/8109	4.50432e-07	1.57651e-06	6.25864e-07	TP53/PIK3CA/KRAS/HRAS/NTRK1/ATM/NRAS/MAP2K1	8		hsa04520	Adherens junction	5/32	71/8109	7.47721e-06	2.54225e-05	8.97266e-06	ERBB2/EGFR/CTNNB1/SMAD4/MET	5		GO:0045296	cadherin binding	4/45	332/18337	0.00877019	0.0375712	0.020587	EGFR/CTNNB1/KDR/IDH1	4
hsa05167	Kaposi sarcoma-associated herpesvirus infection	9/43	194/8109	5.95294e-07	2.04267e-06	8.10927e-07	RB1/TP53/CTNNB1/PIK3CA/KRAS/HRAS/NRAS/MAP2K1/MTOR	9		hsa04926	Relaxin signaling pathway	6/32	129/8109	9.31039e-06	3.10346e-05	1.09534e-05	KRAS/EGFR/PIK3CA/HRAS/NOS3/AKT1	6		GO:0097110	scaffold protein binding	2/45	58/18337	0.00892102	0.0375712	0.020587	BRAF/MAP2K1	2
hsa04730	Long-term depression	6/43	60/8109	6.26477e-07	2.10834e-06	8.36994e-07	KRAS/HRAS/BRAF/NRAS/GNA11/MAP2K1	6		hsa04915	Estrogen signaling pathway	6/32	138/8109	1.3717e-05	4.48442e-05	1.58274e-05	KRAS/EGFR/PIK3CA/HRAS/NOS3/AKT1	6		GO:1990841	promoter-specific chromatin binding	2/45	58/18337	0.00892102	0.0375712	0.020587	TP53/ERCC1	2
hsa04150	mTOR signaling pathway	8/43	155/8109	1.22268e-06	3.96239e-06	1.57304e-06	PIK3CA/KRAS/HRAS/STK11/BRAF/NRAS/MAP2K1/MTOR	8		hsa05207	Chemical carcinogenesis - receptor activation	7/32	212/8109	1.45891e-05	4.67954e-05	1.6516e-05	KRAS/EGFR/PIK3CA/RB1/JAK2/HRAS/AKT1	7		GO:0004536	deoxyribonuclease activity	2/45	59/18337	0.00921973	0.0380966	0.0208749	XRCC1/ERCC1	2
hsa04934	Cushing syndrome	8/43	155/8109	1.22268e-06	3.96239e-06	1.57304e-06	EGFR/RB1/CDKN2A/CTNNB1/APC/BRAF/GNA11/MAP2K1	8		hsa05417	Lipid and atherosclerosis	7/32	215/8109	1.59879e-05	5.03323e-05	1.77643e-05	TP53/KRAS/PIK3CA/JAK2/HRAS/NOS3/AKT1	7		GO:0002039	p53 binding	2/45	66/18337	0.0114336	0.0455266	0.0249461	TP53/STK11	2
hsa04066	HIF-1 signaling pathway	7/43	109/8109	1.41309e-06	4.49621e-06	1.78496e-06	VHL/EGFR/PIK3CA/ERBB2/MAP2K1/MTOR/NOS3	7		hsa04810	Regulation of actin cytoskeleton	7/32	218/8109	1.74962e-05	5.40792e-05	1.90868e-05	KRAS/EGFR/PIK3CA/APC/HRAS/BRAF/FGFR3	7		GO:0003684	damaged DNA binding	2/45	66/18337	0.0114336	0.0455266	0.0249461	XRCC1/ERCC1	2
hsa05208	Chemical carcinogenesis - reactive oxygen species	9/43	223/8109	1.91287e-06	5.97771e-06	2.37311e-06	EGFR/MET/PIK3CA/KRAS/HRAS/BRAF/NRAS/MAP2K1/NQO1	9		hsa04072	Phospholipase D signaling pathway	6/32	148/8109	2.04546e-05	6.20944e-05	2.19157e-05	KRAS/EGFR/PIK3CA/KIT/HRAS/AKT1	6		GO:0005516	calmodulin binding	3/45	198/18337	0.0126152	0.0493344	0.0270325	EGFR/OBSCN/NOS3	3
hsa04071	Sphingolipid signaling pathway	7/43	119/8109	2.55462e-06	7.70791e-06	3.05998e-06	TP53/PIK3CA/KRAS/HRAS/NRAS/MAP2K1/NOS3	7		hsa04150	mTOR signaling pathway	6/32	155/8109	2.65961e-05	7.79541e-05	2.75132e-05	KRAS/PIK3CA/HRAS/STK11/AKT1/BRAF	6
hsa04935	Growth hormone synthesis, secretion and action	7/43	119/8109	2.55462e-06	7.70791e-06	3.05998e-06	PIK3CA/KRAS/HRAS/NRAS/GNA11/MAP2K1/MTOR	7		hsa04934	Cushing syndrome	6/32	155/8109	2.65961e-05	7.79541e-05	2.75132e-05	EGFR/RB1/APC/CDKN2A/CTNNB1/BRAF	6
hsa04926	Relaxin signaling pathway	7/43	129/8109	4.38306e-06	1.30006e-05	5.16115e-06	EGFR/PIK3CA/KRAS/HRAS/NRAS/MAP2K1/NOS3	7		hsa05231	Choline metabolism in cancer	5/32	98/8109	3.61751e-05	0.000104233	3.67882e-05	KRAS/EGFR/PIK3CA/HRAS/AKT1	5
hsa04910	Insulin signaling pathway	7/43	137/8109	6.53661e-06	1.90651e-05	7.5687e-06	PIK3CA/KRAS/HRAS/BRAF/NRAS/MAP2K1/MTOR	7		hsa04725	Cholinergic synapse	5/32	113/8109	7.17091e-05	0.000203176	7.17091e-05	KRAS/PIK3CA/JAK2/HRAS/AKT1	5
hsa04371	Apelin signaling pathway	7/43	139/8109	7.19446e-06	2.06398e-05	8.19386e-06	SMAD4/KRAS/HRAS/NRAS/MAP2K1/MTOR/NOS3	7		hsa04062	Chemokine signaling pathway	6/32	192/8109	8.83709e-05	0.000246279	8.69222e-05	KRAS/PIK3CA/JAK2/HRAS/AKT1/BRAF	6
hsa04140	Autophagy - animal	7/43	141/8109	7.90652e-06	2.23168e-05	8.8596e-06	PIK3CA/KRAS/HRAS/STK11/NRAS/MAP2K1/MTOR	7		hsa04935	Growth hormone synthesis, secretion and action	5/32	119/8109	9.17579e-05	0.000251594	8.8798e-05	KRAS/PIK3CA/JAK2/HRAS/AKT1	5
hsa04912	GnRH signaling pathway	6/43	93/8109	8.37881e-06	2.32745e-05	9.23979e-06	EGFR/KRAS/HRAS/NRAS/GNA11/MAP2K1	6		hsa04213	Longevity regulating pathway - multiple species	4/32	62/8109	9.49104e-05	0.000256108	9.03909e-05	KRAS/PIK3CA/HRAS/AKT1	4
hsa05170	Human immunodeficiency virus 1 infection	8/43	212/8109	1.26125e-05	3.43211e-05	1.36252e-05	PIK3CA/KRAS/HRAS/ATM/NRAS/GNA11/MAP2K1/MTOR	8		hsa04929	GnRH secretion	4/32	64/8109	0.000107505	0.000285561	0.000100786	KRAS/PIK3CA/HRAS/AKT1	4
hsa04933	AGE-RAGE signaling pathway in diabetic complications	6/43	100/8109	1.27479e-05	3.43211e-05	1.36252e-05	SMAD4/PIK3CA/KRAS/HRAS/NRAS/NOS3	6		hsa04110	Cell cycle	5/32	126/8109	0.000120328	0.000314703	0.000111072	TP53/RB1/CDKN2A/ATM/SMAD4	5
hsa04916	Melanogenesis	6/43	101/8109	1.34998e-05	3.5795e-05	1.42103e-05	CTNNB1/KRAS/HRAS/KIT/NRAS/MAP2K1	6		hsa05203	Viral carcinogenesis	6/32	204/8109	0.000123548	0.000318229	0.000112316	TP53/KRAS/PIK3CA/RB1/CDKN2A/HRAS	6
hsa04213	Longevity regulating pathway - multiple species	5/43	62/8109	1.70766e-05	4.4603e-05	1.77071e-05	PIK3CA/KRAS/HRAS/NRAS/MTOR	5		hsa04664	Fc epsilon RI signaling pathway	4/32	68/8109	0.000136278	0.00034578	0.00012204	KRAS/PIK3CA/HRAS/AKT1	4
hsa04720	Long-term potentiation	5/43	67/8109	2.49922e-05	6.43181e-05	2.55338e-05	KRAS/HRAS/BRAF/NRAS/MAP2K1	5		hsa04910	Insulin signaling pathway	5/32	137/8109	0.000178497	0.000446241	0.000157497	KRAS/PIK3CA/HRAS/AKT1/BRAF	5
hsa04725	Cholinergic synapse	6/43	113/8109	2.56734e-05	6.51136e-05	2.58496e-05	PIK3CA/KRAS/HRAS/NRAS/GNA11/MAP2K1	6		hsa04371	Apelin signaling pathway	5/32	139/8109	0.000191049	0.000470701	0.00016613	KRAS/HRAS/NOS3/AKT1/SMAD4	5
hsa04664	Fc epsilon RI signaling pathway	5/43	68/8109	2.68704e-05	6.71759e-05	2.66683e-05	PIK3CA/KRAS/HRAS/NRAS/MAP2K1	5		hsa04140	Autophagy - animal	5/32	141/8109	0.000204267	0.000496077	0.000175086	KRAS/PIK3CA/HRAS/STK11/AKT1	5
hsa04520	Adherens junction	5/43	71/8109	3.31699e-05	8.17568e-05	3.24568e-05	EGFR/CTNNB1/MET/SMAD4/ERBB2	5		hsa04662	B cell receptor signaling pathway	4/32	82/8109	0.000281574	0.000674192	0.00023795	KRAS/PIK3CA/HRAS/AKT1	4
hsa04650	Natural killer cell mediated cytotoxicity	6/43	131/8109	5.91668e-05	0.000143808	5.70908e-05	PIK3CA/KRAS/HRAS/BRAF/NRAS/MAP2K1	6		hsa04630	JAK-STAT signaling pathway	5/32	162/8109	0.000389329	0.000919249	0.000324441	EGFR/PIK3CA/JAK2/HRAS/AKT1	5
hsa04662	B cell receptor signaling pathway	5/43	82/8109	6.6585e-05	0.000159621	6.33685e-05	PIK3CA/KRAS/HRAS/NRAS/MAP2K1	5		hsa05222	Small cell lung cancer	4/32	92/8109	0.000437559	0.00101897	0.000359638	TP53/PIK3CA/RB1/AKT1	4
hsa05418	Fluid shear stress and atherosclerosis	6/43	139/8109	8.23798e-05	0.000194817	7.73409e-05	TP53/CTNNB1/PIK3CA/KDR/NOS3/NQO1	6		hsa05010	Alzheimer disease	7/32	384/8109	0.00060803	0.00139683	0.000492997	KRAS/PIK3CA/APC/HRAS/AKT1/CTNNB1/BRAF	7
hsa05203	Viral carcinogenesis	7/43	204/8109	8.59084e-05	0.000200453	7.95783e-05	RB1/TP53/CDKN2A/PIK3CA/KRAS/HRAS/NRAS	7		hsa04916	Melanogenesis	4/32	101/8109	0.000623674	0.00141366	0.00049894	KRAS/KIT/HRAS/CTNNB1	4
hsa04921	Oxytocin signaling pathway	6/43	154/8109	0.000145185	0.00033293	0.000132171	EGFR/KRAS/HRAS/NRAS/MAP2K1/NOS3	6		hsa04914	Progesterone-mediated oocyte maturation	4/32	102/8109	0.00064734	0.001448	0.000511058	KRAS/PIK3CA/AKT1/BRAF	4
hsa05010	Alzheimer disease	9/43	384/8109	0.000146489	0.00033293	0.000132171	CTNNB1/PIK3CA/KRAS/APC/HRAS/BRAF/NRAS/MAP2K1/MTOR	9		hsa04625	C-type lectin receptor signaling pathway	4/32	104/8109	0.000696575	0.00151818	0.000535827	KRAS/PIK3CA/HRAS/AKT1	4
hsa04660	T cell receptor signaling pathway	5/43	104/8109	0.000205916	0.000461991	0.000183407	PIK3CA/KRAS/HRAS/NRAS/MAP2K1	5		hsa04660	T cell receptor signaling pathway	4/32	104/8109	0.000696575	0.00151818	0.000535827	KRAS/PIK3CA/HRAS/AKT1	4
hsa05217	Basal cell carcinoma	4/43	63/8109	0.000325362	0.000720096	0.000285873	TP53/CTNNB1/APC/SMO	4		hsa05170	Human immunodeficiency virus 1 infection	5/32	212/8109	0.00131904	0.00283845	0.00100181	KRAS/PIK3CA/HRAS/ATM/AKT1	5
hsa04726	Serotonergic synapse	5/43	115/8109	0.000329187	0.000720096	0.000285873	KRAS/HRAS/BRAF/NRAS/MAP2K1	5		hsa00240	Pyrimidine metabolism	3/32	58/8109	0.00148662	0.00315906	0.00111496	CDA/DPYD/CMPK1	3
hsa04360	Axon guidance	6/43	182/8109	0.000359788	0.000777321	0.00030859	MET/PIK3CA/KRAS/SMO/HRAS/NRAS	6		hsa04730	Long-term depression	3/32	60/8109	0.0016399	0.00341541	0.00120544	KRAS/HRAS/BRAF	3
hsa04062	Chemokine signaling pathway	6/43	192/8109	0.000478896	0.00102203	0.00040574	PIK3CA/KRAS/HRAS/BRAF/NRAS/MAP2K1	6		hsa04650	Natural killer cell mediated cytotoxicity	4/32	131/8109	0.00164743	0.00341541	0.00120544	KRAS/PIK3CA/HRAS/BRAF	4
hsa04110	Cell cycle	5/43	126/8109	0.00050178	0.00105797	0.000420006	RB1/TP53/CDKN2A/SMAD4/ATM	5		hsa05217	Basal cell carcinoma	3/32	63/8109	0.00188784	0.00386666	0.0013647	TP53/APC/CTNNB1	3
hsa04137	Mitophagy - animal	4/43	72/8109	0.000542848	0.00113093	0.000448972	TP53/KRAS/HRAS/NRAS	4		hsa04720	Long-term potentiation	3/32	67/8109	0.00225316	0.00455997	0.0016094	KRAS/HRAS/BRAF	3
hsa05417	Lipid and atherosclerosis	6/43	215/8109	0.000869877	0.00179092	0.000710983	TP53/PIK3CA/KRAS/HRAS/NRAS/NOS3	6		hsa04920	Adipocytokine signaling pathway	3/32	69/8109	0.00245116	0.00490232	0.00173023	JAK2/STK11/AKT1	3
hsa04630	JAK-STAT signaling pathway	5/43	162/8109	0.00155949	0.00317338	0.00125981	EGFR/PIK3CA/HRAS/PDGFRA/MTOR	5		hsa05131	Shigellosis	5/32	247/8109	0.00258567	0.00511121	0.00180396	TP53/EGFR/PIK3CA/ATM/AKT1	5
hsa04914	Progesterone-mediated oocyte maturation	4/43	102/8109	0.00199859	0.00402014	0.00159597	PIK3CA/KRAS/BRAF/MAP2K1	4		hsa04137	Mitophagy - animal	3/32	72/8109	0.00276788	0.00540851	0.00190889	TP53/KRAS/HRAS	3
hsa04625	C-type lectin receptor signaling pathway	4/43	104/8109	0.002146	0.00426762	0.00169421	PIK3CA/KRAS/HRAS/NRAS	4		hsa04115	p53 signaling pathway	3/32	73/8109	0.00287881	0.00556134	0.00196282	TP53/CDKN2A/ATM	3
hsa04928	Parathyroid hormone synthesis, secretion and action	4/43	106/8109	0.00230079	0.00452403	0.001796	EGFR/BRAF/GNA11/MAP2K1	4		hsa04921	Oxytocin signaling pathway	4/32	154/8109	0.00297345	0.00567962	0.00200457	KRAS/EGFR/HRAS/NOS3	4
hsa05034	Alcoholism	5/43	187/8109	0.00292337	0.00568433	0.00225663	KRAS/HRAS/BRAF/NRAS/MAP2K1	5		hsa05100	Bacterial invasion of epithelial cells	3/32	77/8109	0.00334986	0.00632751	0.00223324	PIK3CA/CTNNB1/MET	3
hsa05022	Pathways of neurodegeneration - multiple diseases	8/43	476/8109	0.0031186	0.0059973	0.00238088	CTNNB1/KRAS/APC/HRAS/BRAF/NRAS/MAP2K1/MTOR	8		hsa00983	Drug metabolism - other enzymes	3/32	80/8109	0.00373246	0.00697272	0.00246096	CDA/DPYD/CMPK1	3
hsa01210	2-Oxocarboxylic acid metabolism	2/43	19/8109	0.00443573	0.00843753	0.00334963	IDH2/IDH1	2		hsa04310	Wnt signaling pathway	4/32	167/8109	0.0039793	0.00735306	0.0025952	TP53/APC/CTNNB1/SMAD4	4
hsa04115	p53 signaling pathway	3/43	73/8109	0.00667438	0.0125593	0.00498595	TP53/CDKN2A/ATM	3		hsa04540	Gap junction	3/32	88/8109	0.00487994	0.00892033	0.00314835	KRAS/EGFR/HRAS	3
hsa05100	Bacterial invasion of epithelial cells	3/43	77/8109	0.00773562	0.0144014	0.00571726	CTNNB1/MET/PIK3CA	3		hsa04360	Axon guidance	4/32	182/8109	0.00540219	0.00976992	0.00344821	KRAS/PIK3CA/HRAS/MET	4
hsa05131	Shigellosis	5/43	247/8109	0.00942585	0.0173634	0.00689314	EGFR/TP53/PIK3CA/ATM/MTOR	5		hsa04912	GnRH signaling pathway	3/32	93/8109	0.00569426	0.0101897	0.00359637	KRAS/EGFR/HRAS	3
hsa04144	Endocytosis	5/43	252/8109	0.0102268	0.0186426	0.00740096	EGFR/FGFR3/HRAS/PDGFRA/FGFR2	5		hsa05202	Transcriptional misregulation in cancer	4/32	192/8109	0.00652043	0.0115466	0.00407527	TP53/ATM/NTRK1/MET	4
hsa00020	Citrate cycle (TCA cycle)	2/43	30/8109	0.0108754	0.0196205	0.00778918	IDH2/IDH1	2		hsa05169	Epstein-Barr virus infection	4/32	202/8109	0.00778381	0.0136417	0.00481473	TP53/PIK3CA/RB1/AKT1	4
hsa04310	Wnt signaling pathway	4/43	167/8109	0.0114673	0.0204773	0.00812934	TP53/CTNNB1/SMAD4/APC	4		hsa04931	Insulin resistance	3/32	108/8109	0.00860771	0.0149317	0.00527002	PIK3CA/NOS3/AKT1	3
hsa05222	Small cell lung cancer	3/43	92/8109	0.0125708	0.0222212	0.00882163	RB1/TP53/PIK3CA	3		hsa04960	Aldosterone-regulated sodium reabsorption	2/32	37/8109	0.00921934	0.0158312	0.00558748	KRAS/PIK3CA	2
hsa04960	Aldosterone-regulated sodium reabsorption	2/43	37/8109	0.0162655	0.0284647	0.0113003	PIK3CA/KRAS	2		hsa04726	Serotonergic synapse	3/32	115/8109	0.010218	0.0173706	0.00613081	KRAS/HRAS/BRAF	3
hsa05202	Transcriptional misregulation in cancer	4/43	192/8109	0.018304	0.0317148	0.0125905	TP53/MET/NTRK1/ATM	4		hsa04152	AMPK signaling pathway	3/32	120/8109	0.0114689	0.0193041	0.00681322	PIK3CA/STK11/AKT1	3
hsa04931	Insulin resistance	3/43	108/8109	0.0192774	0.033074	0.0131301	PIK3CA/MTOR/NOS3	3		hsa04611	Platelet activation	3/32	124/8109	0.0125309	0.0208848	0.00737111	PIK3CA/NOS3/AKT1	3
hsa04930	Type II diabetes mellitus	2/43	46/8109	0.0245307	0.0416783	0.016546	PIK3CA/MTOR	2		hsa04973	Carbohydrate digestion and absorption	2/32	47/8109	0.0146022	0.0241007	0.00850613	PIK3CA/AKT1	2
hsa04152	AMPK signaling pathway	3/43	120/8109	0.0253851	0.0427153	0.0169576	PIK3CA/STK11/MTOR	3		hsa05132	Salmonella infection	4/32	249/8109	0.0158808	0.0259591	0.00916202	PIK3CA/HRAS/AKT1/CTNNB1	4
										hsa05162	Measles	3/32	139/8109	0.0170064	0.0275342	0.00971797	TP53/PIK3CA/AKT1	3
										hsa04923	Regulation of lipolysis in adipocytes	2/32	56/8109	0.02035	0.0326368	0.0115189	PIK3CA/AKT1	2
										hsa04390	Hippo signaling pathway	3/32	157/8109	0.0234227	0.0372136	0.0131342	APC/CTNNB1/SMAD4	3
										hsa05164	Influenza A	3/32	171/8109	0.0292096	0.0459781	0.0162276	PIK3CA/JAK2/AKT1	3
										hsa05120	Epithelial cell signaling in Helicobacter pylori infection	2/32	70/8109	0.0308423	0.0481027	0.0169774	EGFR/MET	2
