# Supplementary material for: The Landscape of Actionable Genomic Alterations by Next-Generation Sequencing in Tumor Tissue Versus Circulating Tumor DNA in Chinese Patients With Non-Small Cell Lung Cancer
Source: Front Oncol. 2022 Feb 22;11:751106. doi: 10.3389/fonc.2021.751106 (PMC8902245; doi:10.3389/fonc.2021.751106)
Supplement: Supplementary file 8 [file Table_6.xlsx]

## Sheet: Sheet1
Supplementary Table6 Signaling pathways enriched by KEGG analysis of all somatic mutated genes in tumor DNA from 176 LUAD patients.										Supplementary Table6 Signaling pathways enriched by KEGG analysis of all somatic mutated genes in cfDNA from 22 LUAD patients.										Supplementary Table6 Functional terms enriched by GO analysis of all somatic mutated genes in tumor DNA from 176 LUAD patients.										Supplementary Table6 Functional terms enriched by GO analysis of all somatic mutated genes in cfDNA from 22 LUAD patients.										Supplementary Table6 Signaling pathways enriched by KEGG analysis of all somatic mutated genes in tumor DNA from 102 LUSC patients.
ID	Description	GeneRatio	BgRatio	pvalue	p.adjust	qvalue	Gene	Count		ID	Description	GeneRatio	BgRatio	pvalue	p.adjust	qvalue	Gene	Count		ID	Description	GeneRatio	BgRatio	pvalue	p.adjust	qvalue	Gene	Count		ID	Description	GeneRatio	BgRatio	pvalue	p.adjust	qvalue	Gene	Count		ID	Description	GeneRatio	BgRatio	pvalue	p.adjust	qvalue	Gene	Count
hsa05230	Central carbon metabolism in cancer	17/41	70/8109	1.3129e-25	2.27132e-23	8.4302e-24	EGFR/TP53/MET/PIK3CA/FGFR3/KRAS/IDH2/ERBB2/RET/HRAS/KIT/PDGFRA/NTRK1/NRAS/MAP2K1/IDH1/MTOR	17		hsa05230	Central carbon metabolism in cancer	13/32	70/8109	1.39605e-19	1.76491e-17	6.22911e-18	TP53/ERBB2/KRAS/EGFR/PIK3CA/KIT/HRAS/NTRK1/IDH1/AKT1/RET/MET/FGFR3	13		GO:0004714	transmembrane receptor protein tyrosine kinase activity	10/43	61/18337	1.34593e-16	2.86683e-14	1.54427e-14	EGFR/MET/FGFR3/ERBB2/RET/KIT/PDGFRA/KDR/NTRK1/ALK	10		GO:0004714	transmembrane receptor protein tyrosine kinase activity	9/32	61/18337	7.11416e-16	1.29478e-13	7.63836e-14	ERBB2/EGFR/KIT/NTRK1/RET/KDR/ALK/MET/FGFR3	9		hsa05230	Central carbon metabolism in cancer	6/12	70/8109	2.95094e-10	1.27391e-08	4.85027e-09	EGFR/TP53/PIK3CA/KIT/FGFR2/NRAS	6
hsa05223	Non-small cell lung cancer	14/41	72/8109	1.4569e-19	1.26022e-17	4.67743e-18	EGFR/RB1/TP53/CDKN2A/MET/PIK3CA/KRAS/ERBB2/RET/HRAS/BRAF/NRAS/ALK/MAP2K1	14		hsa05223	Non-small cell lung cancer	13/32	72/8109	2.07637e-19	1.76491e-17	6.22911e-18	TP53/ERBB2/KRAS/EGFR/PIK3CA/RB1/CDKN2A/HRAS/AKT1/RET/ALK/BRAF/MET	13		GO:0019199	transmembrane receptor protein kinase activity	10/43	80/18337	2.38197e-15	2.5368e-13	1.3665e-13	EGFR/MET/FGFR3/ERBB2/RET/KIT/PDGFRA/KDR/NTRK1/ALK	10		GO:0019199	transmembrane receptor protein kinase activity	9/32	80/18337	9.31076e-15	8.47279e-13	4.99841e-13	ERBB2/EGFR/KIT/NTRK1/RET/KDR/ALK/MET/FGFR3	9		hsa05218	Melanoma	6/12	72/8109	3.51188e-10	1.27391e-08	4.85027e-09	EGFR/TP53/PIK3CA/CDKN2A/RB1/NRAS	6
hsa05225	Hepatocellular carcinoma	17/41	168/8109	1.039e-18	5.99154e-17	2.22382e-17	EGFR/RB1/TP53/CDKN2A/CTNNB1/MET/SMAD4/PIK3CA/KRAS/TERT/APC/HRAS/BRAF/NRAS/MAP2K1/MTOR/NQO1	17		hsa05225	Hepatocellular carcinoma	15/32	168/8109	1.2351e-17	6.99892e-16	2.47021e-16	TP53/KRAS/EGFR/PIK3CA/RB1/APC/CDKN2A/HRAS/TERT/AKT1/CTNNB1/SMAD4/BRAF/NQO1/MET	15		GO:0004713	protein tyrosine kinase activity	11/43	135/18337	1.07152e-14	7.60776e-13	4.09808e-13	EGFR/MET/FGFR3/ERBB2/RET/KIT/PDGFRA/KDR/NTRK1/ALK/MAP2K1	11		GO:0004713	protein tyrosine kinase activity	10/32	135/18337	1.87522e-14	1.13763e-12	6.71132e-13	ERBB2/EGFR/KIT/JAK2/NTRK1/RET/KDR/ALK/MET/FGFR3	10		hsa05223	Non-small cell lung cancer	6/12	72/8109	3.51188e-10	1.27391e-08	4.85027e-09	EGFR/TP53/PIK3CA/CDKN2A/RB1/NRAS	6
hsa05224	Breast cancer	16/41	147/8109	4.15624e-18	1.7957e-16	6.66492e-17	EGFR/RB1/TP53/CTNNB1/ESR2/PIK3CA/KRAS/APC/ERBB2/HRAS/KIT/ESR1/BRAF/NRAS/MAP2K1/MTOR	16		hsa05226	Gastric cancer	14/32	149/8109	9.57302e-17	4.06853e-15	1.43595e-15	TP53/ERBB2/KRAS/EGFR/PIK3CA/RB1/APC/HRAS/TERT/AKT1/CTNNB1/SMAD4/BRAF/MET	14		GO:0019838	growth factor binding	6/43	137/18337	7.56836e-07	4.03015e-05	2.17093e-05	EGFR/FGFR3/ERBB2/PDGFRA/KDR/NTRK1	6		GO:0019903	protein phosphatase binding	6/32	148/18337	1.90313e-07	8.65923e-06	5.10839e-06	TP53/ERBB2/EGFR/AKT1/CTNNB1/MET	6		hsa05226	Gastric cancer	7/12	149/8109	4.5052e-10	1.27391e-08	4.85027e-09	EGFR/TP53/PIK3CA/RB1/FGFR2/NRAS/TERT	7
hsa05226	Gastric cancer	16/41	149/8109	5.1899e-18	1.7957e-16	6.66492e-17	EGFR/RB1/TP53/CTNNB1/MET/SMAD4/PIK3CA/KRAS/TERT/APC/ERBB2/HRAS/BRAF/NRAS/MAP2K1/MTOR	16		hsa01521	EGFR tyrosine kinase inhibitor resistance	11/32	79/8109	3.99617e-15	1.3587e-13	4.7954e-14	ERBB2/KRAS/EGFR/PIK3CA/JAK2/HRAS/AKT1/KDR/BRAF/MET/FGFR3	11		GO:0140296	general transcription initiation factor binding	4/43	45/18337	3.64124e-06	0.000154318	8.31263e-05	TP53/ESR1/MTOR/ERCC1	4		GO:0019902	phosphatase binding	6/32	193/18337	9.07561e-07	3.30352e-05	1.94887e-05	TP53/ERBB2/EGFR/AKT1/CTNNB1/MET	6		hsa05214	Glioma	6/12	75/8109	4.51741e-10	1.27391e-08	4.85027e-09	EGFR/TP53/PIK3CA/CDKN2A/RB1/NRAS	6
hsa01522	Endocrine resistance	14/41	98/8109	1.46599e-17	4.22693e-16	1.56886e-16	EGFR/RB1/TP53/CDKN2A/ESR2/PIK3CA/KRAS/ERBB2/HRAS/ESR1/BRAF/NRAS/MAP2K1/MTOR	14		hsa05213	Endometrial cancer	10/32	58/8109	8.87133e-15	2.51354e-13	8.87133e-14	TP53/ERBB2/KRAS/EGFR/PIK3CA/APC/HRAS/AKT1/CTNNB1/BRAF	10		GO:0008022	protein C-terminus binding	6/43	185/18337	4.34697e-06	0.000154318	8.31263e-05	CTNNB1/TERT/ERBB2/HRAS/MAP2K1/ERCC1	6		GO:0019838	growth factor binding	5/32	137/18337	3.70423e-06	0.000112362	6.62862e-05	ERBB2/EGFR/NTRK1/KDR/FGFR3	5		hsa05225	Hepatocellular carcinoma	7/12	168/8109	1.04995e-09	2.46738e-08	9.39427e-09	EGFR/TP53/PIK3CA/CDKN2A/RB1/NRAS/TERT	7
hsa01521	EGFR tyrosine kinase inhibitor resistance	13/41	79/8109	3.60478e-17	7.85718e-16	2.91626e-16	EGFR/MET/PIK3CA/FGFR3/KRAS/ERBB2/HRAS/PDGFRA/KDR/BRAF/NRAS/MAP2K1/MTOR	13		hsa05219	Bladder cancer	9/32	41/8109	2.17664e-14	5.28612e-13	1.86569e-13	TP53/ERBB2/KRAS/EGFR/RB1/CDKN2A/HRAS/BRAF/FGFR3	9		GO:0004674	protein serine/threonine kinase activity	8/43	430/18337	6.04821e-06	0.000184038	9.91361e-05	EGFR/PIK3CA/OBSCN/STK11/BRAF/ATM/MAP2K1/MTOR	8		GO:0008022	protein C-terminus binding	5/32	185/18337	1.59843e-05	0.000415593	0.000245173	ERBB2/JAK2/HRAS/TERT/CTNNB1	5		hsa05219	Bladder cancer	5/12	41/8109	1.98172e-09	3.64565e-08	1.38804e-08	EGFR/TP53/CDKN2A/RB1/NRAS	5
hsa05219	Bladder cancer	11/41	41/8109	3.63338e-17	7.85718e-16	2.91626e-16	EGFR/RB1/TP53/CDKN2A/FGFR3/KRAS/ERBB2/HRAS/BRAF/NRAS/MAP2K1	11		hsa05218	Melanoma	10/32	72/8109	8.80473e-14	1.87101e-12	6.60355e-13	TP53/KRAS/EGFR/PIK3CA/RB1/CDKN2A/HRAS/AKT1/BRAF/MET	10		GO:0001091	RNA polymerase II general transcription initiation factor binding	3/43	19/18337	1.1338e-05	0.000301875	0.000162611	TP53/ESR1/ERCC1	3		GO:0106311	protein threonine kinase activity	5/32	248/18337	6.49336e-05	0.00133836	0.000789548	PIK3CA/STK11/ATM/AKT1/BRAF	5		hsa05215	Prostate cancer	6/12	97/8109	2.18594e-09	3.64565e-08	1.38804e-08	EGFR/TP53/PIK3CA/RB1/FGFR2/NRAS	6
hsa05210	Colorectal cancer	13/41	86/8109	1.16212e-16	2.23386e-15	8.29118e-16	EGFR/TP53/CTNNB1/SMAD4/PIK3CA/KRAS/APC/MSH3/HRAS/BRAF/NRAS/MAP2K1/MTOR	13		hsa05224	Breast cancer	12/32	147/8109	1.32562e-13	2.50396e-12	8.8375e-13	TP53/ERBB2/KRAS/EGFR/PIK3CA/RB1/APC/KIT/HRAS/AKT1/CTNNB1/BRAF	12		GO:0106311	protein threonine kinase activity	6/43	248/18337	2.30938e-05	0.000465959	0.000250999	PIK3CA/OBSCN/STK11/BRAF/ATM/MTOR	6		GO:0106310	protein serine kinase activity	5/32	249/18337	6.61827e-05	0.00133836	0.000789548	PIK3CA/STK11/ATM/AKT1/BRAF	5		hsa01522	Endocrine resistance	6/12	98/8109	2.32701e-09	3.64565e-08	1.38804e-08	EGFR/TP53/PIK3CA/CDKN2A/RB1/NRAS	6
hsa05218	Melanoma	12/41	72/8109	5.93977e-16	9.44488e-15	3.50555e-15	EGFR/RB1/TP53/CDKN2A/MET/PIK3CA/KRAS/HRAS/PDGFRA/BRAF/NRAS/MAP2K1	12		hsa05212	Pancreatic cancer	10/32	76/8109	1.55184e-13	2.63813e-12	9.31105e-13	TP53/ERBB2/KRAS/EGFR/PIK3CA/RB1/CDKN2A/AKT1/SMAD4/BRAF	10		GO:0106310	protein serine kinase activity	6/43	249/18337	2.36229e-05	0.000465959	0.000250999	PIK3CA/OBSCN/STK11/BRAF/ATM/MTOR	6		GO:0004674	protein serine/threonine kinase activity	6/32	430/18337	8.67345e-05	0.00157857	0.000931254	EGFR/PIK3CA/STK11/ATM/AKT1/BRAF	6		hsa05224	Breast cancer	6/12	147/8109	2.70744e-08	3.81749e-07	1.45347e-07	EGFR/TP53/PIK3CA/RB1/KIT/NRAS	6
hsa05215	Prostate cancer	13/41	97/8109	6.00541e-16	9.44488e-15	3.50555e-15	EGFR/RB1/TP53/CTNNB1/PIK3CA/KRAS/ERBB2/HRAS/PDGFRA/BRAF/NRAS/MAP2K1/MTOR	13		hsa05210	Colorectal cancer	10/32	86/8109	5.61519e-13	8.67801e-12	3.06283e-12	TP53/KRAS/EGFR/PIK3CA/APC/HRAS/AKT1/CTNNB1/SMAD4/BRAF	10		GO:0019903	protein phosphatase binding	5/43	148/18337	2.40636e-05	0.000465959	0.000250999	EGFR/TP53/CTNNB1/MET/ERBB2	5		GO:0001085	RNA polymerase II transcription factor binding	3/32	52/18337	0.000100664	0.00161642	0.000953585	TP53/CTNNB1/SMAD4	3		hsa05212	Pancreatic cancer	5/12	76/8109	4.7634e-08	5.59699e-07	2.13099e-07	EGFR/TP53/PIK3CA/CDKN2A/RB1	5
hsa05214	Glioma	12/41	75/8109	9.99962e-16	1.44161e-14	5.35068e-15	EGFR/RB1/TP53/CDKN2A/PIK3CA/KRAS/HRAS/PDGFRA/BRAF/NRAS/MAP2K1/MTOR	12		hsa04151	PI3K-Akt signaling pathway	15/32	354/8109	8.56119e-13	1.21284e-11	4.2806e-12	TP53/ERBB2/KRAS/EGFR/PIK3CA/KIT/JAK2/HRAS/STK11/NOS3/NTRK1/AKT1/KDR/MET/FGFR3	15		GO:0001223	transcription coactivator binding	3/43	26/18337	3.00756e-05	0.000533843	0.000287565	SMAD4/TERT/ESR1	3		GO:0050661	NADP binding	3/32	53/18337	0.000106577	0.00161642	0.000953585	NOS3/IDH1/DPYD	3		hsa05220	Chronic myeloid leukemia	5/12	76/8109	4.7634e-08	5.59699e-07	2.13099e-07	TP53/PIK3CA/CDKN2A/RB1/NRAS	5
hsa05213	Endometrial cancer	11/41	58/8109	2.47084e-15	3.28812e-14	1.22042e-14	EGFR/TP53/CTNNB1/PIK3CA/KRAS/APC/ERBB2/HRAS/BRAF/NRAS/MAP2K1	11		hsa05215	Prostate cancer	10/32	97/8109	1.94048e-12	2.53755e-11	8.95606e-12	TP53/ERBB2/KRAS/EGFR/PIK3CA/RB1/HRAS/AKT1/CTNNB1/BRAF	10		GO:0019887	protein kinase regulator activity	5/43	190/18337	7.92347e-05	0.00129806	0.000699229	CDKN2A/PIK3CA/APC/STK11/MAP2K1	5		GO:0016303	1-phosphatidylinositol-3-kinase activity	2/32	10/18337	0.000131614	0.00171098	0.00100937	PIK3CA/ATM	2		hsa01521	EGFR tyrosine kinase inhibitor resistance	5/12	79/8109	5.79827e-08	6.28889e-07	2.39443e-07	EGFR/PIK3CA/KDR/FGFR2/NRAS	5
hsa05205	Proteoglycans in cancer	15/41	205/8109	2.34693e-14	2.90014e-13	1.07641e-13	EGFR/TP53/CTNNB1/MET/PIK3CA/KRAS/SMO/ERBB2/HRAS/KDR/ESR1/BRAF/NRAS/MAP2K1/MTOR	15		hsa01522	Endocrine resistance	10/32	98/8109	2.15561e-12	2.61753e-11	9.23833e-12	TP53/ERBB2/KRAS/EGFR/PIK3CA/RB1/CDKN2A/HRAS/AKT1/BRAF	10		GO:0019902	phosphatase binding	5/43	193/18337	8.53188e-05	0.00129806	0.000699229	EGFR/TP53/CTNNB1/MET/ERBB2	5		GO:0043560	insulin receptor substrate binding	2/32	10/18337	0.000131614	0.00171098	0.00100937	PIK3CA/JAK2	2		hsa04151	PI3K-Akt signaling pathway	7/12	354/8109	1.86778e-07	1.88112e-06	7.16216e-07	EGFR/TP53/PIK3CA/KDR/KIT/FGFR2/NRAS	7
hsa05212	Pancreatic cancer	11/41	76/8109	5.84401e-14	6.74009e-13	2.50165e-13	EGFR/RB1/TP53/CDKN2A/SMAD4/PIK3CA/KRAS/ERBB2/BRAF/MAP2K1/MTOR	11		hsa05214	Glioma	9/32	75/8109	7.1503e-12	8.10367e-11	2.86012e-11	TP53/KRAS/EGFR/PIK3CA/RB1/CDKN2A/HRAS/AKT1/BRAF	9		GO:0047485	protein N-terminus binding	4/43	106/18337	0.000109445	0.00155411	0.000837156	TP53/TERT/ATM/MAP2K1	4		GO:0031625	ubiquitin protein ligase binding	5/32	293/18337	0.0001423	0.00172657	0.00101857	TP53/EGFR/RB1/APC/FBXW7	5		hsa04015	Rap1 signaling pathway	6/12	210/8109	2.2798e-07	2.14301e-06	8.15928e-07	EGFR/PIK3CA/KDR/KIT/FGFR2/NRAS	6
hsa05216	Thyroid cancer	9/41	37/8109	9.48321e-14	1.02537e-12	3.80576e-13	TP53/CTNNB1/KRAS/RET/HRAS/NTRK1/BRAF/NRAS/MAP2K1	9		hsa05220	Chronic myeloid leukemia	9/32	76/8109	8.08994e-12	8.59556e-11	3.03373e-11	TP53/KRAS/PIK3CA/RB1/CDKN2A/HRAS/AKT1/SMAD4/BRAF	9		GO:0019207	kinase regulator activity	5/43	220/18337	0.000157733	0.00209982	0.00113111	CDKN2A/PIK3CA/APC/STK11/MAP2K1	5		GO:0044389	ubiquitin-like protein ligase binding	5/32	312/18337	0.000190717	0.00206209	0.0012165	TP53/EGFR/RB1/APC/FBXW7	5		hsa05166	Human T-cell leukemia virus 1 infection	6/12	222/8109	3.16978e-07	2.79337e-06	1.06354e-06	TP53/PIK3CA/CDKN2A/RB1/NRAS/TERT	6
hsa04151	PI3K-Akt signaling pathway	17/41	354/8109	3.02606e-13	3.07946e-12	1.14297e-12	EGFR/TP53/MET/PIK3CA/FGFR3/KRAS/ERBB2/HRAS/KIT/PDGFRA/KDR/NTRK1/STK11/NRAS/MAP2K1/MTOR/NOS3	17		hsa05216	Thyroid cancer	7/32	37/8109	7.00273e-11	7.00273e-10	2.47155e-10	TP53/KRAS/HRAS/NTRK1/RET/CTNNB1/BRAF	7		GO:0140297	DNA-binding transcription factor binding	6/43	376/18337	0.000229321	0.00248511	0.00133866	RB1/TP53/CDKN2A/CTNNB1/SMAD4/ESR1	6		GO:0035004	phosphatidylinositol 3-kinase activity	2/32	12/18337	0.000192613	0.00206209	0.0012165	PIK3CA/ATM	2		hsa05163	Human cytomegalovirus infection	6/12	225/8109	3.4321e-07	2.84662e-06	1.08382e-06	EGFR/TP53/PIK3CA/CDKN2A/RB1/NRAS	6
hsa05220	Chronic myeloid leukemia	10/41	76/8109	2.52201e-12	2.42393e-11	8.99665e-12	RB1/TP53/CDKN2A/SMAD4/PIK3CA/KRAS/HRAS/BRAF/NRAS/MAP2K1	10		hsa05205	Proteoglycans in cancer	11/32	205/8109	1.67222e-10	1.57932e-09	5.57408e-10	TP53/ERBB2/KRAS/EGFR/PIK3CA/HRAS/AKT1/KDR/CTNNB1/BRAF/MET	11		GO:0000014	single-stranded DNA endodeoxyribonuclease activity	2/43	10/18337	0.000238845	0.00248511	0.00133866	XRCC1/ERCC1	2		GO:0070411	I-SMAD binding	2/32	14/18337	0.000264994	0.00267938	0.00158066	CTNNB1/SMAD4	2		hsa04014	Ras signaling pathway	6/12	232/8109	4.11442e-07	3.22297e-06	1.22711e-06	EGFR/PIK3CA/KDR/KIT/FGFR2/NRAS	6
hsa05206	MicroRNAs in cancer	15/41	310/8109	1.00455e-11	9.14673e-11	3.39489e-11	EGFR/TP53/CDKN2A/MET/PIK3CA/FGFR3/KRAS/APC/ERBB2/HRAS/PDGFRA/ATM/NRAS/MAP2K1/MTOR	15		hsa04015	Rap1 signaling pathway	11/32	210/8109	2.16779e-10	1.93961e-09	6.84567e-10	KRAS/EGFR/PIK3CA/KIT/HRAS/AKT1/KDR/CTNNB1/BRAF/MET/FGFR3	11		GO:0001094	TFIID-class transcription factor complex binding	2/43	10/18337	0.000238845	0.00248511	0.00133866	TP53/ERCC1	2		GO:0019887	protein kinase regulator activity	4/32	190/18337	0.000320013	0.00306538	0.00180838	PIK3CA/APC/CDKN2A/STK11	4		hsa05213	Endometrial cancer	4/12	58/8109	1.11777e-06	8.295e-06	3.15823e-06	EGFR/TP53/PIK3CA/NRAS	4
hsa04015	Rap1 signaling pathway	13/41	210/8109	1.51345e-11	1.30914e-10	4.85898e-11	EGFR/CTNNB1/MET/PIK3CA/FGFR3/KRAS/HRAS/KIT/PDGFRA/KDR/BRAF/NRAS/MAP2K1	13		hsa04010	MAPK signaling pathway	12/32	294/8109	4.86892e-10	4.13858e-09	1.46068e-09	TP53/ERBB2/KRAS/EGFR/KIT/HRAS/NTRK1/AKT1/KDR/BRAF/MET/FGFR3	12		GO:0016303	1-phosphatidylinositol-3-kinase activity	2/43	10/18337	0.000238845	0.00248511	0.00133866	PIK3CA/ATM	2		GO:0030275	LRR domain binding	2/32	17/18337	0.000394741	0.00342109	0.00201823	KRAS/STK11	2		hsa04010	MAPK signaling pathway	6/12	294/8109	1.65941e-06	1.16131e-05	4.42156e-06	EGFR/TP53/KDR/KIT/FGFR2/NRAS	6
hsa05163	Human cytomegalovirus infection	13/41	225/8109	3.62489e-11	2.98622e-10	1.10836e-10	EGFR/RB1/TP53/CDKN2A/CTNNB1/PIK3CA/KRAS/HRAS/PDGFRA/NRAS/GNA11/MAP2K1/MTOR	13		hsa04068	FoxO signaling pathway	9/32	131/8109	1.16487e-09	9.4299e-09	3.3282e-09	KRAS/EGFR/PIK3CA/HRAS/STK11/ATM/AKT1/SMAD4/BRAF	9		GO:0001085	RNA polymerase II transcription factor binding	3/43	52/18337	0.000245011	0.00248511	0.00133866	TP53/CTNNB1/SMAD4	3		GO:0052742	phosphatidylinositol kinase activity	2/32	17/18337	0.000394741	0.00342109	0.00201823	PIK3CA/ATM	2		hsa04218	Cellular senescence	5/12	156/8109	1.75555e-06	1.16131e-05	4.42156e-06	TP53/PIK3CA/CDKN2A/RB1/NRAS	5
hsa04010	MAPK signaling pathway	14/41	294/8109	7.27953e-11	5.72435e-10	2.12465e-10	EGFR/TP53/MET/FGFR3/KRAS/ERBB2/HRAS/KIT/PDGFRA/KDR/NTRK1/BRAF/NRAS/MAP2K1	14		hsa04550	Signaling pathways regulating pluripotency of stem cells	9/32	143/8109	2.54582e-09	1.96723e-08	6.94315e-09	KRAS/PIK3CA/APC/JAK2/HRAS/AKT1/CTNNB1/SMAD4/FGFR3	9		GO:0050661	NADP binding	3/43	53/18337	0.000259288	0.00251038	0.00135227	DPYD/IDH1/NOS3	3		GO:0140297	DNA-binding transcription factor binding	5/32	376/18337	0.000450507	0.00372692	0.00219865	TP53/RB1/CDKN2A/CTNNB1/SMAD4	5		hsa05160	Hepatitis C	5/12	157/8109	1.81197e-06	1.16131e-05	4.42156e-06	EGFR/TP53/PIK3CA/RB1/NRAS	5
hsa04012	ErbB signaling pathway	9/41	85/8109	2.6436e-10	1.98844e-09	7.38029e-10	EGFR/PIK3CA/KRAS/ERBB2/HRAS/BRAF/NRAS/MAP2K1/MTOR	9		hsa05160	Hepatitis C	9/32	157/8109	5.82491e-09	4.30537e-08	1.51954e-08	TP53/KRAS/EGFR/PIK3CA/RB1/HRAS/AKT1/CTNNB1/BRAF	9		GO:0035004	phosphatidylinositol 3-kinase activity	2/43	12/18337	0.000349264	0.00323449	0.00174232	PIK3CA/ATM	2		GO:0019207	kinase regulator activity	4/32	220/18337	0.000556969	0.00440732	0.00260004	PIK3CA/APC/CDKN2A/STK11	4		hsa05165	Human papillomavirus infection	6/12	331/8109	3.31771e-06	2.0339e-05	7.74385e-06	EGFR/TP53/PIK3CA/RB1/NRAS/TERT	6
hsa04068	FoxO signaling pathway	10/41	131/8109	6.28161e-10	4.52799e-09	1.68061e-09	EGFR/SMAD4/PIK3CA/KRAS/HRAS/STK11/BRAF/ATM/NRAS/MAP2K1	10		hsa05211	Renal cell carcinoma	7/32	69/8109	6.72845e-09	4.76598e-08	1.68211e-08	KRAS/PIK3CA/HRAS/VHL/AKT1/BRAF/MET	7		GO:0001221	transcription coregulator binding	3/43	61/18337	0.000393185	0.00348952	0.0018797	SMAD4/TERT/ESR1	3		GO:0047485	protein N-terminus binding	3/32	106/18337	0.000824323	0.00625112	0.00368776	TP53/ATM/TERT	3		hsa05210	Colorectal cancer	4/12	86/8109	5.47168e-06	3.21461e-05	1.22393e-05	EGFR/TP53/PIK3CA/NRAS	4
hsa04014	Ras signaling pathway	12/41	232/8109	8.58989e-10	5.9442e-09	2.20625e-09	EGFR/MET/PIK3CA/FGFR3/KRAS/HRAS/KIT/PDGFRA/KDR/NTRK1/NRAS/MAP2K1	12		hsa05166	Human T-cell leukemia virus 1 infection	10/32	222/8109	7.35726e-09	5.00294e-08	1.76574e-08	TP53/KRAS/PIK3CA/RB1/CDKN2A/HRAS/ATM/TERT/AKT1/SMAD4	10		GO:0070411	I-SMAD binding	2/43	14/18337	0.000480129	0.00409069	0.00220354	CTNNB1/SMAD4	2		GO:0001223	transcription coactivator binding	2/32	26/18337	0.000934112	0.00680033	0.00401176	TERT/SMAD4	2		hsa05203	Viral carcinogenesis	5/12	204/8109	6.58215e-06	3.65611e-05	1.39202e-05	TP53/PIK3CA/CDKN2A/RB1/NRAS	5
hsa05221	Acute myeloid leukemia	8/41	67/8109	1.08839e-09	7.24198e-09	2.68793e-09	PIK3CA/KRAS/HRAS/KIT/BRAF/NRAS/MAP2K1/MTOR	8		hsa05161	Hepatitis B	9/32	162/8109	7.68044e-09	5.02183e-08	1.77241e-08	TP53/KRAS/PIK3CA/RB1/JAK2/HRAS/AKT1/SMAD4/BRAF	9		GO:0001098	basal transcription machinery binding	3/43	69/18337	0.000564977	0.00445704	0.00240088	TP53/ESR1/ERCC1	3		GO:0051721	protein phosphatase 2A binding	2/32	31/18337	0.00132924	0.0093047	0.00548918	TP53/AKT1	2		hsa05205	Proteoglycans in cancer	5/12	205/8109	6.74177e-06	3.65611e-05	1.39202e-05	EGFR/TP53/PIK3CA/KDR/NRAS	5
hsa05211	Renal cell carcinoma	8/41	69/8109	1.38516e-09	8.87526e-09	3.29413e-09	VHL/MET/PIK3CA/KRAS/HRAS/BRAF/NRAS/MAP2K1	8		hsa04014	Ras signaling pathway	10/32	232/8109	1.12465e-08	7.0811e-08	2.49921e-08	KRAS/EGFR/PIK3CA/KIT/HRAS/NTRK1/AKT1/KDR/MET/FGFR3	10		GO:0001099	basal RNA polymerase II transcription machinery binding	3/43	69/18337	0.000564977	0.00445704	0.00240088	TP53/ESR1/ERCC1	3		GO:0097718	disordered domain specific binding	2/32	34/18337	0.00159844	0.0107747	0.00635637	TP53/RB1	2		hsa04072	Phospholipase D signaling pathway	4/12	148/8109	4.70661e-05	0.00024579	9.35818e-05	EGFR/PIK3CA/KIT/NRAS	4
hsa04218	Cellular senescence	10/41	156/8109	3.49433e-09	2.159e-08	8.01332e-09	RB1/TP53/CDKN2A/PIK3CA/KRAS/HRAS/ATM/NRAS/MAP2K1/MTOR	10		hsa05206	MicroRNAs in cancer	11/32	310/8109	1.34413e-08	8.16078e-08	2.88028e-08	TP53/ERBB2/KRAS/EGFR/PIK3CA/APC/CDKN2A/HRAS/ATM/MET/FGFR3	11		GO:0031625	ubiquitin protein ligase binding	5/43	293/18337	0.00058938	0.0044835	0.00241513	EGFR/RB1/TP53/APC/FBXW7	5		GO:0042169	SH2 domain binding	2/32	38/18337	0.00199434	0.0129632	0.00764747	KIT/JAK2	2		hsa05206	MicroRNAs in cancer	5/12	310/8109	5.01796e-05	0.00025269	9.6209e-05	EGFR/TP53/PIK3CA/CDKN2A/NRAS	5
hsa05160	Hepatitis C	10/41	157/8109	3.7189e-09	2.21851e-08	8.23422e-09	EGFR/RB1/TP53/CTNNB1/PIK3CA/KRAS/HRAS/BRAF/NRAS/MAP2K1	10		hsa05165	Human papillomavirus infection	11/32	331/8109	2.65582e-08	1.55686e-07	5.49481e-08	TP53/KRAS/EGFR/PIK3CA/RB1/APC/HRAS/ATM/TERT/AKT1/CTNNB1	11		GO:0030275	LRR domain binding	2/43	17/18337	0.000714356	0.00495432	0.00266875	KRAS/STK11	2		GO:0045296	cadherin binding	4/32	332/18337	0.00254328	0.0159613	0.00941613	EGFR/IDH1/KDR/CTNNB1	4		hsa05161	Hepatitis B	4/12	162/8109	6.70522e-05	0.000326013	0.000124126	TP53/PIK3CA/RB1/NRAS	4
hsa05165	Human papillomavirus infection	13/41	331/8109	4.32968e-09	2.49678e-08	9.26702e-09	EGFR/RB1/TP53/CTNNB1/PIK3CA/KRAS/TERT/APC/HRAS/ATM/NRAS/MAP2K1/MTOR	13		hsa04012	ErbB signaling pathway	7/32	85/8109	2.9473e-08	1.67013e-07	5.89459e-08	ERBB2/KRAS/EGFR/PIK3CA/HRAS/AKT1/BRAF	7		GO:0052742	phosphatidylinositol kinase activity	2/43	17/18337	0.000714356	0.00495432	0.00266875	PIK3CA/ATM	2		GO:0001102	RNA polymerase II activating transcription factor binding	2/32	48/18337	0.00316542	0.0192036	0.0113289	RB1/CTNNB1	2		hsa04370	VEGF signaling pathway	3/12	59/8109	7.68337e-05	0.000361119	0.000137492	PIK3CA/KDR/NRAS	3
hsa04919	Thyroid hormone signaling pathway	9/41	121/8109	6.37465e-09	3.55746e-08	1.32039e-08	TP53/CTNNB1/PIK3CA/KRAS/HRAS/ESR1/NRAS/MAP2K1/MTOR	9		hsa05235	PD-L1 expression and PD-1 checkpoint pathway in cancer	7/32	89/8109	4.06984e-08	2.23185e-07	7.8771e-08	KRAS/EGFR/PIK3CA/JAK2/HRAS/AKT1/ALK	7		GO:0019003	GDP binding	3/43	75/18337	0.000721052	0.00495432	0.00266875	KRAS/HRAS/NRAS	3		GO:0005516	calmodulin binding	3/32	198/18337	0.00488425	0.0286753	0.0169166	EGFR/NOS3/AKT1	3		hsa05221	Acute myeloid leukemia	3/12	67/8109	0.000112468	0.000511546	0.000194766	PIK3CA/KIT/NRAS	3
hsa05166	Human T-cell leukemia virus 1 infection	11/41	222/8109	7.75888e-09	4.19464e-08	1.55688e-08	RB1/TP53/CDKN2A/SMAD4/PIK3CA/KRAS/TERT/HRAS/ATM/NRAS/MAP2K1	11		hsa04510	Focal adhesion	9/32	201/8109	5.05675e-08	2.6864e-07	9.4814e-08	ERBB2/EGFR/PIK3CA/HRAS/AKT1/KDR/CTNNB1/BRAF/MET	9		GO:0044389	ubiquitin-like protein ligase binding	5/43	312/18337	0.000782536	0.00520875	0.0028058	EGFR/RB1/TP53/APC/FBXW7	5		GO:0001221	transcription coregulator binding	2/32	61/18337	0.00506341	0.0287981	0.0169891	TERT/SMAD4	2		hsa05167	Kaposi sarcoma-associated herpesvirus infection	4/12	194/8109	0.00013525	0.000595946	0.0002269	TP53/PIK3CA/RB1/NRAS	4
hsa05235	PD-L1 expression and PD-1 checkpoint pathway in cancer	8/41	89/8109	1.08774e-08	5.70239e-08	2.11649e-08	EGFR/PIK3CA/KRAS/HRAS/NRAS/ALK/MAP2K1/MTOR	8		hsa04370	VEGF signaling pathway	6/32	59/8109	8.95044e-08	4.58824e-07	1.61938e-07	KRAS/PIK3CA/HRAS/NOS3/AKT1/KDR	6		GO:0030295	protein kinase activator activity	3/43	84/18337	0.00100266	0.00647172	0.00348613	PIK3CA/STK11/MAP2K1	3		GO:0002039	p53 binding	2/32	66/18337	0.00590287	0.0325552	0.0192055	TP53/STK11	2		hsa01524	Platinum drug resistance	3/12	73/8109	0.000145289	0.00062078	0.000236355	TP53/PIK3CA/CDKN2A	3
hsa04370	VEGF signaling pathway	7/41	59/8109	1.38797e-08	7.0623e-08	2.62124e-08	PIK3CA/KRAS/HRAS/KDR/NRAS/MAP2K1/NOS3	7		hsa04933	AGE-RAGE signaling pathway in diabetic complications	7/32	100/8109	9.17648e-08	4.58824e-07	1.61938e-07	KRAS/PIK3CA/JAK2/HRAS/NOS3/AKT1/SMAD4	7		GO:0008013	beta-catenin binding	3/43	85/18337	0.00103765	0.00650059	0.00350167	CTNNB1/APC/ESR1	3		GO:0019003	GDP binding	2/32	75/18337	0.00756243	0.0404812	0.0238813	KRAS/HRAS	2		hsa05207	Chemical carcinogenesis - receptor activation	4/12	212/8109	0.000190619	0.00079051	0.000300978	EGFR/PIK3CA/RB1/NRAS	4
hsa04915	Estrogen signaling pathway	9/41	138/8109	2.03431e-08	1.00553e-07	3.73213e-08	EGFR/ESR2/PIK3CA/KRAS/HRAS/ESR1/NRAS/MAP2K1/NOS3	9		hsa04218	Cellular senescence	8/32	156/8109	1.11434e-07	5.41251e-07	1.9103e-07	TP53/KRAS/PIK3CA/RB1/CDKN2A/HRAS/ATM/AKT1	8		GO:0051219	phosphoprotein binding	3/43	87/18337	0.00110994	0.00675475	0.00363859	RB1/FBXW7/MTOR	3		GO:0046332	SMAD binding	2/32	77/18337	0.00795667	0.0412392	0.0243285	CTNNB1/SMAD4	2		hsa04810	Regulation of actin cytoskeleton	4/12	218/8109	0.000212277	0.000855173	0.000325598	EGFR/PIK3CA/FGFR2/NRAS	4
hsa05231	Choline metabolism in cancer	8/41	98/8109	2.34542e-08	1.1271e-07	4.18335e-08	EGFR/PIK3CA/KRAS/HRAS/PDGFRA/NRAS/MAP2K1/MTOR	8		hsa05163	Human cytomegalovirus infection	9/32	225/8109	1.33701e-07	6.31367e-07	2.22835e-07	TP53/KRAS/EGFR/PIK3CA/RB1/CDKN2A/HRAS/AKT1/CTNNB1	9		GO:0019209	kinase activator activity	3/43	90/18337	0.00122421	0.00724323	0.00390171	PIK3CA/STK11/MAP2K1	3		GO:0033613	activating transcription factor binding	2/32	78/18337	0.00815721	0.0412392	0.0243285	RB1/CTNNB1	2		hsa04012	ErbB signaling pathway	3/12	85/8109	0.000228423	0.000894656	0.00034063	EGFR/PIK3CA/NRAS	3
hsa04929	GnRH secretion	7/41	64/8109	2.48123e-08	1.16014e-07	4.30598e-08	ESR2/PIK3CA/KRAS/HRAS/NRAS/GNA11/MAP2K1	7		hsa05221	Acute myeloid leukemia	6/32	67/8109	1.93907e-07	8.90925e-07	3.14444e-07	KRAS/PIK3CA/KIT/HRAS/AKT1/BRAF	6		GO:0003707	steroid hormone receptor activity	2/43	26/18337	0.0016844	0.00969666	0.00522331	ESR2/ESR1	2		GO:0050660	flavin adenine dinucleotide binding	2/32	81/18337	0.00877244	0.0431509	0.0254563	NOS3/DPYD	2		hsa04211	Longevity regulating pathway	3/12	89/8109	0.00026176	0.000971266	0.000369799	TP53/PIK3CA/NRAS	3
hsa04550	Signaling pathways regulating pluripotency of stem cells	9/41	143/8109	2.77874e-08	1.26506e-07	4.69539e-08	CTNNB1/SMAD4/PIK3CA/FGFR3/KRAS/APC/HRAS/NRAS/MAP2K1	9		hsa04722	Neurotrophin signaling pathway	7/32	119/8109	3.04941e-07	1.36421e-06	4.81486e-07	TP53/KRAS/PIK3CA/HRAS/NTRK1/AKT1/BRAF	7		GO:0001882	nucleoside binding	5/43	390/18337	0.00210109	0.0117771	0.006344	KRAS/HRAS/NRAS/GNA11/CDA	5		GO:0030295	protein kinase activator activity	2/32	84/18337	0.00940788	0.0449127	0.0264956	PIK3CA/STK11	2		hsa05235	PD-L1 expression and PD-1 checkpoint pathway in cancer	3/12	89/8109	0.00026176	0.000971266	0.000369799	EGFR/PIK3CA/NRAS	3
hsa04072	Phospholipase D signaling pathway	9/41	148/8109	3.75155e-08	1.66415e-07	6.17664e-08	EGFR/PIK3CA/KRAS/HRAS/KIT/PDGFRA/NRAS/MAP2K1/MTOR	9		hsa01524	Platinum drug resistance	6/32	73/8109	3.25327e-07	1.41809e-06	5.00503e-07	TP53/ERBB2/PIK3CA/CDKN2A/ATM/AKT1	6		GO:0097718	disordered domain specific binding	2/43	34/18337	0.00287317	0.0156919	0.00845278	RB1/TP53	2		GO:0008013	beta-catenin binding	2/32	85/18337	0.00962415	0.0449127	0.0264956	APC/CTNNB1	2		hsa05222	Small cell lung cancer	3/12	92/8109	0.000288731	0.00104387	0.000397443	TP53/PIK3CA/RB1	3
hsa04510	Focal adhesion	10/41	201/8109	4.01885e-08	1.73815e-07	6.45131e-08	EGFR/CTNNB1/MET/PIK3CA/ERBB2/HRAS/PDGFRA/KDR/BRAF/MAP2K1	10		hsa05167	Kaposi sarcoma-associated herpesvirus infection	8/32	194/8109	5.97149e-07	2.53788e-06	8.95724e-07	TP53/KRAS/PIK3CA/RB1/JAK2/HRAS/AKT1/CTNNB1	8		GO:0061629	RNA polymerase II-specific DNA-binding transcription factor binding	4/43	271/18337	0.00366147	0.0194973	0.0105026	RB1/CDKN2A/CTNNB1/ESR1	4		GO:0051219	phosphoprotein binding	2/32	87/18337	0.0100633	0.0457881	0.0270121	RB1/FBXW7	2		hsa05231	Choline metabolism in cancer	3/12	98/8109	0.000347945	0.00122651	0.000466979	EGFR/PIK3CA/NRAS	3
hsa04917	Prolactin signaling pathway	7/41	70/8109	4.68326e-08	1.97611e-07	7.3345e-08	ESR2/PIK3CA/KRAS/HRAS/ESR1/NRAS/MAP2K1	7		hsa04210	Apoptosis	7/32	136/8109	7.58511e-07	3.14505e-06	1.11002e-06	TP53/KRAS/PIK3CA/HRAS/ATM/NTRK1/AKT1	7		GO:0004520	endodeoxyribonuclease activity	2/43	40/18337	0.00395936	0.0205694	0.0110801	XRCC1/ERCC1	2		GO:0019209	kinase activator activity	2/32	90/18337	0.0107386	0.0476688	0.0281215	PIK3CA/STK11	2		hsa04071	Sphingolipid signaling pathway	3/12	119/8109	0.000615497	0.00206631	0.000786725	TP53/PIK3CA/NRAS	3
hsa01524	Platinum drug resistance	7/41	73/8109	6.2953e-08	2.59306e-07	9.62439e-08	TP53/CDKN2A/PIK3CA/ERBB2/MSH3/ATM/ERCC1	7		hsa05418	Fluid shear stress and atherosclerosis	7/32	139/8109	8.795e-07	3.55988e-06	1.25643e-06	TP53/PIK3CA/NOS3/AKT1/KDR/CTNNB1/NQO1	7		GO:0030331	estrogen receptor binding	2/43	41/18337	0.00415624	0.0210781	0.0113541	CTNNB1/ESR1	2												hsa04722	Neurotrophin signaling pathway	3/12	119/8109	0.000615497	0.00206631	0.000786725	TP53/PIK3CA/NRAS	3
hsa05207	Chemical carcinogenesis - receptor activation	10/41	212/8109	6.6647e-08	2.68138e-07	9.95219e-08	EGFR/RB1/ESR2/PIK3CA/KRAS/HRAS/ESR1/NRAS/MAP2K1/MTOR	10		hsa04211	Longevity regulating pathway	6/32	89/8109	1.06251e-06	4.20061e-06	1.48257e-06	TP53/KRAS/PIK3CA/HRAS/STK11/AKT1	6		GO:0001102	RNA polymerase II activating transcription factor binding	2/43	48/18337	0.00565833	0.0280285	0.0150981	RB1/CTNNB1	2												hsa04919	Thyroid hormone signaling pathway	3/12	121/8109	0.000646245	0.00211908	0.000806818	TP53/PIK3CA/NRAS	3
hsa05161	Hepatitis B	9/41	162/8109	8.22385e-08	3.23347e-07	1.20013e-07	RB1/TP53/SMAD4/PIK3CA/KRAS/HRAS/BRAF/NRAS/MAP2K1	9		hsa05208	Chemical carcinogenesis - reactive oxygen species	8/32	223/8109	1.71687e-06	6.63338e-06	2.34119e-06	KRAS/EGFR/PIK3CA/HRAS/AKT1/BRAF/NQO1/MET	8		GO:0004879	nuclear receptor activity	2/43	52/18337	0.00661225	0.0310952	0.0167501	ESR2/ESR1	2												hsa04110	Cell cycle	3/12	126/8109	0.000727391	0.00233096	0.000887486	TP53/CDKN2A/RB1	3
hsa04810	Regulation of actin cytoskeleton	10/41	218/8109	8.67688e-08	3.33578e-07	1.23811e-07	EGFR/PIK3CA/FGFR3/KRAS/APC/HRAS/PDGFRA/BRAF/NRAS/MAP2K1	10		hsa04020	Calcium signaling pathway	8/32	240/8109	2.97945e-06	1.12557e-05	3.9726e-06	ERBB2/EGFR/NOS3/NTRK1/RET/KDR/MET/FGFR3	8		GO:0098531	ligand-activated transcription factor activity	2/43	52/18337	0.00661225	0.0310952	0.0167501	ESR2/ESR1	2												hsa04926	Relaxin signaling pathway	3/12	129/8109	0.000779073	0.00244109	0.00092942	EGFR/PIK3CA/NRAS	3
hsa04722	Neurotrophin signaling pathway	8/41	119/8109	1.08259e-07	4.07148e-07	1.51117e-07	TP53/PIK3CA/KRAS/HRAS/NTRK1/BRAF/NRAS/MAP2K1	8		hsa04066	HIF-1 signaling pathway	6/32	109/8109	3.50329e-06	1.29469e-05	4.56951e-06	ERBB2/EGFR/PIK3CA/NOS3/VHL/AKT1	6		GO:0003924	GTPase activity	4/43	322/18337	0.00671981	0.0310952	0.0167501	KRAS/HRAS/NRAS/GNA11	4												hsa04068	FoxO signaling pathway	3/12	131/8109	0.000814801	0.00249754	0.000950912	EGFR/PIK3CA/NRAS	3
hsa04020	Calcium signaling pathway	10/41	240/8109	2.1402e-07	7.87775e-07	2.9239e-07	EGFR/MET/FGFR3/ERBB2/RET/PDGFRA/KDR/NTRK1/GNA11/NOS3	10		hsa04071	Sphingolipid signaling pathway	6/32	119/8109	5.83937e-06	2.11211e-05	7.45452e-06	TP53/KRAS/PIK3CA/HRAS/NOS3/AKT1	6		GO:0051287	NAD binding	2/43	53/18337	0.00686139	0.0310952	0.0167501	IDH2/IDH1	2												hsa04210	Apoptosis	3/12	136/8109	0.000908669	0.00272601	0.0010379	TP53/PIK3CA/NRAS	3
hsa04540	Gap junction	7/41	88/8109	2.32066e-07	8.36404e-07	3.10439e-07	EGFR/KRAS/HRAS/PDGFRA/NRAS/GNA11/MAP2K1	7		hsa04919	Thyroid hormone signaling pathway	6/32	121/8109	6.43169e-06	2.27789e-05	8.03961e-06	TP53/KRAS/PIK3CA/HRAS/AKT1/CTNNB1	6		GO:0045296	cadherin binding	4/43	332/18337	0.00747155	0.033155	0.0178596	EGFR/CTNNB1/KDR/IDH1	4												hsa04915	Estrogen signaling pathway	3/12	138/8109	0.000948067	0.00278495	0.00106034	EGFR/PIK3CA/NRAS	3
hsa04211	Longevity regulating pathway	7/41	89/8109	2.50948e-07	8.85999e-07	3.28847e-07	TP53/PIK3CA/KRAS/HRAS/STK11/NRAS/MTOR	7		hsa04917	Prolactin signaling pathway	5/32	70/8109	6.97003e-06	2.41817e-05	8.53473e-06	KRAS/PIK3CA/JAK2/HRAS/AKT1	5		GO:0097110	scaffold protein binding	2/43	58/18337	0.00816999	0.0348042	0.018748	BRAF/MAP2K1	2												hsa05418	Fluid shear stress and atherosclerosis	3/12	139/8109	0.000968169	0.00278596	0.00106072	TP53/PIK3CA/KDR	3
hsa04210	Apoptosis	8/41	136/8109	3.05291e-07	1.05631e-06	3.92057e-07	TP53/PIK3CA/KRAS/HRAS/NTRK1/ATM/NRAS/MAP2K1	8		hsa04520	Adherens junction	5/32	71/8109	7.47721e-06	2.54225e-05	8.97266e-06	ERBB2/EGFR/CTNNB1/SMAD4/MET	5		GO:1990841	promoter-specific chromatin binding	2/43	58/18337	0.00816999	0.0348042	0.018748	TP53/ERCC1	2												hsa04550	Signaling pathways regulating pluripotency of stem cells	3/12	143/8109	0.0010513	0.00296465	0.00112876	PIK3CA/FGFR2/NRAS	3
hsa05167	Kaposi sarcoma-associated herpesvirus infection	9/41	194/8109	3.85461e-07	1.30754e-06	4.85307e-07	RB1/TP53/CTNNB1/PIK3CA/KRAS/HRAS/NRAS/MAP2K1/MTOR	9		hsa04926	Relaxin signaling pathway	6/32	129/8109	9.31039e-06	3.10346e-05	1.09534e-05	KRAS/EGFR/PIK3CA/HRAS/NOS3/AKT1	6		GO:0004536	deoxyribonuclease activity	2/43	59/18337	0.00844415	0.0352668	0.0189972	XRCC1/ERCC1	2												hsa05216	Thyroid cancer	2/12	37/8109	0.00129917	0.00359181	0.00136754	TP53/NRAS	2
hsa04730	Long-term depression	6/41	60/8109	4.67375e-07	1.55492e-06	5.77122e-07	KRAS/HRAS/BRAF/NRAS/GNA11/MAP2K1	6		hsa04915	Estrogen signaling pathway	6/32	138/8109	1.3717e-05	4.48442e-05	1.58274e-05	KRAS/EGFR/PIK3CA/HRAS/NOS3/AKT1	6		GO:0002039	p53 binding	2/43	66/18337	0.010477	0.0421058	0.0226812	TP53/STK11	2												hsa04934	Cushing syndrome	3/12	155/8109	0.00132757	0.00359975	0.00137057	EGFR/CDKN2A/RB1	3
hsa04150	mTOR signaling pathway	8/41	155/8109	8.32177e-07	2.66605e-06	9.89529e-07	PIK3CA/KRAS/HRAS/STK11/BRAF/NRAS/MAP2K1/MTOR	8		hsa05207	Chemical carcinogenesis - receptor activation	7/32	212/8109	1.45891e-05	4.67954e-05	1.6516e-05	KRAS/EGFR/PIK3CA/RB1/JAK2/HRAS/AKT1	7		GO:0003684	damaged DNA binding	2/43	66/18337	0.010477	0.0421058	0.0226812	XRCC1/ERCC1	2												hsa04510	Focal adhesion	3/12	201/8109	0.00279788	0.00740949	0.00282108	EGFR/PIK3CA/KDR	3
hsa04934	Cushing syndrome	8/41	155/8109	8.32177e-07	2.66605e-06	9.89529e-07	EGFR/RB1/CDKN2A/CTNNB1/APC/BRAF/GNA11/MAP2K1	8		hsa05417	Lipid and atherosclerosis	7/32	215/8109	1.59879e-05	5.03323e-05	1.77643e-05	TP53/KRAS/PIK3CA/JAK2/HRAS/NOS3/AKT1	7		GO:0005516	calmodulin binding	3/43	198/18337	0.0111448	0.0439601	0.02368	EGFR/OBSCN/NOS3	3												hsa05169	Epstein-Barr virus infection	3/12	202/8109	0.00283768	0.00740949	0.00282108	TP53/PIK3CA/RB1	3
hsa04066	HIF-1 signaling pathway	7/41	109/8109	1.00791e-06	3.17032e-06	1.17669e-06	VHL/EGFR/PIK3CA/ERBB2/MAP2K1/MTOR/NOS3	7		hsa04810	Regulation of actin cytoskeleton	7/32	218/8109	1.74962e-05	5.40792e-05	1.90868e-05	KRAS/EGFR/PIK3CA/APC/HRAS/BRAF/FGFR3	7		GO:0005525	GTP binding	4/43	376/18337	0.0114382	0.0442971	0.0238615	KRAS/HRAS/NRAS/GNA11	4												hsa05417	Lipid and atherosclerosis	3/12	215/8109	0.00338746	0.00868421	0.00330642	TP53/PIK3CA/NRAS	3
hsa05208	Chemical carcinogenesis - reactive oxygen species	9/41	223/8109	1.24669e-06	3.85139e-06	1.42948e-06	EGFR/MET/PIK3CA/KRAS/HRAS/BRAF/NRAS/MAP2K1/NQO1	9		hsa04072	Phospholipase D signaling pathway	6/32	148/8109	2.04546e-05	6.20944e-05	2.19157e-05	KRAS/EGFR/PIK3CA/KIT/HRAS/AKT1	6		GO:0032550	purine ribonucleoside binding	4/43	381/18337	0.0119604	0.0443364	0.0238827	KRAS/HRAS/NRAS/GNA11	4												hsa04213	Longevity regulating pathway - multiple species	2/12	62/8109	0.00361372	0.00909883	0.00346428	PIK3CA/NRAS	2
hsa04071	Sphingolipid signaling pathway	7/41	119/8109	1.82606e-06	5.4467e-06	2.02159e-06	TP53/PIK3CA/KRAS/HRAS/NRAS/MAP2K1/NOS3	7		hsa04150	mTOR signaling pathway	6/32	155/8109	2.65961e-05	7.79541e-05	2.75132e-05	KRAS/PIK3CA/HRAS/STK11/AKT1/BRAF	6		GO:0140097	catalytic activity, acting on DNA	3/43	204/18337	0.0120769	0.0443364	0.0238827	TERT/XRCC1/ERCC1	3												hsa05208	Chemical carcinogenesis - reactive oxygen species	3/12	223/8109	0.0037564	0.00929216	0.00353789	EGFR/PIK3CA/NRAS	3
hsa04935	Growth hormone synthesis, secretion and action	7/41	119/8109	1.82606e-06	5.4467e-06	2.02159e-06	PIK3CA/KRAS/HRAS/NRAS/GNA11/MAP2K1/MTOR	7		hsa04934	Cushing syndrome	6/32	155/8109	2.65961e-05	7.79541e-05	2.75132e-05	EGFR/RB1/APC/CDKN2A/CTNNB1/BRAF	6		GO:0001883	purine nucleoside binding	4/43	384/18337	0.012281	0.0443364	0.0238827	KRAS/HRAS/NRAS/GNA11	4												hsa04929	GnRH secretion	2/12	64/8109	0.00384627	0.00935041	0.00356007	PIK3CA/NRAS	2
hsa04926	Relaxin signaling pathway	7/41	129/8109	3.13983e-06	9.20662e-06	3.41712e-06	EGFR/PIK3CA/KRAS/HRAS/NRAS/MAP2K1/NOS3	7		hsa05231	Choline metabolism in cancer	5/32	98/8109	3.61751e-05	0.000104233	3.67882e-05	KRAS/EGFR/PIK3CA/HRAS/AKT1	5		GO:0032549	ribonucleoside binding	4/43	384/18337	0.012281	0.0443364	0.0238827	KRAS/HRAS/NRAS/GNA11	4												hsa04664	Fc epsilon RI signaling pathway	2/12	68/8109	0.00433186	0.0103524	0.00394157	PIK3CA/NRAS	2
hsa04910	Insulin signaling pathway	7/41	137/8109	4.69064e-06	1.35247e-05	5.0198e-06	PIK3CA/KRAS/HRAS/BRAF/NRAS/MAP2K1/MTOR	7		hsa04725	Cholinergic synapse	5/32	113/8109	7.17091e-05	0.000203176	7.17091e-05	KRAS/PIK3CA/JAK2/HRAS/AKT1	5		GO:0019001	guanyl nucleotide binding	4/43	398/18337	0.0138503	0.0468356	0.025229	KRAS/HRAS/NRAS/GNA11	4												hsa05211	Renal cell carcinoma	2/12	69/8109	0.00445751	0.0104751	0.0039883	PIK3CA/NRAS	2
hsa04371	Apelin signaling pathway	7/41	139/8109	5.16494e-06	1.46481e-05	5.43678e-06	SMAD4/KRAS/HRAS/NRAS/MAP2K1/MTOR/NOS3	7		hsa04062	Chemokine signaling pathway	6/32	192/8109	8.83709e-05	0.000246279	8.69222e-05	KRAS/PIK3CA/JAK2/HRAS/AKT1/BRAF	6		GO:0032561	guanyl ribonucleotide binding	4/43	398/18337	0.0138503	0.0468356	0.025229	KRAS/HRAS/NRAS/GNA11	4												hsa04917	Prolactin signaling pathway	2/12	70/8109	0.00458484	0.0105082	0.00400088	PIK3CA/NRAS	2
hsa04140	Autophagy - animal	7/41	141/8109	5.67859e-06	1.58451e-05	5.88105e-06	PIK3CA/KRAS/HRAS/STK11/NRAS/MAP2K1/MTOR	7		hsa04935	Growth hormone synthesis, secretion and action	5/32	119/8109	9.17579e-05	0.000251594	8.8798e-05	KRAS/PIK3CA/JAK2/HRAS/AKT1	5		GO:0035258	steroid hormone receptor binding	2/43	77/18337	0.0140615	0.0468356	0.025229	CTNNB1/ESR1	2												hsa04020	Calcium signaling pathway	3/12	240/8109	0.00462062	0.0105082	0.00400088	EGFR/KDR/FGFR2	3
hsa04912	GnRH signaling pathway	6/41	93/8109	6.29467e-06	1.72854e-05	6.41562e-06	EGFR/KRAS/HRAS/NRAS/GNA11/MAP2K1	6		hsa04213	Longevity regulating pathway - multiple species	4/32	62/8109	9.49104e-05	0.000256108	9.03909e-05	KRAS/PIK3CA/HRAS/AKT1	4		GO:0046332	SMAD binding	2/43	77/18337	0.0140615	0.0468356	0.025229	CTNNB1/SMAD4	2												hsa04137	Mitophagy - animal	2/12	72/8109	0.00484455	0.0108426	0.00412819	TP53/NRAS	2
hsa05170	Human immunodeficiency virus 1 infection	8/41	212/8109	8.69288e-06	2.34979e-05	8.72148e-06	PIK3CA/KRAS/HRAS/ATM/NRAS/GNA11/MAP2K1/MTOR	8		hsa04929	GnRH secretion	4/32	64/8109	0.000107505	0.000285561	0.000100786	KRAS/PIK3CA/HRAS/AKT1	4		GO:0000287	magnesium ion binding	3/43	216/18337	0.0140727	0.0468356	0.025229	IDH2/STK11/IDH1	3												hsa04115	p53 signaling pathway	2/12	73/8109	0.00497693	0.0108658	0.00413703	TP53/CDKN2A	2
hsa04933	AGE-RAGE signaling pathway in diabetic complications	6/41	100/8109	9.59112e-06	2.55271e-05	9.47463e-06	SMAD4/PIK3CA/KRAS/HRAS/NRAS/NOS3	6		hsa04110	Cell cycle	5/32	126/8109	0.000120328	0.000314703	0.000111072	TP53/RB1/CDKN2A/ATM/SMAD4	5		GO:0033613	activating transcription factor binding	2/43	78/18337	0.0144103	0.0472213	0.0254367	RB1/CTNNB1	2												hsa05131	Shigellosis	3/12	247/8109	0.00500905	0.0108658	0.00413703	EGFR/TP53/PIK3CA	3
hsa04916	Melanogenesis	6/41	101/8109	1.0159e-05	2.6629e-05	9.88358e-06	CTNNB1/KRAS/HRAS/KIT/NRAS/MAP2K1	6		hsa05203	Viral carcinogenesis	6/32	204/8109	0.000123548	0.000318229	0.000112316	TP53/KRAS/PIK3CA/RB1/CDKN2A/HRAS	6		GO:0050660	flavin adenine dinucleotide binding	2/43	81/18337	0.0154789	0.0499546	0.0269091	DPYD/NOS3	2												hsa04662	B cell receptor signaling pathway	2/12	82/8109	0.00624298	0.0133373	0.00507803	PIK3CA/NRAS	2
hsa04213	Longevity regulating pathway - multiple species	5/41	62/8109	1.34512e-05	3.47323e-05	1.28912e-05	PIK3CA/KRAS/HRAS/NRAS/MTOR	5		hsa04664	Fc epsilon RI signaling pathway	4/32	68/8109	0.000136278	0.00034578	0.00012204	KRAS/PIK3CA/HRAS/AKT1	4																						hsa04540	Gap junction	2/12	88/8109	0.00716067	0.0150695	0.00573754	EGFR/NRAS	2
hsa04725	Cholinergic synapse	6/41	113/8109	1.9369e-05	4.92769e-05	1.82896e-05	PIK3CA/KRAS/HRAS/NRAS/GNA11/MAP2K1	6		hsa04910	Insulin signaling pathway	5/32	137/8109	0.000178497	0.000446241	0.000157497	KRAS/PIK3CA/HRAS/AKT1/BRAF	5																						hsa04912	GnRH signaling pathway	2/12	93/8109	0.00796963	0.0165253	0.00629181	EGFR/NRAS	2
hsa04720	Long-term potentiation	5/41	67/8109	1.97065e-05	4.94091e-05	1.83387e-05	KRAS/HRAS/BRAF/NRAS/MAP2K1	5		hsa04371	Apelin signaling pathway	5/32	139/8109	0.000191049	0.000470701	0.00016613	KRAS/HRAS/NOS3/AKT1/SMAD4	5																						hsa04933	AGE-RAGE signaling pathway in diabetic complications	2/12	100/8109	0.00916863	0.0187359	0.00713349	PIK3CA/NRAS	2
hsa04664	Fc epsilon RI signaling pathway	5/41	68/8109	2.11918e-05	5.23741e-05	1.94391e-05	PIK3CA/KRAS/HRAS/NRAS/MAP2K1	5		hsa04140	Autophagy - animal	5/32	141/8109	0.000204267	0.000496077	0.000175086	KRAS/PIK3CA/HRAS/STK11/AKT1	5																						hsa04916	Melanogenesis	2/12	101/8109	0.00934617	0.0188259	0.00716774	KIT/NRAS	2
hsa04520	Adherens junction	5/41	71/8109	2.61762e-05	6.37813e-05	2.3673e-05	EGFR/CTNNB1/MET/SMAD4/ERBB2	5		hsa04662	B cell receptor signaling pathway	4/32	82/8109	0.000281574	0.000674192	0.00023795	KRAS/PIK3CA/HRAS/AKT1	4																						hsa04625	C-type lectin receptor signaling pathway	2/12	104/8109	0.00988809	0.0193642	0.0073727	PIK3CA/NRAS	2
hsa04650	Natural killer cell mediated cytotoxicity	6/41	131/8109	4.48074e-05	0.000107662	3.99598e-05	PIK3CA/KRAS/HRAS/BRAF/NRAS/MAP2K1	6		hsa04630	JAK-STAT signaling pathway	5/32	162/8109	0.000389329	0.000919249	0.000324441	EGFR/PIK3CA/JAK2/HRAS/AKT1	5																						hsa04660	T cell receptor signaling pathway	2/12	104/8109	0.00988809	0.0193642	0.0073727	PIK3CA/NRAS	2
hsa04662	B cell receptor signaling pathway	5/41	82/8109	5.26642e-05	0.000124807	4.63232e-05	PIK3CA/KRAS/HRAS/NRAS/MAP2K1	5		hsa05222	Small cell lung cancer	4/32	92/8109	0.000437559	0.00101897	0.000359638	TP53/PIK3CA/RB1/AKT1	4																						hsa04066	HIF-1 signaling pathway	2/12	109/8109	0.010822	0.0209028	0.00795851	EGFR/PIK3CA	2
hsa05418	Fluid shear stress and atherosclerosis	6/41	139/8109	6.24919e-05	0.000144272	5.35479e-05	TP53/CTNNB1/PIK3CA/KDR/NOS3/NQO1	6		hsa05010	Alzheimer disease	7/32	384/8109	0.00060803	0.00139683	0.000492997	KRAS/PIK3CA/APC/HRAS/AKT1/CTNNB1/BRAF	7																						hsa04725	Cholinergic synapse	2/12	113/8109	0.0115965	0.0220961	0.00841283	PIK3CA/NRAS	2
hsa05203	Viral carcinogenesis	7/41	204/8109	6.25457e-05	0.000144272	5.35479e-05	RB1/TP53/CDKN2A/PIK3CA/KRAS/HRAS/NRAS	7		hsa04916	Melanogenesis	4/32	101/8109	0.000623674	0.00141366	0.00049894	KRAS/KIT/HRAS/CTNNB1	4																						hsa04935	Growth hormone synthesis, secretion and action	2/12	119/8109	0.0128032	0.0240701	0.00916441	PIK3CA/NRAS	2
hsa05010	Alzheimer disease	9/41	384/8109	9.89876e-05	0.000225327	8.36322e-05	CTNNB1/PIK3CA/KRAS/APC/HRAS/BRAF/NRAS/MAP2K1/MTOR	9		hsa04914	Progesterone-mediated oocyte maturation	4/32	102/8109	0.00064734	0.001448	0.000511058	KRAS/PIK3CA/AKT1/BRAF	4																						hsa04650	Natural killer cell mediated cytotoxicity	2/12	131/8109	0.0153753	0.0285253	0.0108607	PIK3CA/NRAS	2
hsa04921	Oxytocin signaling pathway	6/41	154/8109	0.000110483	0.000248227	9.21317e-05	EGFR/KRAS/HRAS/NRAS/MAP2K1/NOS3	6		hsa04625	C-type lectin receptor signaling pathway	4/32	104/8109	0.000696575	0.00151818	0.000535827	KRAS/PIK3CA/HRAS/AKT1	4																						hsa04910	Insulin signaling pathway	2/12	137/8109	0.016739	0.0306519	0.0116704	PIK3CA/NRAS	2
hsa04660	T cell receptor signaling pathway	5/41	104/8109	0.000163599	0.000362853	0.000134676	PIK3CA/KRAS/HRAS/NRAS/MAP2K1	5		hsa04660	T cell receptor signaling pathway	4/32	104/8109	0.000696575	0.00151818	0.000535827	KRAS/PIK3CA/HRAS/AKT1	4																						hsa05162	Measles	2/12	139/8109	0.0172048	0.031101	0.0118414	TP53/PIK3CA	2
hsa04726	Serotonergic synapse	5/41	115/8109	0.000262122	0.000574015	0.000213051	KRAS/HRAS/BRAF/NRAS/MAP2K1	5		hsa05170	Human immunodeficiency virus 1 infection	5/32	212/8109	0.00131904	0.00283845	0.00100181	KRAS/PIK3CA/HRAS/ATM/AKT1	5																						hsa04140	Autophagy - animal	2/12	141/8109	0.0176763	0.0315488	0.0120119	PIK3CA/NRAS	2
hsa05217	Basal cell carcinoma	4/41	63/8109	0.000270111	0.000584115	0.0002168	TP53/CTNNB1/APC/SMO	4		hsa00240	Pyrimidine metabolism	3/32	58/8109	0.00148662	0.00315906	0.00111496	CDA/DPYD/CMPK1	3																						hsa04921	Oxytocin signaling pathway	2/12	154/8109	0.0208747	0.0367822	0.0140044	EGFR/NRAS	2
hsa04360	Axon guidance	6/41	182/8109	0.000275405	0.000588211	0.00021832	MET/PIK3CA/KRAS/SMO/HRAS/NRAS	6		hsa04730	Long-term depression	3/32	60/8109	0.0016399	0.00341541	0.00120544	KRAS/HRAS/BRAF	3																						hsa04150	mTOR signaling pathway	2/12	155/8109	0.0211302	0.0367822	0.0140044	PIK3CA/NRAS	2
hsa04062	Chemokine signaling pathway	6/41	192/8109	0.000367347	0.000775012	0.000287653	PIK3CA/KRAS/HRAS/BRAF/NRAS/MAP2K1	6		hsa04650	Natural killer cell mediated cytotoxicity	4/32	131/8109	0.00164743	0.00341541	0.00120544	KRAS/PIK3CA/HRAS/BRAF	4																						hsa04630	JAK-STAT signaling pathway	2/12	162/8109	0.022956	0.0394732	0.015029	EGFR/PIK3CA	2
hsa04110	Cell cycle	5/41	126/8109	0.000400449	0.00083467	0.000309795	RB1/TP53/CDKN2A/SMAD4/ATM	5		hsa05217	Basal cell carcinoma	3/32	63/8109	0.00188784	0.00386666	0.0013647	TP53/APC/CTNNB1	3																						hsa04360	Axon guidance	2/12	182/8109	0.0285218	0.0484527	0.0184479	PIK3CA/NRAS	2
hsa04137	Mitophagy - animal	4/41	72/8109	0.000451457	0.000929787	0.000345099	TP53/KRAS/HRAS/NRAS	4		hsa04720	Long-term potentiation	3/32	67/8109	0.00225316	0.00455997	0.0016094	KRAS/HRAS/BRAF	3																						hsa00670	One carbon pool by folate	1/12	20/8109	0.0292181	0.0490447	0.0186732	MTHFR	1
hsa05417	Lipid and atherosclerosis	6/41	215/8109	0.000670473	0.00136461	0.000506487	TP53/PIK3CA/KRAS/HRAS/NRAS/NOS3	6		hsa04920	Adipocytokine signaling pathway	3/32	69/8109	0.00245116	0.00490232	0.00173023	JAK2/STK11/AKT1	3
hsa04630	JAK-STAT signaling pathway	5/41	162/8109	0.00125367	0.00252191	0.000936029	EGFR/PIK3CA/HRAS/PDGFRA/MTOR	5		hsa05131	Shigellosis	5/32	247/8109	0.00258567	0.00511121	0.00180396	TP53/EGFR/PIK3CA/ATM/AKT1	5
hsa04914	Progesterone-mediated oocyte maturation	4/41	102/8109	0.00167183	0.00332445	0.0012339	PIK3CA/KRAS/BRAF/MAP2K1	4		hsa04137	Mitophagy - animal	3/32	72/8109	0.00276788	0.00540851	0.00190889	TP53/KRAS/HRAS	3
hsa04625	C-type lectin receptor signaling pathway	4/41	104/8109	0.00179584	0.00353047	0.00131037	PIK3CA/KRAS/HRAS/NRAS	4		hsa04115	p53 signaling pathway	3/32	73/8109	0.00287881	0.00556134	0.00196282	TP53/CDKN2A/ATM	3
hsa04928	Parathyroid hormone synthesis, secretion and action	4/41	106/8109	0.00192612	0.00374403	0.00138963	EGFR/BRAF/GNA11/MAP2K1	4		hsa04921	Oxytocin signaling pathway	4/32	154/8109	0.00297345	0.00567962	0.00200457	KRAS/EGFR/HRAS/NOS3	4
hsa05022	Pathways of neurodegeneration - multiple diseases	8/41	476/8109	0.00227778	0.00437839	0.00162508	CTNNB1/KRAS/APC/HRAS/BRAF/NRAS/MAP2K1/MTOR	8		hsa05100	Bacterial invasion of epithelial cells	3/32	77/8109	0.00334986	0.00632751	0.00223324	PIK3CA/CTNNB1/MET	3
hsa05034	Alcoholism	5/41	187/8109	0.00236194	0.00449028	0.00166661	KRAS/HRAS/BRAF/NRAS/MAP2K1	5		hsa00983	Drug metabolism - other enzymes	3/32	80/8109	0.00373246	0.00697272	0.00246096	CDA/DPYD/CMPK1	3
hsa01210	2-Oxocarboxylic acid metabolism	2/41	19/8109	0.00403926	0.00759557	0.00281916	IDH2/IDH1	2		hsa04310	Wnt signaling pathway	4/32	167/8109	0.0039793	0.00735306	0.0025952	TP53/APC/CTNNB1/SMAD4	4
hsa04115	p53 signaling pathway	3/41	73/8109	0.00583962	0.010863	0.00403188	TP53/CDKN2A/ATM	3		hsa04540	Gap junction	3/32	88/8109	0.00487994	0.00892033	0.00314835	KRAS/EGFR/HRAS	3
hsa05100	Bacterial invasion of epithelial cells	3/41	77/8109	0.00677302	0.0124652	0.00462659	CTNNB1/MET/PIK3CA	3		hsa04360	Axon guidance	4/32	182/8109	0.00540219	0.00976992	0.00344821	KRAS/PIK3CA/HRAS/MET	4
hsa05131	Shigellosis	5/41	247/8109	0.00770743	0.0140356	0.00520946	EGFR/TP53/PIK3CA/ATM/MTOR	5		hsa04912	GnRH signaling pathway	3/32	93/8109	0.00569426	0.0101897	0.00359637	KRAS/EGFR/HRAS	3
hsa04310	Wnt signaling pathway	4/41	167/8109	0.00971279	0.0175033	0.00649649	TP53/CTNNB1/SMAD4/APC	4		hsa05202	Transcriptional misregulation in cancer	4/32	192/8109	0.00652043	0.0115466	0.00407527	TP53/ATM/NTRK1/MET	4
hsa00020	Citrate cycle (TCA cycle)	2/41	30/8109	0.00992101	0.0176942	0.00656735	IDH2/IDH1	2		hsa05169	Epstein-Barr virus infection	4/32	202/8109	0.00778381	0.0136417	0.00481473	TP53/PIK3CA/RB1/AKT1	4
hsa05222	Small cell lung cancer	3/41	92/8109	0.0110362	0.0194823	0.00723103	RB1/TP53/PIK3CA	3		hsa04931	Insulin resistance	3/32	108/8109	0.00860771	0.0149317	0.00527002	PIK3CA/NOS3/AKT1	3
hsa04960	Aldosterone-regulated sodium reabsorption	2/41	37/8109	0.0148549	0.0259586	0.00963479	PIK3CA/KRAS	2		hsa04960	Aldosterone-regulated sodium reabsorption	2/32	37/8109	0.00921934	0.0158312	0.00558748	KRAS/PIK3CA	2
hsa05202	Transcriptional misregulation in cancer	4/41	192/8109	0.0155769	0.026948	0.010002	TP53/MET/NTRK1/ATM	4		hsa04726	Serotonergic synapse	3/32	115/8109	0.010218	0.0173706	0.00613081	KRAS/HRAS/BRAF	3
hsa04931	Insulin resistance	3/41	108/8109	0.0169724	0.0290715	0.0107902	PIK3CA/MTOR/NOS3	3		hsa04152	AMPK signaling pathway	3/32	120/8109	0.0114689	0.0193041	0.00681322	PIK3CA/STK11/AKT1	3
hsa04152	AMPK signaling pathway	3/41	120/8109	0.0223972	0.0376831	0.0139864	PIK3CA/STK11/MTOR	3		hsa04611	Platelet activation	3/32	124/8109	0.0125309	0.0208848	0.00737111	PIK3CA/NOS3/AKT1	3
hsa04930	Type II diabetes mellitus	2/41	46/8109	0.0224356	0.0376831	0.0139864	PIK3CA/MTOR	2		hsa04973	Carbohydrate digestion and absorption	2/32	47/8109	0.0146022	0.0241007	0.00850613	PIK3CA/AKT1	2
hsa04714	Thermogenesis	4/41	232/8109	0.0289041	0.0480809	0.0178457	KRAS/HRAS/NRAS/MTOR	4		hsa05132	Salmonella infection	4/32	249/8109	0.0158808	0.0259591	0.00916202	PIK3CA/HRAS/AKT1/CTNNB1	4
hsa04270	Vascular smooth muscle contraction	3/41	134/8109	0.0297926	0.0490868	0.018219	BRAF/GNA11/MAP2K1	3		hsa05162	Measles	3/32	139/8109	0.0170064	0.0275342	0.00971797	TP53/PIK3CA/AKT1	3
										hsa04923	Regulation of lipolysis in adipocytes	2/32	56/8109	0.02035	0.0326368	0.0115189	PIK3CA/AKT1	2
										hsa04390	Hippo signaling pathway	3/32	157/8109	0.0234227	0.0372136	0.0131342	APC/CTNNB1/SMAD4	3
										hsa05164	Influenza A	3/32	171/8109	0.0292096	0.0459781	0.0162276	PIK3CA/JAK2/AKT1	3
										hsa05120	Epithelial cell signaling in Helicobacter pylori infection	2/32	70/8109	0.0308423	0.0481027	0.0169774	EGFR/MET	2
[truncated: 27 more columns]
