# Supplementary material for: The Landscape of Actionable Genomic Alterations by Next-Generation Sequencing in Tumor Tissue Versus Circulating Tumor DNA in Chinese Patients With Non-Small Cell Lung Cancer
Source: Front Oncol. 2022 Feb 22;11:751106. doi: 10.3389/fonc.2021.751106 (PMC8902245; doi:10.3389/fonc.2021.751106)
Supplement: Supplementary file 9 [file Table_7.xlsx]

## Sheet: Sheet1
Supplementary Table7 The highest level of actionable alterations in NSCLC (n=191).				Supplementary Table7 The highest level of actionable alterations in LUAD (n=177).				Supplementary Table7 The highest level of actionable alterations in LUSC (n=14).				Supplementary Table7 Distribution of actionable alterations in NSCLC (n=191).					Supplementary Table7 Distribution of actionable alterations in LUAD (n=177).					Supplementary Table7 Distribution of actionable alterations in LUSC (n=14).					Supplementary Table7 Distribution of alteration types in NSCLC (n=191).				Supplementary Table7 Distribution of alteration types in LUAD (n=177).				Supplementary Table7 Distribution of alteration types in LUSC (n=14).
Var1	Freq	ratio		Var1	Freq	ratio		Var1	Freq	ratio		HIGHEST_DRUG	HIGHEST_LEVEL	merge_3_cols	count		HIGHEST_DRUG	HIGHEST_LEVEL	merge_3_cols	count		HIGHEST_DRUG	HIGHEST_LEVEL	merge_3_cols	count		Hugo_Symbol	Variant_Classification	Count		Hugo_Symbol	Variant_Classification	Count		Hugo_Symbol	Variant_Classification	Count
LEVEL_1	343	0.792148		LEVEL_1	321	0.800499		LEVEL_1	22	0.6875		Afatinib	LEVEL_1	EGFR:Missense_Mutation:p.G452A|EGFR:Missense_Mutation:p.G452A|EGFR:Missense_Mutation:p.L594Q|EGFR:Missense_Mutation:p.L594Q|EGFR:Missense_Mutation:p.G452A|EGFR:Missense_Mutation:p.G452A|EGFR:Missense_Mutation:p.G452A|EGFR:Missense_Mutation:p.G452A|EGFR:Missense_Mutation:p.G452C|EGFR:Missense_Mutation:p.G452C|EGFR:Missense_Mutation:p.S501I|EGFR:Missense_Mutation:p.S501I|EGFR:Missense_Mutation:p.L5…	30		Afatinib	LEVEL_1	EGFR:Missense_Mutation:p.G452A|EGFR:Missense_Mutation:p.G452A|EGFR:Missense_Mutation:p.L594Q|EGFR:Missense_Mutation:p.L594Q|EGFR:Missense_Mutation:p.G452A|EGFR:Missense_Mutation:p.G452A|EGFR:Missense_Mutation:p.G452C|EGFR:Missense_Mutation:p.G452C|EGFR:Missense_Mutation:p.S501I|EGFR:Missense_Mutation:p.S501I|EGFR:Missense_Mutation:p.L594Q|EGFR:Missense_Mutation:p.L594Q|EGFR:Missense_Mutation:p.G4…	28		Afatinib	LEVEL_1	EGFR:Missense_Mutation:p.G452A|EGFR:Missense_Mutation:p.G452A	2		EGFR	In_Frame_Del	65		EGFR	In_Frame_Del	63		EGFR	In_Frame_Del	2
LEVEL_2	70	0.161663		LEVEL_2	63	0.157107		LEVEL_2	7	0.21875		Alpelisib+Fulvestrant	LEVEL_1	PIK3CA:Missense_Mutation:p.E545K|PIK3CA:Missense_Mutation:p.E542K|PIK3CA:Missense_Mutation:p.C420R|PIK3CA:Missense_Mutation:p.E545K|PIK3CA:Missense_Mutation:p.C420R|PIK3CA:Missense_Mutation:p.E545K|PIK3CA:Missense_Mutation:p.H1047R|PIK3CA:Missense_Mutation:p.E545K|PIK3CA:Missense_Mutation:p.H1047R|PIK3CA:Missense_Mutation:p.E545K|PIK3CA:Missense_Mutation:p.E545K|PIK3CA:Missense_Mutation:p.E545K|P…	17		Alpelisib+Fulvestrant	LEVEL_1	PIK3CA:Missense_Mutation:p.C420R|PIK3CA:Missense_Mutation:p.E545K|PIK3CA:Missense_Mutation:p.C420R|PIK3CA:Missense_Mutation:p.H1047R|PIK3CA:Missense_Mutation:p.E545K|PIK3CA:Missense_Mutation:p.H1047R|PIK3CA:Missense_Mutation:p.E545K|PIK3CA:Missense_Mutation:p.E545K|PIK3CA:Missense_Mutation:p.E542K|PIK3CA:Missense_Mutation:p.H1047R|PIK3CA:Missense_Mutation:p.E542K|PIK3CA:Missense_Mutation:p.E545K|…	13		Alpelisib+Fulvestrant	LEVEL_1	PIK3CA:Missense_Mutation:p.E545K|PIK3CA:Missense_Mutation:p.E542K|PIK3CA:Missense_Mutation:p.E545K|PIK3CA:Missense_Mutation:p.E545K	4		ERBB2	In_Frame_Del	1		ERBB2	In_Frame_Del	1		EGFR	Missense_Mutation	9
LEVEL_3A	7	0.0161663		LEVEL_3A	7	0.0174564		LEVEL_4	3	0.09375		Amivantamab,Mobocertinib	LEVEL_1	EGFR:In_Frame_Ins:p.A500delinsASVD|EGFR:In_Frame_Ins:p.A500delinsASVD|EGFR:In_Frame_Ins:p.P505delinsPHG|EGFR:In_Frame_Ins:p.P505delinsPHG|EGFR:In_Frame_Ins:p.P505delinsPH|EGFR:In_Frame_Ins:p.P505delinsPH|EGFR:In_Frame_Ins:p.N504delinsNPHVC|EGFR:In_Frame_Ins:p.N504delinsNPHVC|EGFR:In_Frame_Ins:p.D503delinsDNGP|EGFR:In_Frame_Ins:p.D503delinsDNGP|EGFR:In_Frame_Ins:p.H506delinsPNPY|EGFR:In_Frame_Ins:…	16		Amivantamab,Mobocertinib	LEVEL_1	EGFR:In_Frame_Ins:p.A500delinsASVD|EGFR:In_Frame_Ins:p.A500delinsASVD|EGFR:In_Frame_Ins:p.P505delinsPHG|EGFR:In_Frame_Ins:p.P505delinsPHG|EGFR:In_Frame_Ins:p.P505delinsPH|EGFR:In_Frame_Ins:p.P505delinsPH|EGFR:In_Frame_Ins:p.N504delinsNPHVC|EGFR:In_Frame_Ins:p.N504delinsNPHVC|EGFR:In_Frame_Ins:p.D503delinsDNGP|EGFR:In_Frame_Ins:p.D503delinsDNGP|EGFR:In_Frame_Ins:p.H506delinsPNPY|EGFR:In_Frame_Ins:…	16		Erlotinib,Erlotinib+Ramucirumab	LEVEL_1	EGFR:In_Frame_Del:p.478_483del|EGFR:In_Frame_Del:p.478_483del|EGFR:Missense_Mutation:p.L591R|EGFR:Missense_Mutation:p.L591R|EGFR:Missense_Mutation:p.L591R|EGFR:Missense_Mutation:p.L591R|EGFR:Missense_Mutation:p.L591R|EGFR:Missense_Mutation:p.L591R|EGFR:Missense_Mutation:p.L591R|EGFR:Missense_Mutation:p.L591R|EGFR:In_Frame_Del:p.480_486del|EGFR:In_Frame_Del:p.480_486del	12		EGFR	In_Frame_Ins	9		EGFR	In_Frame_Ins	9		IDH1	Missense_Mutation	1
LEVEL_4	13	0.0300231		LEVEL_4	10	0.0249377		Total	32			Dabrafenib,Dabrafenib+Trametinib	LEVEL_1	BRAF:Missense_Mutation:p.V600E|BRAF:Missense_Mutation:p.V600E|BRAF:Missense_Mutation:p.V600E	3		Dabrafenib,Dabrafenib+Trametinib	LEVEL_1	BRAF:Missense_Mutation:p.V600E|BRAF:Missense_Mutation:p.V600E|BRAF:Missense_Mutation:p.V600E	3		Osimertinib	LEVEL_1	EGFR:Missense_Mutation:p.T523M|EGFR:Missense_Mutation:p.T523M|EGFR:Missense_Mutation:p.T523M|EGFR:Missense_Mutation:p.T523M	4		ERBB2	In_Frame_Ins	10		ERBB2	In_Frame_Ins	10		KRAS	Missense_Mutation	1
Total	433			Total	401							Enasidenib	LEVEL_1	IDH2:Missense_Mutation:p.R10Q	1		Enasidenib	LEVEL_1	IDH2:Missense_Mutation:p.R10Q	1		Alpelisib+Fulvestrant	LEVEL_2	PIK3CA:Missense_Mutation:p.M1043I|PIK3CA:Missense_Mutation:p.M1043V|PIK3CA:Missense_Mutation:p.Q546H|PIK3CA:Missense_Mutation:p.C378R	4		AKT1	Missense_Mutation	1		AKT1	Missense_Mutation	1		NRAS	Missense_Mutation	1
												Erlotinib,Erlotinib+Ramucirumab	LEVEL_1	EGFR:In_Frame_Del:p.480_486del|EGFR:In_Frame_Del:p.480_486del|EGFR:Missense_Mutation:p.L591R|EGFR:Missense_Mutation:p.L591R|EGFR:In_Frame_Del:p.479_483del|EGFR:In_Frame_Del:p.479_483del|EGFR:In_Frame_Del:p.478_483del|EGFR:In_Frame_Del:p.478_483del|EGFR:In_Frame_Del:p.480_486del|EGFR:In_Frame_Del:p.480_486del|EGFR:Missense_Mutation:p.L591R|EGFR:Missense_Mutation:p.L591R|EGFR:In_Frame_Del:p.478_483…	228		Erlotinib,Erlotinib+Ramucirumab	LEVEL_1	EGFR:In_Frame_Del:p.480_486del|EGFR:In_Frame_Del:p.480_486del|EGFR:Missense_Mutation:p.L591R|EGFR:Missense_Mutation:p.L591R|EGFR:In_Frame_Del:p.479_483del|EGFR:In_Frame_Del:p.479_483del|EGFR:In_Frame_Del:p.480_486del|EGFR:In_Frame_Del:p.480_486del|EGFR:Missense_Mutation:p.L591R|EGFR:Missense_Mutation:p.L591R|EGFR:In_Frame_Del:p.478_483del|EGFR:In_Frame_Del:p.478_483del|EGFR:In_Frame_Del:p.478_483…	216		Cobimetinib,Trametinib	LEVEL_2	KRAS:Missense_Mutation:p.K117N|KRAS:Missense_Mutation:p.K117N|NRAS:Missense_Mutation:p.Q61R	3		ATM	Missense_Mutation	3		ATM	Missense_Mutation	3		PIK3CA	Missense_Mutation	8
												Ivosidenib	LEVEL_1	IDH1:Missense_Mutation:p.R132C|IDH1:Missense_Mutation:p.R132C|IDH1:Missense_Mutation:p.R132C	3		Ivosidenib	LEVEL_1	IDH1:Missense_Mutation:p.R132C|IDH1:Missense_Mutation:p.R132C|IDH1:Missense_Mutation:p.R132C	3		Palbociclib,Ribociclib	LEVEL_4	CDKN2A:Nonsense_Mutation:p.E10X|CDKN2A:Nonsense_Mutation:p.E10X|CDKN2A:Nonsense_Mutation:p.E10X	3		BRAF	Missense_Mutation	6		BRAF	Missense_Mutation	6		CDKN2A	Nonsense_Mutation	1
												Olaparib	LEVEL_1	ATM:Missense_Mutation:p.R2832H	1		Olaparib	LEVEL_1	ATM:Missense_Mutation:p.R2832H	1							CDKN2A	Missense_Mutation	5		CDKN2A	Missense_Mutation	5
												Osimertinib	LEVEL_1	EGFR:Missense_Mutation:p.T523M|EGFR:Missense_Mutation:p.T523M|EGFR:Missense_Mutation:p.T523M|EGFR:Missense_Mutation:p.T523M|EGFR:Missense_Mutation:p.T523M|EGFR:Missense_Mutation:p.T523M|EGFR:Missense_Mutation:p.T523M|EGFR:Missense_Mutation:p.T523M|EGFR:Missense_Mutation:p.T523M|EGFR:Missense_Mutation:p.T523M|EGFR:Missense_Mutation:p.T523M|EGFR:Missense_Mutation:p.T523M|EGFR:Missense_Mutation:p.T5…	26		Osimertinib	LEVEL_1	EGFR:Missense_Mutation:p.T523M|EGFR:Missense_Mutation:p.T523M|EGFR:Missense_Mutation:p.T523M|EGFR:Missense_Mutation:p.T523M|EGFR:Missense_Mutation:p.T523M|EGFR:Missense_Mutation:p.T523M|EGFR:Missense_Mutation:p.T523M|EGFR:Missense_Mutation:p.T523M|EGFR:Missense_Mutation:p.T523M|EGFR:Missense_Mutation:p.T523M|EGFR:Missense_Mutation:p.T523M|EGFR:Missense_Mutation:p.T523M|EGFR:Missense_Mutation:p.T5…	22							EGFR	Missense_Mutation	118		EGFR	Missense_Mutation	109
												Sotorasib	LEVEL_1	KRAS:Missense_Mutation:p.G12C|KRAS:Missense_Mutation:p.G12C|KRAS:Missense_Mutation:p.G12C|KRAS:Missense_Mutation:p.G12C|KRAS:Missense_Mutation:p.G12C|KRAS:Missense_Mutation:p.G12C|KRAS:Missense_Mutation:p.G12C|KRAS:Missense_Mutation:p.G12C|KRAS:Missense_Mutation:p.G12C|KRAS:Missense_Mutation:p.G12C|KRAS:Missense_Mutation:p.G12C|KRAS:Missense_Mutation:p.G12C|KRAS:Missense_Mutation:p.G12C|KRAS:Miss…	18		Sotorasib	LEVEL_1	KRAS:Missense_Mutation:p.G12C|KRAS:Missense_Mutation:p.G12C|KRAS:Missense_Mutation:p.G12C|KRAS:Missense_Mutation:p.G12C|KRAS:Missense_Mutation:p.G12C|KRAS:Missense_Mutation:p.G12C|KRAS:Missense_Mutation:p.G12C|KRAS:Missense_Mutation:p.G12C|KRAS:Missense_Mutation:p.G12C|KRAS:Missense_Mutation:p.G12C|KRAS:Missense_Mutation:p.G12C|KRAS:Missense_Mutation:p.G12C|KRAS:Missense_Mutation:p.G12C|KRAS:Miss…	18							ERBB2	Missense_Mutation	3		ERBB2	Missense_Mutation	3
												Ado-Trastuzumab Emtansine,Trastuzumab Deruxtecan	LEVEL_2	ERBB2:In_Frame_Ins:p.E770delinsEAYVM|ERBB2:In_Frame_Ins:p.E770delinsEAYVM|ERBB2:In_Frame_Ins:p.E770delinsEAYVM|ERBB2:In_Frame_Ins:p.E770delinsEAYVM|ERBB2:Missense_Mutation:p.S310F|ERBB2:Missense_Mutation:p.S310F|ERBB2:Missense_Mutation:p.S310F|ERBB2:Missense_Mutation:p.S310F|ERBB2:In_Frame_Ins:p.V777delinsVGFP|ERBB2:In_Frame_Ins:p.V777delinsVGFP|ERBB2:In_Frame_Ins:p.E770delinsEAYVM|ERBB2:In_Frame…	24		Ado-Trastuzumab Emtansine,Trastuzumab Deruxtecan	LEVEL_2	ERBB2:In_Frame_Ins:p.E770delinsEAYVM|ERBB2:In_Frame_Ins:p.E770delinsEAYVM|ERBB2:In_Frame_Ins:p.E770delinsEAYVM|ERBB2:In_Frame_Ins:p.E770delinsEAYVM|ERBB2:Missense_Mutation:p.S310F|ERBB2:Missense_Mutation:p.S310F|ERBB2:Missense_Mutation:p.S310F|ERBB2:Missense_Mutation:p.S310F|ERBB2:In_Frame_Ins:p.V777delinsVGFP|ERBB2:In_Frame_Ins:p.V777delinsVGFP|ERBB2:In_Frame_Ins:p.E770delinsEAYVM|ERBB2:In_Frame…	24							FGFR3	Missense_Mutation	4		FGFR3	Missense_Mutation	4
												Alpelisib+Fulvestrant	LEVEL_2	PIK3CA:Missense_Mutation:p.M1043I|PIK3CA:Missense_Mutation:p.M1043V|PIK3CA:Missense_Mutation:p.V344G|PIK3CA:Missense_Mutation:p.R38C|PIK3CA:Missense_Mutation:p.G1049R|PIK3CA:Missense_Mutation:p.Q546H|PIK3CA:Missense_Mutation:p.C378F|PIK3CA:Missense_Mutation:p.C378R	8		Alpelisib+Fulvestrant	LEVEL_2	PIK3CA:Missense_Mutation:p.V344G|PIK3CA:Missense_Mutation:p.R38C|PIK3CA:Missense_Mutation:p.G1049R|PIK3CA:Missense_Mutation:p.C378F	4							IDH1	Missense_Mutation	3		IDH1	Missense_Mutation	2
												Cobimetinib,Trametinib	LEVEL_2	KRAS:Missense_Mutation:p.K117N|KRAS:Missense_Mutation:p.K117N|KRAS:Missense_Mutation:p.A146T|KRAS:Missense_Mutation:p.A146T|KRAS:Missense_Mutation:p.G13D|KRAS:Missense_Mutation:p.G13D|BRAF:Missense_Mutation:p.N581I|KRAS:Missense_Mutation:p.K117R|KRAS:Missense_Mutation:p.K117R|KRAS:Missense_Mutation:p.G12D|KRAS:Missense_Mutation:p.G12D|KRAS:Missense_Mutation:p.A59G|KRAS:Missense_Mutation:p.A59G|KR…	38		Cobimetinib,Trametinib	LEVEL_2	KRAS:Missense_Mutation:p.A146T|KRAS:Missense_Mutation:p.A146T|KRAS:Missense_Mutation:p.G13D|KRAS:Missense_Mutation:p.G13D|BRAF:Missense_Mutation:p.N581I|KRAS:Missense_Mutation:p.K117R|KRAS:Missense_Mutation:p.K117R|KRAS:Missense_Mutation:p.G12D|KRAS:Missense_Mutation:p.G12D|KRAS:Missense_Mutation:p.A59G|KRAS:Missense_Mutation:p.A59G|KRAS:Missense_Mutation:p.G12A|KRAS:Missense_Mutation:p.G12A|KRAS…	35							IDH2	Missense_Mutation	2		IDH2	Missense_Mutation	2
												Afatinib	LEVEL_3A	EGFR:In_Frame_Del:p.442_443del|EGFR:In_Frame_Del:p.442_443del|EGFR:In_Frame_Del:p.484_492del|EGFR:In_Frame_Del:p.484_492del	4		Afatinib	LEVEL_3A	EGFR:In_Frame_Del:p.442_443del|EGFR:In_Frame_Del:p.442_443del|EGFR:In_Frame_Del:p.484_492del|EGFR:In_Frame_Del:p.484_492del	4							KRAS	Missense_Mutation	29		KRAS	Missense_Mutation	27
												AZD5363	LEVEL_3A	AKT1:Missense_Mutation:p.E17K|AKT1:Missense_Mutation:p.E17K|AKT1:Missense_Mutation:p.E17K	3		AZD5363	LEVEL_3A	AKT1:Missense_Mutation:p.E17K|AKT1:Missense_Mutation:p.E17K|AKT1:Missense_Mutation:p.E17K	3							MAP2K1	Missense_Mutation	1		MAP2K1	Missense_Mutation	1
												Debio1347,Infigratinib	LEVEL_4	FGFR3:Missense_Mutation:p.G375D	1		Debio1347,Infigratinib	LEVEL_4	FGFR3:Missense_Mutation:p.G375D	1							MTOR	Missense_Mutation	1		MTOR	Missense_Mutation	1
												Everolimus,Temsirolimus	LEVEL_4	MTOR:Missense_Mutation:p.C1483F	1		Everolimus,Temsirolimus	LEVEL_4	MTOR:Missense_Mutation:p.C1483F	1							NRAS	Missense_Mutation	2		NRAS	Missense_Mutation	1
												Lapatinib	LEVEL_4	EGFR:Missense_Mutation:p.A244V|EGFR:Missense_Mutation:p.A244V|EGFR:Missense_Mutation:p.A244V|EGFR:Missense_Mutation:p.A244V|EGFR:Missense_Mutation:p.A244V	5		Lapatinib	LEVEL_4	EGFR:Missense_Mutation:p.A244V|EGFR:Missense_Mutation:p.A244V|EGFR:Missense_Mutation:p.A244V|EGFR:Missense_Mutation:p.A244V|EGFR:Missense_Mutation:p.A244V	5							PIK3CA	Missense_Mutation	33		PIK3CA	Missense_Mutation	25
												Palbociclib,Ribociclib	LEVEL_4	CDKN2A:Nonsense_Mutation:p.E10X|CDKN2A:Nonsense_Mutation:p.E10X|CDKN2A:Nonsense_Mutation:p.E10X|CDKN2A:Nonsense_Mutation:p.S12X|CDKN2A:Nonsense_Mutation:p.S12X|CDKN2A:Nonsense_Mutation:p.S12X	6		Palbociclib,Ribociclib	LEVEL_4	CDKN2A:Nonsense_Mutation:p.S12X|CDKN2A:Nonsense_Mutation:p.S12X|CDKN2A:Nonsense_Mutation:p.S12X	3							CDKN2A	Nonsense_Mutation	2		CDKN2A	Nonsense_Mutation	1
																											EGFR	Nonsense_Mutation	1		EGFR	Nonsense_Mutation	1
																											KRAS	Nonsense_Mutation	2		KRAS	Nonsense_Mutation	2
