# Supplementary material for: The Landscape of Actionable Genomic Alterations by Next-Generation Sequencing in Tumor Tissue Versus Circulating Tumor DNA in Chinese Patients With Non-Small Cell Lung Cancer
Source: Front Oncol. 2022 Feb 22;11:751106. doi: 10.3389/fonc.2021.751106 (PMC8902245; doi:10.3389/fonc.2021.751106)
Supplement: Supplementary file 10 [file Table_8.xlsx]

## Sheet: Sheet1
Supplementary Table8 The tumor response to Erlotinib was associated with the distribution and types of EGFR and TP53 mutations in NSCLC.
Gene.refGene	Tumor_Sample_Barcode	Tumor response	Func.ref EGFR	ExonicFunc.ref EGFR	EGFR Change.refGene	Func.ref TP53	ExonicFunc.ref TP53	TP53 Change.refGene	Func.ref other gene	ExonicFunc.ref other gene	other gene Change.refGene
EGFR	BT1904170127LNCTV	PR	exonic	nonframeshift substitution	EGFR:NM_005228:exon19:c.2252_2276A
EGFR；TP53	BT1812060130LNCTV	SD	exonic	nonsynonymous SNV	EGFR:NM_005228:exon21:c.T2582A:p.L861Q	exonic	nonsynonymous SNV	TP53:NM_000546:exon5:c.G524A:p.R175H,
	BT1902140219LNCBP	PD	exonic	nonframeshift deletion	EGFR:NM_005228:exon19:c.2236_2250del:p.746_750del	exonic	nonframeshift deletion	TP53:NM_000546:exon5:c.529_546del:p.177_182del,
	BT1903140369LNCBP	PD	exonic	nonframeshift deletion，nonsynonymous SNV	EGFR:NM_005228:exon19:c.2235_2249del:p.745_750del；EGFR:NM_005228:exon20:c.C2369T:p.T790M	exonic	nonsynonymous SNV	TP53:NM_000546:exon7:c.G711A:p.M237I
Supplementary Table8 The tumor response to Gefitinib was associated with the distribution and types of EGFR and TP53 mutations in NSCLC.
Gene.refGene	Tumor_Sample_Barcode	Tumor response	Func.ref EGFR	ExonicFunc.ref EGFR	EGFR Change.refGene	Func.ref TP53	ExonicFunc.ref TP53	TP53 Change.refGene	Func.ref other genes	ExonicFunc.ref other genes	other gene Change.refGenes
EGFR	BT1809090412LNCBP	PR	exonic	nonsynonymous SNV	EGFR:NM_005228:exon21:c.T2573G:p.L858R
	BT1808080415LNCAX	SD	exonic	nonframeshift deletion	EGFR:NM_005228:exon19:c.2235_2249del:p.745_750del
	BT1810180521LNCTV	SD	exonic	nonframeshift deletion	EGFR:NM_005228:exon19:c.2236_2250del:p.746_750del
	BT1901170111LNCBP	SD	exonic	nonsynonymous SNV	EGFR:NM_005228:exon15:c.G1774A:p.V592I
	BT1903130364LNCTV	SD	exonic	nonsynonymous SNV	EGFR:NM_005228:exon21:c.T2573G:p.L858R；EGFR:NM_005228:exon27:c.G3203A:p.R1068Q
	BT1903270269LNCBP	PR	exonic	nonsynonymous SNV，nonframeshift deletion	EGFR:NM_005228:exon20:c.C2369T:p.T790M；EGFR:NM_005228:exon19:c.2235_2249del:p.745_750del；EGFR:NM_005228:exon22:c.T2690C:p.V897A				exonic	nonsynonymous SNV	CTNNB1:NM_001904:exon3:c.C110A:p.S37Y
	BT1904210362LNCBP	PR	exonic	nonsynonymous SNV	EGFR:NM_005228:exon21:c.T2573G:p.L858R
	BT1905120273LNCBC	SD	exonic	nonsynonymous SNV，nonframeshift deletion	EGFR:NM_005228:exon20:c.C2369T:p.T790M；EGFR:NM_005228:exon19:c.2236_2244del:p.746_748del；EGFR:NM_005228:exon19:c.G2248C:p.A750P
	BT1905230271LNCTV	PR		nonframeshift substitution，nonframeshift deletion	EGFR:NM_005228:exon19:c.2237_2255T；EGFR:NM_005228:exon19:c.2237_2254del:p.746_752del
EGFR；TP53	BT1805130336LNCTV	PD	exonic	nonsynonymous SNV	EGFR:NM_005228:exon21:c.T2573G:p.L858R	splicing	.	.	exonic	stopgain,nonsynonymous SNV	RB1:NM_000321:exon17:c.C1654T:p.R552X,VHL:NM_000551:exon3:c.G589C:p.D197H
	BT1806210029LNCBP	SD	exonic	nonframeshift deletion	EGFR:NM_005228:exon19:c.2235_2249del:p.745_750del	exonic	nonsynonymous SNV	TP53:NM_000546:exon6:c.A578G:p.H193R
	BT1806220195LNCTV	SD	exonic	nonframeshift deletion	EGFR:NM_005228:exon19:c.2235_2249del:p.745_750del	exonic	nonsynonymous SNV	TP53:NM_000546:exon6:c.C569T:p.P190L
	BT1806290337LNCTB	SD	exonic	nonframeshift deletion，nonsynonymous SNV	EGFR:NM_005228:exon19:c.2236_2250del:p.746_750del；EGFR:NM_005228:exon20:c.C2369T:p.T790M	exonic	nonsynonymous SNV	TP53:NM_000546:exon7:c.A736G:p.M246V
	BT1808040195LNCTV	PR	exonic	nonsynonymous SNV	EGFR:NM_005228:exon21:c.T2573G:p.L858R	exonic	nonsynonymous SNV	TP53:NM_000546:exon5:c.G517T:p.V173L
	BT1808230036LNCBP	SD	exonic	nonsynonymous SNV	EGFR:NM_005228:exon21:c.T2573G:p.L858R	exonic	nonsynonymous SNV	TP53:NM_000546:exon6:c.A659G:p.Y220C
	BT1810270069LNCBP	SD	exonic	nonframeshift deletion	EGFR:NM_005228:exon19:c.2235_2249del:p.745_750del	exonic	nonsynonymous SNV	TP53:NM_000546:exon10:c.C1009T:p.R337C
	BT1812020489LNCTS	SD	exonic	nonsynonymous SNV	EGFR:NM_005228:exon20:c.G2303T:p.S768I；EGFR:NM_005228:exon21:c.T2573G:p.L858R	exonic	nonsynonymous SNV	TP53:NM_000546:exon7:c.A691C:p.T231P
	BT1812060034LNCTX	SD	exonic	nonframeshift deletion	EGFR:NM_005228:exon19:c.2235_2249del:p.745_750del	exonic	stopgain	TP53:NM_000546:exon9:c.C949T:p.Q317X
	BT1812160473LNCTV	PD	exonic	nonsynonymous SNV	EGFR:NM_005228:exon21:c.T2573G:p.L858R	exonic	stopgain	TP53:NM_000546:exon5:c.C493T:p.Q165X
	BT1901200062LNCTB	PD	exonic	nonsynonymous SNV	EGFR:NM_005228:exon21:c.T2573G:p.L858R	exonic	stopgain	TP53:NM_000546:exon8:c.G853T:p.E285X
	BT1902140231LNCTX	PD	exonic	nonframeshift deletion	EGFR:NM_005228:exon19:c.2235_2249del:p.745_750del	exonic	nonsynonymous SNV	TP53:NM_000546:exon7:c.G711A:p.M237I
	BT1902210293LNCTV	PR	exonic	nonframeshift deletion	EGFR:NM_005228:exon19:c.2235_2249del:p.745_750del	exonic	nonsynonymous SNV	TP53:NM_000546:exon7:c.G734A:p.G245D
	BT1905110010LNCBP	PD	exonic	nonsynonymous SNV	EGFR:NM_005228:exon21:c.T2573G:p.L858R；EGFR:NM_005228:exon20:c.C2369T:p.T790M	exonic	nonsynonymous SNV	TP53:NM_000546:exon8:c.G824A:p.C275Y
	BT1905230269LNCTV	SD	exonic	nonsynonymous SNV	EGFR:NM_005228:exon21:c.T2573G:p.L858R	exonic	nonsynonymous SNV	TP53:NM_000546:exon7:c.C742T:p.R248W
	BT1906210049LNCBP	SD	exonic	nonsynonymous SNV	EGFR:NM_005228:exon21:c.T2573G:p.L858R	exonic	nonsynonymous SNV	TP53:NM_000546:exon8:c.G830T:p.C277F
Supplementary Table8 The tumor response to Icotinib was associated with the distribution and types of EGFR and TP53 mutations in NSCLC.
Gene.refGene	Tumor_Sample_Barcode	Tumor response	Func.ref EGFR	ExonicFunc.ref EGFR	EGFR Change.refGene	Func.ref TP53	ExonicFunc.ref TP53	TP53 Change.refGene	Func.ref other gene	ExonicFunc.ref other gene	other gene Change.refGene
EGFR	BT1806030206LNCTV	SD	exonic	nonframeshift deletion	EGFR:NM_005228:exon19:c.2235_2249del:p.745_750del
	BT1810240433LNCBP	PD	exonic	nonsynonymous SNV，nonframeshift deletion	EGFR:NM_005228:exon20:c.C2369T:p.T790M；EGFR:NM_005228:exon19:c.2240_2257del:p.747_753del
	BT1810270055LNCTB	PR	exonic	nonframeshift deletion	EGFR:NM_005228:exon19:c.2240_2257del:p.747_753del
	BT1903060063LNCTB	PR	exonic	nonframeshift substitution	EGFR:NM_005228:exon19:c.2237_2257TCT
	BT1903200090LNCBC	SD	exonic	nonsynonymous SNV	EGFR:NM_005228:exon20:c.C2369T:p.T790M；EGFR:NM_005228:exon21:c.T2573G:p.L858R
EGFR；TP53	BT1805170001LNCBP	PD	exonic	nonframeshift deletion	EGFR:NM_005228:exon19:c.2236_2250del:p.746_750del	exonic	nonsynonymous SNV	TP53:NM_000546:exon7:c.A701G:p.Y234C
	BT1806010270LNCTV	SD	exonic	nonframeshift deletion	EGFR:NM_005228:exon19:c.2235_2249del:p.745_750del	exonic	nonsynonymous SNV	TP53:NM_000546:exon5:c.C530G:p.P177R
	BT1807050434LNCTB	PD	exonic	nonsynonymous SNV	EGFR:NM_005228:exon21:c.T2573G:p.L858R	exonic	nonsynonymous SNV	TP53:NM_000546:exon6:c.A578C:p.H193P
	BT1808050215LNCBP	PD	exonic	nonsynonymous SNV	EGFR:NM_005228:exon21:c.T2573G:p.L858R	exonic	nonsynonymous SNV	TP53:NM_000546:exon5:c.T470G:p.V157G
	BT1808220003LNCTB	PR	exonic	nonsynonymous SNV	EGFR:NM_005228:exon21:c.T2573G:p.L858R	exonic	nonsynonymous SNV	TP53:NM_000546:exon5:c.G404A:p.C135Y
	BT1810010050LNCTV	SD	exonic	nonsynonymous SNV	EGFR:NM_005228:exon21:c.T2573G:p.L858R	exonic	nonsynonymous SNV	TP53:NM_000546:exon10:c.T1012G:p.F338V
	BT1810130163LNCTX	SD	exonic	nonsynonymous SNV	EGFR:NM_005228:exon21:c.T2573G:p.L858R	exonic	nonsynonymous SNV	TP53:NM_000546:exon5:c.G527A:p.C176Y
	BT1810140018LNCBP	SD	exonic	nonsynonymous SNV	EGFR:NM_005228:exon21:c.T2497G:p.L833V；EGFR:NM_005228:exon21:c.T2573G:p.L858R	exonic	nonsynonymous SNV	TP53:NM_000546:exon5:c.G524A:p.R175H
	BT1812120292LNCBP	PD	exonic	nonsynonymous SNV	EGFR:NM_005228:exon21:c.T2573G:p.L858R	exonic	frameshift insertion	TP53:NM_000546:exon4:c.156dupA:p.W53fs
	BT1903030091LNCTV	PR	exonic	nonsynonymous SNV	EGFR:NM_005228:exon21:c.T2573G:p.L858R	exonic	nonsynonymous SNV	TP53:NM_000546:exon8:c.G820T:p.V274F
	BT1903090098LNCTB	PR	exonic	nonsynonymous SNV	EGFR:NM_005228:exon21:c.T2573G:p.L858R	exonic	frameshift insertion	TP53:NM_000546:exon8:c.823dupT:p.C275fs
	BT1904130273LNCBP	PR	exonic	nonframeshift deletion，nonsynonymous SNV	EGFR:NM_005228:exon19:c.2236_2244del:p.746_748del；EGFR:NM_005228:exon27:c.C3217G:p.P1073A；EGFR:NM_005228:exon19:c.G2248C:p.A750P	exonic	nonsynonymous SNV	TP53:NM_000546:exon5:c.G524A:p.R175H
	BT1904240593LNCTV	SD	exonic	nonframeshift deletion	EGFR:NM_005228:exon19:c.2240_2257del:p.747_753del	exonic	nonsynonymous SNV	TP53:NM_000546:exon5:c.G404A:p.C135Y
